# Supplementary material
Source: publisher figshare collection journal article supplement (https://gsajournals.figshare.com/ndownloader/files/14566280)
Supplement: Supplementary file 1 [file 14566280]

## Sheet: Rde1,Rde1-prp43-ts5,Rde2
																																								Average coverage			Total spectral count			Filter
PLine	Accession	peptide_count_HMAL-02(searched:2019-03-11)	peptide_count_HMAL-01(searched:2019-03-11)	peptide_count_HMAL-03(searched:2019-03-11)	peptide_count_HMAL-04(searched:2019-03-11)	peptide_count_HMAL-07(searched:2019-03-11)	peptide_count_HMAL-08(searched:2019-03-11)	peptide_count_HMAL-24(searched:2019-03-11)	NSAF_HMAL-02(searched:2019-03-11)	NSAF_HMAL-01(searched:2019-03-11)	NSAF_HMAL-03(searched:2019-03-11)	NSAF_HMAL-04(searched:2019-03-11)	NSAF_HMAL-07(searched:2019-03-11)	NSAF_HMAL-08(searched:2019-03-11)	NSAF_HMAL-24(searched:2019-03-11)	EMPAI_HMAL-02(searched:2019-03-11)	EMPAI_HMAL-01(searched:2019-03-11)	EMPAI_HMAL-03(searched:2019-03-11)	EMPAI_HMAL-04(searched:2019-03-11)	EMPAI_HMAL-07(searched:2019-03-11)	EMPAI_HMAL-08(searched:2019-03-11)	EMPAI_HMAL-24(searched:2019-03-11)	spectral_count__HMAL-02(searched:2019-03-11)	spectral_count__HMAL-01(searched:2019-03-11)	spectral_count__HMAL-03(searched:2019-03-11)	spectral_count__HMAL-04(searched:2019-03-11)	spectral_count__HMAL-07(searched:2019-03-11)	spectral_count__HMAL-08(searched:2019-03-11)	spectral_count__HMAL-24(searched:2019-03-11)	seqcov_HMAL-02(searched:2019-03-11)	seqcov_HMAL-01(searched:2019-03-11)	seqcov_HMAL-03(searched:2019-03-11)	seqcov_HMAL-04(searched:2019-03-11)	seqcov_HMAL-07(searched:2019-03-11)	seqcov_HMAL-08(searched:2019-03-11)	seqcov_HMAL-24(searched:2019-03-11)	description	occurrence	status	Rde1	Rde1-prp43-ts5	Rde2	Rde1	Rde1-prp43-ts5	Rde2	Rde1	Rde1-prp43-ts5	Rde2	ID
P	P48465	3	5	5	4	4	4	0	0.0010528	0.00363482	0.000672204	0.00169576	0.0248888	0.029008	0.0296696	3.29536	0	4.188	0	2.38844	2.90841	0.545254	2642	0	2012	0	730	1039	155	0.633	0	0.715	0	0.53	0.592	0.189	no description	5	1_0_1_0_1_1_1_	0.674	0.561	0.189	4654	1769	155	TRUE	TRUE	TRUE	CNAG_01848
P	T2BN03	3	0	5	0	0	0	0	9.81477e-05	0	0.000121852	0	0.0246362	0.0289895	0.00891723	3.22669	0	4.04661	0	2.25087	2.77572	0.468926	2591	0	1861	0	698	1003	45	0.626	0	0.703	0	0.512	0.577	0.167	Uncharacterized protein OS=Cryptococcus neoformans var. grubii serotype A (strain H99 / ATCC 208821 / CBS 10515 / FGSC 9487) OX=235443 GN=CNAG_01848 PE=4 SV=1	5	1_0_1_0_1_1_1_	0.6645	0.5445	0.167	4452	1701	45	TRUE	TRUE	TRUE	CNAG_01848
P	T2BN17	2	0	2	0	2	0	0	0.00100203	0	0.000710876	0	0.00306056	0.00310555	0	3.75335	0	6.32825	0	0.682674	0.923092	0	281	0	287	0	46	57	0	0.677	0	0.865	0	0.226	0.284	0	Pre-mRNA-splicing factor ATP-dependent RNA helicase DHX15/PRP43 OS=Cryptococcus neoformans var. grubii serotype A (strain H99 / ATCC 208821 / CBS 10515 / FGSC 9487) OX=235443 GN=CNAG_06626 PE=4 SV=1	4	1_0_1_0_1_1_0_	0.771	0.255	0	568	103	0	TRUE	TRUE	FALSE	CNAG_06626
P	T2BN71	0	0	0	0	0	2	0	0	0	0	0	0.0137775	0.021624	0.00564021	3.76431	0.0592537	5.74528	0.629296	2.38065	4.19996	0.389953	173	6	238	18	96	184	7	0.678	0.025	0.829	0.212	0.529	0.716	0.143	Large subunit ribosomal protein L4e OS=Cryptococcus neoformans var. grubii serotype A (strain H99 / ATCC 208821 / CBS 10515 / FGSC 9487) OX=235443 GN=CNAG_04762 PE=4 SV=1	7	1_1_1_1_1_1_1_	0.7535	0.6225	0.143	411	280	7	TRUE	FALSE	FALSE	CNAG_04762
P	T2BMA0	0	0	0	0	3	4	0	0	0	0	0	0.035816	0.0373279	0.0121869	4.236	3.01791	5.48634	1.74157	5.80769	3.87529	1.208	147	26	193	28	66	84	4	0.719	0.604	0.812	0.438	0.833	0.688	0.344	Uncharacterized protein OS=Cryptococcus neoformans var. grubii serotype A (strain H99 / ATCC 208821 / CBS 10515 / FGSC 9487) OX=235443 GN=CNAG_05556 PE=3 SV=1	7	1_1_1_1_1_1_1_	0.7655	0.7605	0.344	340	150	4	FALSE	FALSE	FALSE
P	T2BNM3	9	0	16	0	11	12	0	0.0012078	0	0.00128528	0	0.00162041	0.00384807	0.00818777	2.25837	0.101539	2.85478	0.0447202	0.686553	1.50035	0.870682	164	5	165	3	20	58	18	0.513	0.042	0.586	0.019	0.227	0.398	0.272	Hsp71-like protein OS=Cryptococcus neoformans var. grubii serotype A (strain H99 / ATCC 208821 / CBS 10515 / FGSC 9487) OX=235443 GN=CNAG_01727 PE=3 SV=1	7	1_1_1_1_1_1_1_	0.5495	0.3125	0.272	329	78	18	TRUE	TRUE	TRUE	CNAG_01727
P	T2BNW0	29	0	34	0	20	16	6	0.01551	0	0.0146711	0	0.00242011	0.00073013	0.00572098	0.97697	0	1.6485	0	0.577611	0.191242	0.492794	60	0	253	0	19	7	8	0.296	0	0.423	0	0.198	0.076	0.174	FK506-binding protein OS=Cryptococcus neoformans var. grubii serotype A (strain H99 / ATCC 208821 / CBS 10515 / FGSC 9487) OX=235443 GN=CNAG_01148 PE=3 SV=2	5	1_0_1_0_1_1_1_	0.3595	0.137	0.174	313	26	8	TRUE	FALSE	TRUE	CNAG_01148
P	T2BNY5	0	0	3	0	0	0	0	0	0	6.74904e-05	0	0.00188929	0.00138251	0.265855	0.625549	0	0.552387	0	0.415794	0.358313	4.19996	107	0	173	0	47	42	1178	0.211	0	0.191	0	0.151	0.133	0.716	no description	5	1_0_1_0_1_1_1_	0.201	0.142	0.716	280	89	1178	TRUE	TRUE	TRUE	CNAG_04954
P	T2BNX3	0	0	0	0	3	0	0	0	0	0	0	0.000345661	0.000202182	0.00138619	0.694338	0	2.43558	0	0.158777	0.135011	0.111732	29	0	247	0	7	5	5	0.229	0	0.536	0	0.064	0.055	0.046	Elongation factor 3 OS=Cryptococcus neoformans var. grubii serotype A (strain H99 / ATCC 208821 / CBS 10515 / FGSC 9487) OX=235443 GN=CNAG_01117 PE=4 SV=2	5	1_0_1_0_1_1_1_	0.3825	0.0595	0.046	276	12	5	TRUE	FALSE	FALSE	CNAG_01117
P	T2BNZ0	32	0	52	2	33	37	0	0.0153818	0	0.0155199	0.00110114	0.000679514	0.00194754	0.00254335	2.28852	0.1324	3.86407	0.111732	0.435489	0.815516	0.318257	185	3	83	2	6	21	4	0.517	0.054	0.687	0.046	0.157	0.259	0.12	Elongation factor 1-alpha OS=Cryptococcus neoformans var. grubii serotype A (strain H99 / ATCC 208821 / CBS 10515 / FGSC 9487) OX=235443 GN=CNAG_06125 PE=3 SV=1	7	1_1_1_1_1_1_1_	0.602	0.208	0.12	268	27	4	TRUE	TRUE	TRUE	CNAG_06125
P	T2BNG0	0	0	2	0	0	0	0	0	0	3.57251e-05	0	0.00481142	0.00108689	0.0195611	2.20627	0	2.63915	0	1.57632	0.432188	0.990673	79	0	176	0	29	8	21	0.506	0	0.561	0	0.411	0.156	0.299	rRNA 2'-O-methyltransferase fibrillarin OS=Cryptococcus neoformans var. grubii serotype A (strain H99 / ATCC 208821 / CBS 10515 / FGSC 9487) OX=235443 GN=CNAG_06919 PE=3 SV=1	5	1_0_1_0_1_1_1_	0.5335	0.2835	0.299	255	37	21	TRUE	TRUE	TRUE	CNAG_06919
P	T2BNK6	4	0	10	0	0	0	0	8.44942e-05	0	0.000284731	0	0.0138483	0.0113401	0.00246823	2.46737	0	4.5335	0.081434	2.97192	3.73151	0.30017	100	0	149	2	63	63	2	0.54	0	0.743	0.034	0.599	0.675	0.114	40S ribosomal protein S6 OS=Cryptococcus neoformans var. grubii serotype A (strain H99 / ATCC 208821 / CBS 10515 / FGSC 9487) OX=235443 GN=CNAG_01152 PE=3 SV=1	6	1_0_1_1_1_1_1_	0.6415	0.637	0.114	249	126	2	TRUE	TRUE	TRUE	CNAG_01152
P	T2BNJ3	4	0	7	0	0	4	0	0.000447787	0	0.000370623	0	0.0125565	0.0145483	0.00224989	1.79254	0.185769	3.05509	0.185769	3.40555	2.89045	0.185769	113	3	123	6	94	133	3	0.446	0.074	0.608	0.074	0.644	0.59	0.074	Large subunit ribosomal protein L3 OS=Cryptococcus neoformans var. grubii serotype A (strain H99 / ATCC 208821 / CBS 10515 / FGSC 9487) OX=235443 GN=CNAG_01884 PE=3 SV=1	7	1_1_1_1_1_1_1_	0.527	0.617	0.074	236	227	3	TRUE	TRUE	FALSE	CNAG_01884
P	T2BNJ0	20	0	37	0	11	10	4	0.00167288	0	0.00189888	0	0.0237581	0.0187519	0	5.0256	1.24905	5.76083	1.78612	3.98884	5.26614	0	129	5	105	15	83	80	0	0.78	0.352	0.83	0.445	0.698	0.797	0	Large subunit ribosomal protein L22 OS=Cryptococcus neoformans var. grubii serotype A (strain H99 / ATCC 208821 / CBS 10515 / FGSC 9487) OX=235443 GN=CNAG_06447 PE=3 SV=1	6	1_1_1_1_1_1_0_	0.805	0.7475	0	234	163	0	FALSE	FALSE	FALSE
P	T2BP29	2	0	2	0	0	0	0	0.000496603	0	0.000411026	0	0.0209559	0.015717	0	2.53997	0	5.42688	0	3.28549	3.9204	0	59	0	166	0	107	98	0	0.549	0	0.808	0	0.632	0.692	0	Large subunit ribosomal protein L7Ae OS=Cryptococcus neoformans var. grubii serotype A (strain H99 / ATCC 208821 / CBS 10515 / FGSC 9487) OX=235443 GN=CNAG_05555 PE=4 SV=1	4	1_0_1_0_1_1_0_	0.6785	0.662	0	225	205	0	TRUE	TRUE	FALSE	CNAG_05555
P	H6VMG0	2	0	2	0	0	0	0	0.000228208	0	4.62568e-05	0	0.0338356	0.0444197	0.0180919	2.39625	0.766038	3.35512	0.496236	2.91742	2.39625	0.94536	84	7	139	20	126	202	12	0.531	0.247	0.639	0.175	0.593	0.531	0.289	Ribosomal protein L19 OS=Cryptococcus neoformans var. grubii serotype A (strain H99 / ATCC 208821 / CBS 10515 / FGSC 9487) OX=235443 GN=CNAG_04448 PE=3 SV=1	7	1_1_1_1_1_1_1_	0.585	0.562	0.289	223	328	12	FALSE	FALSE	FALSE
P	Q059G6	4	0	7	0	6	3	0	0.000559999	0	0.000283774	0	0.0117272	0.01145	0	1.90402	0	4.08159	0.0839269	2.6141	3.73151	0	90	0	128	2	52	62	0	0.463	0	0.706	0.035	0.558	0.675	0	40S ribosomal protein S6 OS=Cryptococcus neoformans var. grubii serotype A (strain H99 / ATCC 208821 / CBS 10515 / FGSC 9487) OX=235443 GN=CNAG_01152 PE=3 SV=1	5	1_0_1_1_1_1_0_	0.5845	0.6165	0	218	114	0	TRUE	TRUE	FALSE	CNAG_01152
P	T2BQ66	0	0	0	0	0	0	6	0	0	0	0	0.0143009	0.0184026	0.013764	3.16869	0	5.19441	0	4.08159	4.87489	0.798871	98	0	111	0	70	110	12	0.62	0	0.792	0	0.706	0.769	0.255	Large subunit ribosomal protein L8 OS=Cryptococcus neoformans var. grubii serotype A (strain H99 / ATCC 208821 / CBS 10515 / FGSC 9487) OX=235443 GN=CNAG_05232 PE=4 SV=1	5	1_0_1_0_1_1_1_	0.706	0.7375	0.255	209	180	12	TRUE	TRUE	TRUE	CNAG_05232
P	T2BQ51	0	0	2	0	0	0	0	0	0	4.09781e-05	0	0.00524089	0.00352301	0	0.534617	0	1.77332	0	1.34963	1.26986	0	53	0	143	0	67	55	0	0.186	0	0.443	0	0.371	0.356	0	Nucleolar GTP-binding protein 1 OS=Cryptococcus neoformans var. grubii serotype A (strain H99 / ATCC 208821 / CBS 10515 / FGSC 9487) OX=235443 GN=CNAG_06468 PE=3 SV=1	4	1_0_1_0_1_1_0_	0.3145	0.3635	0	196	122	0	TRUE	TRUE	FALSE	CNAG_06468
P	T2BPJ4	0	0	4	0	0	0	0	0	0	0.000599112	0	0.0104984	0.0090836	0.010009	1.95801	0.213389	3.39542	0	2.31894	1.69153	0.25603	90	2	102	0	53	56	9	0.471	0.084	0.643	0	0.521	0.43	0.099	40S ribosomal protein S4 OS=Cryptococcus neoformans var. grubii serotype A (strain H99 / ATCC 208821 / CBS 10515 / FGSC 9487) OX=235443 GN=CNAG_00640 PE=3 SV=1	6	1_1_1_0_1_1_1_	0.557	0.4755	0.099	192	109	9	TRUE	TRUE	FALSE	CNAG_00640
P	T2BQJ3	0	0	0	0	2	0	0	0	0	0	0	0.00732601	0.00266628	0	1.8119	0	3.65586	0	1.52348	2.16228	0	72	0	90	0	36	16	0	0.449	0	0.668	0	0.402	0.5	0	Small subunit ribosomal protein S2 OS=Cryptococcus neoformans var. grubii serotype A (strain H99 / ATCC 208821 / CBS 10515 / FGSC 9487) OX=235443 GN=CNAG_06605 PE=3 SV=1	4	1_0_1_0_1_1_0_	0.5585	0.451	0	162	52	0	TRUE	TRUE	FALSE	CNAG_06605
P	J9VD88	20	0	20	4	7	15	0	0.00830332	0	0.00377892	0.00302814	0.000108684	5.9333e-05	0	0.625549	0	0.853532	0	0.0399202	0.0399202	0	70	0	92	0	3	2	0	0.211	0	0.268	0	0.017	0.017	0	Fatty acid synthase subunit alpha, fungi type OS=Cryptococcus neoformans var. grubii serotype A (strain H99 / ATCC 208821 / CBS 10515 / FGSC 9487) OX=235443 GN=CNAG_02100 PE=4 SV=1	4	1_0_1_0_1_1_0_	0.2395	0.017	0	162	5	0	TRUE	FALSE	FALSE	CNAG_02100
P	T2BQQ8	3	0	7	0	3	2	0	0.000146902	0	0.000286599	0	0.00775239	0.00863367	0.0121869	3.33511	0	6.29458	0	4.32108	3.45656	1.47172	66	0	88	0	25	34	7	0.637	0	0.863	0	0.726	0.649	0.393	Uncharacterized protein OS=Cryptococcus neoformans var. grubii serotype A (strain H99 / ATCC 208821 / CBS 10515 / FGSC 9487) OX=235443 GN=CNAG_08025 PE=4 SV=1	5	1_0_1_0_1_1_1_	0.75	0.6875	0.393	154	59	7	TRUE	TRUE	TRUE	CNAG_08025
P	J9VE53	2	0	9	0	0	0	0	0.000228538	0	0.000729599	0	0.000892611	0.00232573	0.0059226	1.17771	0	1.97852	0	0.51008	0.990673	0.61808	66	0	84	0	11	35	13	0.338	0	0.474	0	0.179	0.299	0.209	Hsp72-like protein OS=Cryptococcus neoformans var. grubii serotype A (strain H99 / ATCC 208821 / CBS 10515 / FGSC 9487) OX=235443 GN=CNAG_01750 PE=3 SV=1	5	1_0_1_0_1_1_1_	0.406	0.239	0.209	150	46	13	TRUE	TRUE	TRUE	CNAG_1750
P	J9VDR3	0	0	4	0	0	6	0	0	0	0.00102649	0	0.0204563	0.0280721	0.00189311	1.01837	0	1.5527	0	4.86138	7.27942	0.164126	68	0	77	0	364	610	6	0.305	0	0.407	0	0.768	0.918	0.066	Argonaute OS=Cryptococcus neoformans var. grubii serotype A (strain H99 / ATCC 208821 / CBS 10515 / FGSC 9487) OX=235443 GN=CNAG_04609 PE=1 SV=2	5	1_0_1_0_1_1_1_	0.356	0.843	0.066	145	974	6	TRUE	TRUE	FALSE	CNAG_04609
P	J9VE09	0	0	0	0	2	0	0	0	0	0	0	0.0128277	0.0152206	0	2.69828	0	2.25837	0.216186	2.69828	4.67545	0	55	0	90	2	49	71	0	0.568	0	0.513	0.085	0.568	0.754	0	Large subunit ribosomal protein L13 OS=Cryptococcus neoformans var. grubii serotype A (strain H99 / ATCC 208821 / CBS 10515 / FGSC 9487) OX=235443 GN=CNAG_06231 PE=3 SV=1	5	1_0_1_1_1_1_0_	0.5405	0.661	0	145	120	0	TRUE	TRUE	FALSE	CNAG_06231
P	J9VEG9	6	0	12	0	2	0	0	0.00104199	0	0.00139632	0	0.00687668	0.0165523	0	0.737801	0.158777	1.53513	0.355189	1.31206	4.05825	0	81	4	61	16	33	97	0	0.24	0.064	0.404	0.132	0.364	0.704	0	Large subunit ribosomal protein L7e OS=Cryptococcus neoformans var. grubii serotype A (strain H99 / ATCC 208821 / CBS 10515 / FGSC 9487) OX=235443 GN=CNAG_00656 PE=4 SV=1	6	1_1_1_1_1_1_0_	0.322	0.534	0	142	130	0	TRUE	FALSE	FALSE	CNAG_00656
P	J9VEZ7	0	0	5	0	0	0	0	0	0	0.000369993	0	0.0079515	0.0143698	0.00769698	1.76694	0.273503	3.22669	0	1.73527	2.4435	0.566751	48	2	94	0	29	64	5	0.442	0.105	0.626	0	0.437	0.537	0.195	Large subunit ribosomal protein L18-A OS=Cryptococcus neoformans var. grubii serotype A (strain H99 / ATCC 208821 / CBS 10515 / FGSC 9487) OX=235443 GN=CNAG_01224 PE=4 SV=1	6	1_1_1_0_1_1_1_	0.534	0.487	0.195	142	93	5	FALSE	TRUE	TRUE	CNAG_01224
P	J9VEU2	4	0	3	0	0	0	0	0.000280663	0	0.00036504	0	0.0176099	0.01412	0.00823902	1.21309	0	3.30527	0	2.01301	2.77572	0.706082	83	0	57	0	48	47	4	0.345	0	0.634	0	0.479	0.577	0.232	Large subunit ribosomal protein L27Ae OS=Cryptococcus neoformans var. grubii serotype A (strain H99 / ATCC 208821 / CBS 10515 / FGSC 9487) OX=235443 GN=CNAG_03747 PE=3 SV=1	5	1_0_1_0_1_1_1_	0.4895	0.528	0.232	140	95	4	TRUE	TRUE	TRUE	CNAG_03747
P	J9VF80	3	0	7	0	0	3	0	5.07671e-05	0	0.000144064	0	0.00311129	0.00266628	0	1.02302	0	2.16228	0	1.15278	1.20293	0	69	0	71	0	43	45	0	0.306	0	0.5	0	0.333	0.343	0	Nucleolar GTP-binding protein 2 OS=Cryptococcus neoformans var. grubii serotype A (strain H99 / ATCC 208821 / CBS 10515 / FGSC 9487) OX=235443 GN=NOG2 PE=3 SV=2	4	1_0_1_0_1_1_0_	0.403	0.338	0	140	88	0	TRUE	TRUE	FALSE	CNAG_07413
P	J9VF94	0	0	5	0	0	0	0	0	0	0.000236268	0	0.00432747	0.0029985	0	1.24388	0	1.31206	0	1.05589	0.761976	0	51	0	88	0	26	22	0	0.351	0	0.364	0	0.313	0.246	0	Ribosome biogenesis regulatory protein OS=Cryptococcus neoformans var. grubii serotype A (strain H99 / ATCC 208821 / CBS 10515 / FGSC 9487) OX=235443 GN=CNAG_06273 PE=3 SV=1	4	1_0_1_0_1_1_0_	0.3575	0.2795	0	139	48	0	TRUE	TRUE	FALSE	CNAG_06273
P	J9VF99	34	2	48	0	30	26	4	0.0135102	0.00207309	0.0108626	0	0.0203021	0.015684	0.0129038	1.8119	0.425608	3.50817	0	4.82103	2.94457	1.66686	53	2	85	0	53	50	6	0.449	0.154	0.654	0	0.765	0.596	0.426	Large subunit ribosomal protein L27e OS=Cryptococcus neoformans var. grubii serotype A (strain H99 / ATCC 208821 / CBS 10515 / FGSC 9487) OX=235443 GN=CNAG_00779 PE=4 SV=1	6	1_1_1_0_1_1_1_	0.5515	0.6805	0.426	138	103	6	FALSE	TRUE	TRUE	CNAG_00779
P	J9VF13	6	0	16	3	32	18	0	0.00248692	0	0.00639564	0.00400573	0.000469804	0.00042746	0.000879214	0.479108	0.0592537	0.614359	0.0303861	0.0990058	0.205036	0.0303861	62	2	76	3	9	10	3	0.17	0.025	0.208	0.013	0.041	0.081	0.013	Plasma membrane ATPase OS=Cryptococcus neoformans var. grubii serotype A (strain H99 / ATCC 208821 / CBS 10515 / FGSC 9487) OX=235443 GN=CNAG_06400 PE=3 SV=1	7	1_1_1_1_1_1_1_	0.189	0.061	0.013	138	19	3	TRUE	FALSE	FALSE	CNAG_06400
P	J9VEP2	2	0	3	0	0	0	0	0.000150457	0	0.00010674	0	0.0210388	0.0429339	0.00749962	2.45144	0.999862	4.22396	1.8119	4.87489	5.23735	0.402814	40	30	88	68	63	157	4	0.538	0.301	0.718	0.449	0.769	0.795	0.147	Large subunit ribosomal protein L28e OS=Cryptococcus neoformans var. grubii serotype A (strain H99 / ATCC 208821 / CBS 10515 / FGSC 9487) OX=235443 GN=CNAG_04068 PE=4 SV=1	7	1_1_1_1_1_1_1_	0.628	0.782	0.147	128	220	4	FALSE	FALSE	FALSE
P	J9VF52	7	0	19	0	10	17	0	0.0150233	0	0.00817947	0	0.0138673	0.0270081	0.00420842	1.17771	1.21309	4.50808	2.13329	2.69828	5.5013	0.21899	71	5	48	30	37	88	2	0.338	0.345	0.741	0.496	0.568	0.813	0.086	Large subunit ribosomal protein L14e OS=Cryptococcus neoformans var. grubii serotype A (strain H99 / ATCC 208821 / CBS 10515 / FGSC 9487) OX=235443 GN=CNAG_04799 PE=4 SV=1	7	1_1_1_1_1_1_1_	0.5395	0.6905	0.086	119	125	2	FALSE	FALSE	FALSE	CNAG_04799
P	J9VEL7	12	0	31	0	17	21	5	0.00173609	0	0.00196151	0	0.000595383	0.000487548	0.00250702	1.8119	0	3.00867	0	0.21899	0.309182	0.21899	51	0	67	0	4	4	3	0.449	0	0.603	0	0.086	0.117	0.086	DNA-directed RNA polymerase I and III subunit RPAC1 OS=Cryptococcus neoformans var. grubii serotype A (strain H99 / ATCC 208821 / CBS 10515 / FGSC 9487) OX=235443 GN=CNAG_01179 PE=4 SV=1	5	1_0_1_0_1_1_1_	0.526	0.1015	0.086	118	8	3	TRUE	FALSE	FALSE	CNAG_01179
P	J9VEN6	0	0	6	0	0	0	0	0	0	0.000628396	0	0.00874214	0.00832756	0.00200332	1.13305	0.0990058	2.67282	0.999862	1.70396	2.8815	0.0990058	53	3	64	30	49	57	2	0.329	0.041	0.565	0.301	0.432	0.589	0.041	40S ribosomal protein S0 OS=Cryptococcus neoformans var. grubii serotype A (strain H99 / ATCC 208821 / CBS 10515 / FGSC 9487) OX=235443 GN=RPS0 PE=3 SV=1	7	1_1_1_1_1_1_1_	0.447	0.5105	0.041	117	106	2	TRUE	FALSE	FALSE	CNAG_04114
P	J9VEM3	0	0	2	0	0	0	0	0	0	0.00022112	0	0.0108252	0.00443226	0	2.11889	0	4.02343	0	2.20627	1.64241	0	58	0	59	0	32	16	0	0.494	0	0.701	0	0.506	0.422	0	Large subunit ribosomal protein L23 OS=Cryptococcus neoformans var. grubii serotype A (strain H99 / ATCC 208821 / CBS 10515 / FGSC 9487) OX=235443 GN=CNAG_03053 PE=3 SV=1	4	1_0_1_0_1_1_0_	0.5975	0.464	0	117	48	0	TRUE	TRUE	FALSE	CNAG_03053
P	J9VFJ7	4	0	10	0	5	3	0	0.000313333	0	0.000444579	0	0.00094269	0.000528177	0.000835672	0.892344	0	0.798871	0	0.380384	0.402814	0.1324	51	0	60	0	19	13	3	0.277	0	0.255	0	0.14	0.147	0.054	Uncharacterized protein OS=Cryptococcus neoformans var. grubii serotype A (strain H99 / ATCC 208821 / CBS 10515 / FGSC 9487) OX=235443 GN=CNAG_01125 PE=4 SV=1	5	1_0_1_0_1_1_1_	0.266	0.1435	0.054	111	32	3	TRUE	TRUE	FALSE	CNAG_01125
P	J9VFG4	3	13	15	7	26	20	5	0.00156666	0.0411081	0.0206729	0.0171594	0.00017279	0.000106121	0.00145515	0.330454	0	0.721869	0	0.111732	0.0665962	0.0914403	46	0	65	0	4	3	6	0.124	0	0.236	0	0.046	0.028	0.038	DNA-directed RNA polymerase subunit beta OS=Cryptococcus neoformans var. grubii serotype A (strain H99 / ATCC 208821 / CBS 10515 / FGSC 9487) OX=235443 GN=CNAG_04513 PE=3 SV=2	5	1_0_1_0_1_1_1_	0.18	0.037	0.038	111	7	6	TRUE	FALSE	FALSE	CNAG_04513
P	J9VFH9	0	0	6	0	0	0	0	0	0	0.000308917	0	0.0100185	0.00656315	0.00421854	1.99226	0	2.99025	0	2.89942	1.29615	0.472312	27	0	81	0	40	32	3	0.476	0	0.601	0	0.591	0.361	0.168	40S ribosomal protein S8 OS=Cryptococcus neoformans var. grubii serotype A (strain H99 / ATCC 208821 / CBS 10515 / FGSC 9487) OX=235443 GN=CNAG_03198 PE=3 SV=1	5	1_0_1_0_1_1_1_	0.5385	0.476	0.168	108	72	3	TRUE	TRUE	TRUE	CNAG_03198
P	J9VFH1	0	0	0	0	2	0	0	0	0	0	0	0.0288793	0.0264309	0.0127167	0.778279	0.492794	4.91562	0.492794	6.58578	3.2658	0.610646	13	11	92	42	51	57	4	0.25	0.174	0.772	0.174	0.88	0.63	0.207	Large subunit ribosomal protein L37a OS=Cryptococcus neoformans var. grubii serotype A (strain H99 / ATCC 208821 / CBS 10515 / FGSC 9487) OX=235443 GN=CNAG_04011 PE=3 SV=1	7	1_1_1_1_1_1_1_	0.511	0.755	0.207	105	108	4	FALSE	FALSE	FALSE
P	J9VFD0	0	0	0	0	3	0	0	0	0	0	0	0.0101975	0.00998436	0.00373385	0.648162	0	2.68129	0	2.37287	3.10204	0.104079	41	0	64	0	46	55	3	0.217	0	0.566	0	0.528	0.613	0.043	60S ribosomal protein L6 OS=Cryptococcus neoformans var. grubii serotype A (strain H99 / ATCC 208821 / CBS 10515 / FGSC 9487) OX=235443 GN=CNAG_02234 PE=3 SV=1	5	1_0_1_0_1_1_1_	0.3915	0.5705	0.043	105	101	3	TRUE	TRUE	FALSE	CNAG_02234
P	J9VFA7	0	0	4	0	0	0	0	0	0	0.000156691	0	0.00804572	0.010871	0.00451715	1.72898	0	3.57088	0.205036	2.26588	4.09331	0.389953	27	0	75	7	40	66	4	0.436	0	0.66	0.081	0.514	0.707	0.143	40S ribosomal protein S1 OS=Cryptococcus neoformans var. grubii serotype A (strain H99 / ATCC 208821 / CBS 10515 / FGSC 9487) OX=235443 GN=RPS1 PE=3 SV=1	6	1_0_1_1_1_1_1_	0.548	0.6105	0.143	102	106	4	TRUE	TRUE	TRUE
P	J9VFV8	8	0	4	0	4	2	0	0.00148644	0	0.000379633	0	0.0147442	0.000804914	0	1.60016	0.270574	2.60579	0.270574	1.60016	0.270574	0	23	9	79	7	30	2	0	0.415	0.104	0.557	0.104	0.415	0.104	0	Large subunit ribosomal protein L44 OS=Cryptococcus neoformans var. grubii serotype A (strain H99 / ATCC 208821 / CBS 10515 / FGSC 9487) OX=235443 GN=CNAG_04884 PE=3 SV=2	6	1_1_1_1_1_1_0_	0.486	0.2595	0	102	32	0	FALSE	FALSE	FALSE
P	J9VG91	0	2	7	0	8	3	0	0	0.00482498	0.00247863	0	0.0138923	0.0178768	0	1.5704	0	2.41193	0	2.89045	2.41193	0	57	0	43	0	28	44	0	0.41	0	0.533	0	0.59	0.533	0	Large subunit ribosomal protein L33-b OS=Cryptococcus neoformans var. grubii serotype A (strain H99 / ATCC 208821 / CBS 10515 / FGSC 9487) OX=235443 GN=CNAG_05800 PE=3 SV=1	4	1_0_1_0_1_1_0_	0.4715	0.5615	0	100	72	0	TRUE	TRUE	FALSE	CNAG_05800
P	J9VG96	3	0	3	0	0	0	0	0.000413944	0	0.000110125	0	0.0230192	0.0146335	0.00680198	1.14289	0	3.18794	0	4.47016	3.53942	0.475707	48	0	51	0	76	59	4	0.331	0	0.622	0	0.738	0.657	0.169	60S ribosomal protein L20 OS=Cryptococcus neoformans var. grubii serotype A (strain H99 / ATCC 208821 / CBS 10515 / FGSC 9487) OX=235443 GN=CNAG_04726 PE=3 SV=1	5	1_0_1_0_1_1_1_	0.4765	0.6975	0.169	99	135	4	TRUE	TRUE	TRUE	CNAG_04726
P	J9VFY0	0	0	2	0	0	0	0	0	0	0.000169748	0	0.0198461	0.0216688	0.0139279	0.761976	1.11349	1.58821	0.577611	3.89779	2.72392	0.8281	5	19	93	17	48	64	6	0.246	0.325	0.413	0.198	0.69	0.571	0.262	Large subunit ribosomal protein L31e OS=Cryptococcus neoformans var. grubii serotype A (strain H99 / ATCC 208821 / CBS 10515 / FGSC 9487) OX=235443 GN=CNAG_00703 PE=4 SV=1	7	1_1_1_1_1_1_1_	0.3295	0.6305	0.262	98	112	6	FALSE	FALSE	FALSE
P	J9VFY8	6	0	15	2	12	10	0	0.00310199	0	0.00540164	0.00272532	0.00566848	0.00442077	0.00303093	1.24905	0	2.03389	0	1.82488	1.33346	0.224616	33	0	63	0	21	20	2	0.352	0	0.482	0	0.451	0.368	0.088	Small subunit ribosomal protein S9 OS=Cryptococcus neoformans var. grubii serotype A (strain H99 / ATCC 208821 / CBS 10515 / FGSC 9487) OX=235443 GN=CNAG_02331 PE=3 SV=1	5	1_0_1_0_1_1_1_	0.417	0.4095	0.088	96	41	2	TRUE	TRUE	FALSE	CNAG_02331
P	J9VFT1	0	0	3	0	0	0	0	0	0	0.000123567	0	0.0169615	0.0152123	0	1.2751	0	5.39735	0	2.8815	2.13329	0	27	0	64	0	42	46	0	0.357	0	0.806	0	0.589	0.496	0	Large subunit ribosomal protein L32e OS=Cryptococcus neoformans var. grubii serotype A (strain H99 / ATCC 208821 / CBS 10515 / FGSC 9487) OX=235443 GN=CNAG_06222 PE=4 SV=1	4	1_0_1_0_1_1_0_	0.5815	0.5425	0	91	88	0	TRUE	TRUE	FALSE	CNAG_06222
P	J9VFR5	5	0	0	0	0	0	0	0.000648393	0	0	0	0.000808173	0.000865427	0.00174514	0.644372	0	1.58821	0	0.324342	0.409289	0.174898	35	0	56	0	13	17	5	0.216	0	0.413	0	0.122	0.149	0.07	Elongation factor 2 OS=Cryptococcus neoformans var. grubii serotype A (strain H99 / ATCC 208821 / CBS 10515 / FGSC 9487) OX=235443 GN=CNAG_06840 PE=4 SV=2	5	1_0_1_0_1_1_1_	0.3145	0.1355	0.07	91	30	5	TRUE	TRUE	FALSE	CNAG_06840
P	J9VFX9	0	0	0	0	0	0	6	0	0	0	0	0.000819914	0.000826353	0.00141639	0.65577	0	1.62422	0	0.327394	0.377209	0.145513	35	0	56	0	13	16	4	0.219	0	0.419	0	0.123	0.139	0.059	Elongation factor 2, variant OS=Cryptococcus neoformans var. grubii serotype A (strain H99 / ATCC 208821 / CBS 10515 / FGSC 9487) OX=235443 GN=CNAG_06840 PE=4 SV=1	5	1_0_1_0_1_1_1_	0.319	0.131	0.059	91	29	4	TRUE	TRUE	FALSE	CNAG_06840
P	J9VFV3	21	0	29	0	27	21	4	0.0230763	0	0.0112429	0	0.013024	0.0163927	0.0027082	1.06538	0	3.64515	0.306171	2.99945	3.64515	0.264736	31	0	59	4	54	83	2	0.315	0	0.667	0.116	0.602	0.667	0.102	Large subunit ribosomal protein L10-like OS=Cryptococcus neoformans var. grubii serotype A (strain H99 / ATCC 208821 / CBS 10515 / FGSC 9487) OX=235443 GN=CNAG_03739 PE=4 SV=1	6	1_0_1_1_1_1_1_	0.491	0.6345	0.102	90	137	2	TRUE	FALSE	FALSE	CNAG_03739
P	J9VG29	0	0	0	0	14	13	0	0	0	0	0	0.0175348	0.0135265	0	1.32274	0	3.12098	0	3.30527	3.0738	0	20	0	68	0	69	65	0	0.366	0	0.615	0	0.634	0.61	0	Large subunit ribosomal protein L13e OS=Cryptococcus neoformans var. grubii serotype A (strain H99 / ATCC 208821 / CBS 10515 / FGSC 9487) OX=235443 GN=CNAG_06095 PE=3 SV=1	4	1_0_1_0_1_1_0_	0.4905	0.622	0	88	134	0	TRUE	TRUE	FALSE	CNAG_06095
P	J9VFU7	0	0	2	0	0	0	0	0	0	0.000169236	0	0	0	0.00183664	0.702159	0	1.5527	0	0	0	0.180321	25	0	63	0	0	0	4	0.231	0	0.407	0	0	0	0.072	ATP-dependent RNA helicase ded1 OS=Cryptococcus neoformans var. grubii serotype A (strain H99 / ATCC 208821 / CBS 10515 / FGSC 9487) OX=235443 GN=CNAG_00809 PE=3 SV=1	3	1_0_1_0_0_0_1_	0.319	0	0.072	88	0	4	TRUE	FALSE	FALSE	CNAG_00809
P	J9VG26	0	0	0	0	2	0	0	0	0	0	0	0.00227403	0.00474005	0	1.49459	0	1.21309	0.592209	0.745822	2.13329	0	53	0	34	6	11	28	0	0.397	0	0.345	0.202	0.242	0.496	0	Small subunit ribosomal protein S3 OS=Cryptococcus neoformans var. grubii serotype A (strain H99 / ATCC 208821 / CBS 10515 / FGSC 9487) OX=235443 GN=CNAG_00116 PE=3 SV=1	5	1_0_1_1_1_1_0_	0.371	0.369	0	87	39	0	TRUE	FALSE	FALSE	CNAG_00116
P	J9VGM3	0	0	4	0	7	0	0	0	0	0.00287938	0	0.000754104	0.000411681	0	0.438799	0	0.552387	0	0.207814	0.224616	0	32	0	55	0	12	8	0	0.158	0	0.191	0	0.082	0.088	0	Ribosome biogenesis protein ERB1 OS=Cryptococcus neoformans var. grubii serotype A (strain H99 / ATCC 208821 / CBS 10515 / FGSC 9487) OX=235443 GN=ERB1 PE=3 SV=1	4	1_0_1_0_1_1_0_	0.1745	0.085	0	87	20	0	TRUE	FALSE	FALSE
P	J9VGM5	5	0	9	0	0	0	0	0.000468284	0	0.000843322	0	0.0136752	0.0130648	0.0054841	0.857804	0.702159	2.34965	0.541701	2.70681	1.81838	0.241652	23	6	61	8	42	49	3	0.269	0.231	0.525	0.188	0.569	0.45	0.094	Large subunit ribosomal protein L21e OS=Cryptococcus neoformans var. grubii serotype A (strain H99 / ATCC 208821 / CBS 10515 / FGSC 9487) OX=235443 GN=CNAG_02330 PE=4 SV=1	7	1_1_1_1_1_1_1_	0.397	0.5095	0.094	84	91	3	FALSE	FALSE	FALSE
P	J9VGN1	0	0	0	0	2	0	0	0	0	0	0	0.0127508	0.0149162	0.00613605	2.14051	0.174898	4.87489	0.967886	2.39625	4.16416	0.967886	42	2	42	10	35	50	3	0.497	0.07	0.769	0.294	0.531	0.713	0.294	Small subunit ribosomal protein S17 OS=Cryptococcus neoformans var. grubii serotype A (strain H99 / ATCC 208821 / CBS 10515 / FGSC 9487) OX=235443 GN=CNAG_01170 PE=3 SV=1	7	1_1_1_1_1_1_1_	0.633	0.622	0.294	84	85	3	TRUE	FALSE	FALSE	CNAG_01170
P	J9VH01	0	0	0	0	32	32	0	0	0	0	0	0.00881227	0.0133712	0	0.923092	0	2.52371	0	1.93765	2.48337	0	25	0	56	0	34	63	0	0.284	0	0.547	0	0.468	0.542	0	Ribosomal protein L15 OS=Cryptococcus neoformans var. grubii serotype A (strain H99 / ATCC 208821 / CBS 10515 / FGSC 9487) OX=235443 GN=CNAG_01486 PE=3 SV=1	4	1_0_1_0_1_1_0_	0.4155	0.505	0	81	97	0	TRUE	TRUE	FALSE	CNAG_01486
P	J9VH03	2	0	7	0	3	3	0	0.000490434	0	0.00504501	0	0.000631212	0.000206755	0.252322	0.534617	0	0.428894	0	0.303167	0.247383	4.188	56	0	22	0	15	6	1068	0.186	0	0.155	0	0.115	0.096	0.715	Uncharacterized protein OS=Cryptococcus neoformans var. grubii serotype A (strain H99 / ATCC 208821 / CBS 10515 / FGSC 9487) OX=235443 GN=CNAG_04954 PE=4 SV=2	5	1_0_1_0_1_1_1_	0.1705	0.1055	0.715	78	21	1068	TRUE	FALSE	TRUE	CNAG_04954
P	J9VGJ3	2	0	3	0	3	0	0	8.69602e-05	0	0.000308464	0	0.00352734	0.00392536	0.0192959	0.492794	2.23594	1.28034	0.415794	1.38232	1.24905	0.819701	27	98	49	34	39	53	38	0.174	0.51	0.358	0.151	0.377	0.352	0.26	Thyroid hormone receptor interactor 13 OS=Cryptococcus neoformans var. grubii serotype A (strain H99 / ATCC 208821 / CBS 10515 / FGSC 9487) OX=235443 GN=CNAG_02578 PE=3 SV=2	7	1_1_1_1_1_1_1_	0.266	0.3645	0.26	76	92	38	FALSE	FALSE	FALSE
P	J9VGI9	4	0	0	0	3	0	0	0.000602747	0	0	0	0.0069154	0.0105707	0	2.46737	0	5.13762	0	2.00608	1.30675	0	43	0	33	0	15	28	0	0.54	0	0.788	0	0.478	0.363	0	Large subunit ribosomal protein L34e OS=Cryptococcus neoformans var. grubii serotype A (strain H99 / ATCC 208821 / CBS 10515 / FGSC 9487) OX=235443 GN=CNAG_00821 PE=3 SV=1	4	1_0_1_0_1_1_0_	0.664	0.4205	0	76	43	0	TRUE	TRUE	FALSE	CNAG_00821
P	J9VGJ9	0	0	3	0	0	0	0	0	0	0.000113303	0	0.0036155	0.00121118	0	0.995262	0	1.68534	0	0.786488	0.923092	0	44	0	29	0	22	9	0	0.3	0	0.429	0	0.252	0.284	0	Ribosome production factor 2 OS=Cryptococcus neoformans var. grubii serotype A (strain H99 / ATCC 208821 / CBS 10515 / FGSC 9487) OX=235443 GN=CNAG_01187 PE=4 SV=1	4	1_0_1_0_1_1_0_	0.3645	0.268	0	73	31	0	TRUE	TRUE	FALSE	CNAG_01187
P	J9VGE0	0	0	0	0	0	0	8	0	0	0	0	0.00220602	0.00173699	0.0023818	0.729816	0	2.2434	0	0.581248	1.2751	0.276439	27	0	43	0	26	25	5	0.238	0	0.511	0	0.199	0.357	0.106	Hsp75-like protein OS=Cryptococcus neoformans var. grubii serotype A (strain H99 / ATCC 208821 / CBS 10515 / FGSC 9487) OX=235443 GN=CNAG_00334 PE=3 SV=1	5	1_0_1_0_1_1_1_	0.3745	0.278	0.106	70	51	5	TRUE	TRUE	TRUE	CNAG_00334
P	J9VGZ7	6	0	0	0	0	0	0	0.000306521	0	0	0	0.00424486	0.00094801	0	1.51189	0	2.13329	0	2.47536	0.584893	0	37	0	33	0	11	3	0	0.4	0	0.496	0	0.541	0.2	0	Small subunit ribosomal protein S24e OS=Cryptococcus neoformans var. grubii serotype A (strain H99 / ATCC 208821 / CBS 10515 / FGSC 9487) OX=235443 GN=CNAG_01332 PE=3 SV=1	4	1_0_1_0_1_1_0_	0.448	0.3705	0	70	14	0	TRUE	TRUE	FALSE	CNAG_01332
P	J9VGY9	3	0	10	0	11	7	0	0.00737537	0	0.00892579	0	0	0.000143036	0	0.377209	0	0.737801	0	0	0.0990058	0	26	0	44	0	0	4	0	0.139	0	0.24	0	0	0.041	0	DNA-directed RNA polymerase subunit beta OS=Cryptococcus neoformans var. grubii serotype A (strain H99 / ATCC 208821 / CBS 10515 / FGSC 9487) OX=235443 GN=CNAG_06611 PE=3 SV=2	3	1_0_1_0_0_1_0_	0.1895	0.0205	0	70	4	0	TRUE	FALSE	FALSE	CNAG_06611
P	J9VH55	4	0	2	0	0	2	0	0.000341325	0	0.000121074	0	0.0187733	0.0103769	0.00527	1.8774	0	3.10204	0.901078	3.36516	1.76058	0.452112	37	0	27	5	40	27	2	0.459	0	0.613	0.279	0.64	0.441	0.162	60S ribosomal protein L36 OS=Cryptococcus neoformans var. grubii serotype A (strain H99 / ATCC 208821 / CBS 10515 / FGSC 9487) OX=235443 GN=CNAG_03510 PE=3 SV=1	6	1_0_1_1_1_1_1_	0.536	0.5405	0.162	64	67	2	TRUE	FALSE	FALSE	CNAG_03510
P	J9VGR3	2	0	6	0	0	0	0	0.000266756	0	0.000264945	0	0.0125031	0.0138951	0.00835672	1.23357	0.648162	1.61216	1.0893	1.75423	2.39625	0.336596	19	9	43	16	42	57	5	0.349	0.217	0.417	0.32	0.44	0.531	0.126	Large subunit ribosomal protein L11, variant OS=Cryptococcus neoformans var. grubii serotype A (strain H99 / ATCC 208821 / CBS 10515 / FGSC 9487) OX=235443 GN=CNAG_07839 PE=3 SV=1	7	1_1_1_1_1_1_1_	0.383	0.4855	0.126	62	99	5	FALSE	FALSE	FALSE
P	J9VGW3	14	0	28	0	23	10	0	0.0148691	0	0.0107305	0	0.00749094	0.00585536	0	2.0479	0	4.64937	1.2856	3.85288	2.70681	0	19	0	43	9	22	21	0	0.484	0	0.752	0.359	0.686	0.569	0	Small subunit ribosomal protein S11 OS=Cryptococcus neoformans var. grubii serotype A (strain H99 / ATCC 208821 / CBS 10515 / FGSC 9487) OX=235443 GN=CNAG_00672 PE=3 SV=1	5	1_0_1_1_1_1_0_	0.618	0.6275	0	62	43	0	TRUE	FALSE	FALSE	CNAG_00672
P	J9VGW9	2	0	0	0	0	0	0	0.000267963	0	0	0	0.000690014	0.000423779	0	0.415794	0	0.757924	0	0.282331	0.142878	0	19	0	43	0	8	6	0	0.151	0	0.245	0	0.108	0.058	0	Protein LTV1 OS=Cryptococcus neoformans var. grubii serotype A (strain H99 / ATCC 208821 / CBS 10515 / FGSC 9487) OX=235443 GN=CNAG_03302 PE=4 SV=1	4	1_0_1_0_1_1_0_	0.198	0.083	0	62	14	0	TRUE	FALSE	FALSE	CNAG_03302
P	J9VH36	3	0	6	0	0	0	0	0.0010716	0	0.000760231	0	0.0069154	0.00528537	0	0.918669	0	1.82488	0	1.04174	1.60615	0	32	0	28	0	30	28	0	0.283	0	0.451	0	0.31	0.416	0	Ribosomal protein OS=Cryptococcus neoformans var. grubii serotype A (strain H99 / ATCC 208821 / CBS 10515 / FGSC 9487) OX=235443 GN=CNAG_02144 PE=3 SV=1	4	1_0_1_0_1_1_0_	0.367	0.363	0	60	58	0	TRUE	TRUE	FALSE	CNAG_02144
P	J9VI11	4	0	10	0	0	3	0	0.000482443	0	0.00102679	0	0.00308463	0.00126297	0	1.55859	0	2.41193	0	1.23357	0.807174	0	26	0	31	0	18	9	0	0.408	0	0.533	0	0.349	0.257	0	Large subunit ribosomal protein L5e OS=Cryptococcus neoformans var. grubii serotype A (strain H99 / ATCC 208821 / CBS 10515 / FGSC 9487) OX=235443 GN=CNAG_02928 PE=3 SV=1	4	1_0_1_0_1_1_0_	0.4705	0.303	0	57	27	0	TRUE	TRUE	FALSE	CNAG_02928
P	J9VHQ7	0	0	2	0	0	0	0	0	0	0.000169748	0	0.000872631	0.000500206	0	0.383566	0	0.798871	0	0.291219	0.261828	0	16	0	41	0	10	7	0	0.141	0	0.255	0	0.111	0.101	0	Nucleolar protein 12 OS=Cryptococcus neoformans var. grubii serotype A (strain H99 / ATCC 208821 / CBS 10515 / FGSC 9487) OX=235443 GN=CNAG_01564 PE=4 SV=1	4	1_0_1_0_1_1_0_	0.198	0.106	0	57	17	0	TRUE	TRUE	FALSE	CNAG_01564
P	J9VH45	3	0	2	0	0	0	0	0.000341325	0	0.000121074	0	0.000697715	0.00066657	0	1.208	0	1.07491	0	0.196741	0.636817	0	38	0	19	0	6	7	0	0.344	0	0.317	0	0.078	0.214	0	Tubulin alpha chain OS=Cryptococcus neoformans var. grubii serotype A (strain H99 / ATCC 208821 / CBS 10515 / FGSC 9487) OX=235443 GN=CNAG_03787 PE=3 SV=1	4	1_0_1_0_1_1_0_	0.3305	0.146	0	57	13	0	TRUE	FALSE	FALSE	CNAG_03787
P	J9VI18	3	0	0	0	4	3	0	0.00054986	0	0	0	0	0.00010405	0	0.3122	0	0.614359	0	0	0.0471286	0	24	0	33	0	0	3	0	0.118	0	0.208	0	0	0.02	0	STE/STE11 protein kinase OS=Cryptococcus neoformans var. grubii serotype A (strain H99 / ATCC 208821 / CBS 10515 / FGSC 9487) OX=235443 GN=CNAG_06980 PE=4 SV=1	3	1_0_1_0_0_1_0_	0.163	0.01	0	57	3	0	TRUE	FALSE	FALSE	CNAG_06980
P	J9VHL5	0	2	0	0	3	0	0	0	0.00973612	0	0	0.00155125	0.00190543	0	0.227439	0	1.68534	0	0.361445	0.309182	0	17	0	39	0	12	18	0	0.089	0	0.429	0	0.134	0.117	0	Chaperone regulator OS=Cryptococcus neoformans var. grubii serotype A (strain H99 / ATCC 208821 / CBS 10515 / FGSC 9487) OX=235443 GN=CNAG_03944 PE=3 SV=1	4	1_0_1_0_1_1_0_	0.259	0.1255	0	56	30	0	FALSE	TRUE	FALSE	CNAG_03944
P	J9VHH7	0	0	2	0	3	0	0	0	0	0.000124759	0	0.000349638	0.000286312	0	0.588547	0	1.59418	0	0.104079	0.161449	0	25	0	28	0	3	3	0	0.201	0	0.414	0	0.043	0.065	0	Tubulin beta chain OS=Cryptococcus neoformans var. grubii serotype A (strain H99 / ATCC 208821 / CBS 10515 / FGSC 9487) OX=235443 GN=CNAG_01840 PE=3 SV=2	4	1_0_1_0_1_1_0_	0.3075	0.054	0	53	6	0	TRUE	FALSE	FALSE	CNAG_01840
P	J9VHH2	0	0	2	0	0	0	0	0	0	8.96272e-05	0	0.00112035	0.000327653	0	0.336596	0	1.208	0	0.3122	0.124605	0	23	0	28	0	14	5	0	0.126	0	0.344	0	0.118	0.051	0	Nuclear GTP-binding protein OS=Cryptococcus neoformans var. grubii serotype A (strain H99 / ATCC 208821 / CBS 10515 / FGSC 9487) OX=235443 GN=CNAG_02720 PE=4 SV=1	4	1_0_1_0_1_1_0_	0.235	0.0845	0	51	19	0	TRUE	FALSE	FALSE	CNAG_02720
P	J9VHC1	18	14	29	13	32	28	2	0.0101231	0.0524253	0.0157997	0.0554382	0.00347307	0.00255963	0	3.57088	1.15278	5.30957	0	1.15278	1.0893	0	23	7	25	0	10	9	0	0.66	0.333	0.8	0	0.333	0.32	0	Small subunit ribosomal protein S14 OS=Cryptococcus neoformans var. grubii serotype A (strain H99 / ATCC 208821 / CBS 10515 / FGSC 9487) OX=235443 GN=CNAG_05904 PE=3 SV=1	5	1_1_1_0_1_1_0_	0.73	0.3265	0	48	19	0	FALSE	TRUE	FALSE	CNAG_05904
P	J9VHE4	7	0	32	7	20	14	0	0.00490274	0	0.00787167	0.00748128	0.00113928	0.000678496	0	0.733804	0	0.803018	0	0.339677	0.352073	0	33	0	14	0	11	8	0	0.239	0	0.256	0	0.127	0.131	0	H/ACA ribonucleoprotein complex subunit 4 OS=Cryptococcus neoformans var. grubii serotype A (strain H99 / ATCC 208821 / CBS 10515 / FGSC 9487) OX=235443 GN=CNAG_01168 PE=4 SV=1	4	1_0_1_0_1_1_0_	0.2475	0.129	0	47	19	0	TRUE	TRUE	FALSE	CNAG_01168
P	J9VI93	3	0	6	0	0	0	0	0.000247329	0	0.000241264	0	0.00155921	0.000976384	0.00360457	0.761976	0	0.678804	0	0.370882	0.452112	0.333522	26	0	20	0	17	13	7	0.246	0	0.225	0	0.137	0.162	0.125	Nucleolar protein 58 OS=Cryptococcus neoformans var. grubii serotype A (strain H99 / ATCC 208821 / CBS 10515 / FGSC 9487) OX=235443 GN=CNAG_05976 PE=4 SV=1	5	1_0_1_0_1_1_1_	0.2355	0.1495	0.125	46	30	7	TRUE	TRUE	TRUE	CNAG_05976
P	J9VIC1	0	0	2	0	0	0	0	0	0	0.000169492	0	0.00801478	0.00421917	0	0.538155	0	1.24905	0	2.0479	1.30675	0	17	0	29	0	14	9	0	0.187	0	0.352	0	0.484	0.363	0	Ribosomal protein L37 OS=Cryptococcus neoformans var. grubii serotype A (strain H99 / ATCC 208821 / CBS 10515 / FGSC 9487) OX=235443 GN=CNAG_03015 PE=3 SV=1	4	1_0_1_0_1_1_0_	0.2695	0.4235	0	46	23	0	TRUE	TRUE	FALSE	CNAG_03015
P	J9VI97	5	0	8	0	2	2	0	0.000264374	0	0.000281335	0	0.000714869	0.000512218	0	0.303167	0	0.333522	0	0.297179	0.2218	0	24	0	22	0	8	7	0	0.115	0	0.125	0	0.113	0.087	0	Periodic tryptophan protein 1 OS=Cryptococcus neoformans var. grubii serotype A (strain H99 / ATCC 208821 / CBS 10515 / FGSC 9487) OX=235443 GN=CNAG_04694 PE=4 SV=1	4	1_0_1_0_1_1_0_	0.12	0.1	0	46	15	0	TRUE	FALSE	FALSE	CNAG_04694
P	J9VIB2	0	0	4	0	0	0	0	0	0	0.000563242	0	0	0	0	0.244515	0	0.205036	0	0	0	0	13	0	33	0	0	0	0	0.095	0	0.081	0	0	0	0	CAMKK/ELM protein kinase OS=Cryptococcus neoformans var. grubii serotype A (strain H99 / ATCC 208821 / CBS 10515 / FGSC 9487) OX=235443 GN=CNAG_03791 PE=4 SV=1	2	1_0_1_0_0_0_0_	0.088	0	0	46	0	0	FALSE	FALSE	FALSE
P	J9VI50	5	0	6	0	5	3	0	0.000311971	0	0.000188125	0	0.00665889	0.0115472	0	1.46037	0.566751	2.08319	0	3.43609	2.79315	0	24	5	21	0	17	36	0	0.391	0.195	0.489	0	0.647	0.579	0	Large subunit ribosomal protein L24 OS=Cryptococcus neoformans var. grubii serotype A (strain H99 / ATCC 208821 / CBS 10515 / FGSC 9487) OX=235443 GN=CNAG_04021 PE=4 SV=1	5	1_1_1_0_1_1_0_	0.44	0.613	0	45	53	0	FALSE	TRUE	FALSE	CNAG_04021
P	J9VHS2	3	0	10	0	2	4	0	0.000787629	0	0.000768313	0	0.022575	0.0093853	0.00779961	0.610646	0	1.51189	0	3.29536	2.41193	0.489361	16	0	28	0	65	33	4	0.207	0	0.4	0	0.633	0.533	0.173	Large subunit ribosomal protein L24e OS=Cryptococcus neoformans var. grubii serotype A (strain H99 / ATCC 208821 / CBS 10515 / FGSC 9487) OX=235443 GN=CNAG_03283 PE=4 SV=1	5	1_0_1_0_1_1_1_	0.3035	0.583	0.173	44	98	4	TRUE	TRUE	TRUE	CNAG_03283
P	J9VJ33	0	2	0	0	2	0	0	0	0.00187362	0	0	0.00806648	0.00963301	0	1.00909	0	3.15911	0.193988	2.0903	2.74973	0	21	0	23	2	24	35	0	0.303	0	0.619	0.077	0.49	0.574	0	Small subunit ribosomal protein S18 OS=Cryptococcus neoformans var. grubii serotype A (strain H99 / ATCC 208821 / CBS 10515 / FGSC 9487) OX=235443 GN=CNAG_04883 PE=3 SV=1	5	1_0_1_1_1_1_0_	0.461	0.532	0	44	59	0	TRUE	TRUE	FALSE	CNAG_04883
P	J9VJ27	0	0	2	0	2	2	0	0	0	6.60059e-05	0	0.000521482	0.000341625	0	0.435489	0	0.244515	0	0.145513	0.172195	0	18	0	26	0	10	8	0	0.157	0	0.095	0	0.059	0.069	0	Non-specific serine/threonine protein kinase OS=Cryptococcus neoformans var. grubii serotype A (strain H99 / ATCC 208821 / CBS 10515 / FGSC 9487) OX=235443 GN=CNAG_01938 PE=4 SV=1	4	1_0_1_0_1_1_0_	0.126	0.064	0	44	18	0	FALSE	FALSE	FALSE
P	J9VIQ4	0	0	0	0	2	2	0	0	0	0	0	0	0	0	0.0519619	0	0.0914403	0	0	0	0	7	0	37	0	0	0	0	0.022	0	0.038	0	0	0	0	Acetyl-CoA carboxylase/biotin carboxylase OS=Cryptococcus neoformans var. grubii serotype A (strain H99 / ATCC 208821 / CBS 10515 / FGSC 9487) OX=235443 GN=CNAG_05759 PE=4 SV=2	2	1_0_1_0_0_0_0_	0.03	0	0	44	0	0	FALSE	FALSE	FALSE
P	J9VIT0	0	0	0	0	2	0	0	0	0	0	0	0.0100599	0.00470736	0	1.10863	0	2.39625	0	2.23594	1.39332	0	6	0	36	0	28	16	0	0.324	0	0.531	0	0.51	0.379	0	Small subunit ribosomal protein S23 OS=Cryptococcus neoformans var. grubii serotype A (strain H99 / ATCC 208821 / CBS 10515 / FGSC 9487) OX=235443 GN=CNAG_03127 PE=3 SV=1	4	1_0_1_0_1_1_0_	0.4275	0.4445	0	42	44	0	TRUE	TRUE	FALSE	CNAG_03127
P	J9VIS1	2	0	2	0	0	0	0	0.000130297	0	0.000138656	0	0.000223588	0.000183092	0	0.573983	0.0789467	1.15278	0	0.114295	0.0789467	0	13	2	29	0	3	3	0	0.197	0.033	0.333	0	0.047	0.033	0	Hsp90-like protein OS=Cryptococcus neoformans var. grubii serotype A (strain H99 / ATCC 208821 / CBS 10515 / FGSC 9487) OX=235443 GN=CNAG_06150 PE=3 SV=1	5	1_1_1_0_1_1_0_	0.265	0.04	0	42	6	0	TRUE	FALSE	FALSE	CNAG_06150
P	J9VJ48	2	0	0	0	0	0	0	0.00010891	0	0	0	0.00159376	0.00122353	0	0.513561	0	0.629296	0	0.415794	0.845015	0	16	0	24	0	16	15	0	0.18	0	0.212	0	0.151	0.266	0	Ribosome assembly protein 4, variant OS=Cryptococcus neoformans var. grubii serotype A (strain H99 / ATCC 208821 / CBS 10515 / FGSC 9487) OX=235443 GN=CNAG_01432 PE=4 SV=1	4	1_0_1_0_1_1_0_	0.196	0.2085	0	40	31	0	TRUE	TRUE	FALSE	CNAG_01432
P	J9VJB2	6	0	5	0	0	0	0	0.000921921	0	0.000230839	0	0.00152662	0.00117199	0	0.485936	0	0.595879	0	0.396368	0.798871	0	16	0	24	0	16	15	0	0.172	0	0.203	0	0.145	0.255	0	Ribosome assembly protein 4 OS=Cryptococcus neoformans var. grubii serotype A (strain H99 / ATCC 208821 / CBS 10515 / FGSC 9487) OX=235443 GN=CNAG_01432 PE=4 SV=1	4	1_0_1_0_1_1_0_	0.1875	0.2	0	40	31	0	TRUE	TRUE	FALSE	CNAG_01432
P	J9VIG0	5	0	2	0	0	0	0	0.000200152	0	3.54987e-05	0	0.00240443	0.000656315	0	0.409289	0	1.51189	0	0.548817	0.273503	0	10	0	30	0	18	6	0	0.149	0	0.4	0	0.19	0.105	0	rRNA-processing protein EBP2 OS=Cryptococcus neoformans var. grubii serotype A (strain H99 / ATCC 208821 / CBS 10515 / FGSC 9487) OX=235443 GN=CNAG_01236 PE=4 SV=1	4	1_0_1_0_1_1_0_	0.2745	0.1475	0	40	24	0	TRUE	TRUE	FALSE	CNAG_01236
P	J9VIL5	0	0	2	0	0	0	0	0	0	0.000270875	0	0.00104942	0.00030691	0	0.210598	0	0.386756	0	0.333522	0.142878	0	10	0	30	0	14	5	0	0.083	0	0.142	0	0.125	0.058	0	Ribosomal RNA methyltransferase Nop2 OS=Cryptococcus neoformans var. grubii serotype A (strain H99 / ATCC 208821 / CBS 10515 / FGSC 9487) OX=235443 GN=CNAG_03724 PE=3 SV=1	4	1_0_1_0_1_1_0_	0.1125	0.0915	0	40	19	0	FALSE	FALSE	FALSE
P	J9VID8	0	0	0	0	0	3	0	0	0	0	0	0.000292674	0.000119833	0	0.361445	0	0.264736	0	0.0964782	0.0789467	0	27	0	13	0	6	3	0	0.134	0	0.102	0	0.04	0.033	0	ATP-dependent RNA helicase DOB1 OS=Cryptococcus neoformans var. grubii serotype A (strain H99 / ATCC 208821 / CBS 10515 / FGSC 9487) OX=235443 GN=CNAG_01398 PE=4 SV=1	4	1_0_1_0_1_1_0_	0.118	0.0365	0	40	9	0	TRUE	FALSE	FALSE	CNAG_01398
P	J9VJD5	0	0	2	0	0	0	0	0	0	8.91991e-05	0	0.00455208	0.00248508	0.017038	1.13796	0.671091	0.999862	0.710015	0.786488	1.33884	1.2856	16	4	23	7	9	6	6	0.33	0.223	0.301	0.233	0.252	0.369	0.359	Histone H4 OS=Cryptococcus neoformans var. grubii serotype A (strain H99 / ATCC 208821 / CBS 10515 / FGSC 9487) OX=235443 GN=CNAG_01648 PE=3 SV=1	7	1_1_1_1_1_1_1_	0.3155	0.3105	0.359	39	15	6	FALSE	FALSE	FALSE
P	J9VJC5	5	3	18	5	23	15	3	0.00557868	0.0325949	0.0280085	0.0580613	0.000206321	0.000675809	0	1.10378	0	0.315225	0	0.122018	0.227439	0	25	0	14	0	2	8	0	0.323	0	0.119	0	0.05	0.089	0	Uncharacterized protein OS=Cryptococcus neoformans var. grubii serotype A (strain H99 / ATCC 208821 / CBS 10515 / FGSC 9487) OX=235443 GN=CNAG_04176 PE=3 SV=2	4	1_0_1_0_1_1_0_	0.221	0.0695	0	39	10	0	TRUE	FALSE	FALSE	CNAG_04176
P	J9VJD9	2	0	0	0	0	0	0	0.000113611	0	0	0	0.000200562	0.000164237	0	0.62181	0	0.458814	0	0.109175	0.153453	0	18	0	21	0	4	4	0	0.21	0	0.164	0	0.045	0.062	0	GTPase activator OS=Cryptococcus neoformans var. grubii serotype A (strain H99 / ATCC 208821 / CBS 10515 / FGSC 9487) OX=235443 GN=CNAG_06325 PE=4 SV=1	4	1_0_1_0_1_1_0_	0.187	0.0535	0	39	8	0	TRUE	FALSE	FALSE	CNAG_06325
P	J9VJA0	11	0	6	0	0	0	0	0.00046584	0	0.000227208	0	0.00483749	0.00487548	0	0.258925	0	2.43558	0.21899	1.95801	1.81838	0	11	0	27	3	13	16	0	0.1	0	0.536	0.086	0.471	0.45	0	Small subunit ribosomal protein S16 OS=Cryptococcus neoformans var. grubii serotype A (strain H99 / ATCC 208821 / CBS 10515 / FGSC 9487) OX=235443 GN=CNAG_03780 PE=3 SV=1	5	1_0_1_1_1_1_0_	0.318	0.4605	0	38	29	0	FALSE	TRUE	FALSE	CNAG_03780
P	J9VJ71	37	0	64	0	44	57	7	0.0151727	0	0.0121919	0	0	0	0	0.0690548	0	0.114295	0	0	0	0	19	0	19	0	0	0	0	0.029	0	0.047	0	0	0	0	Protein kinase regulator OS=Cryptococcus neoformans var. grubii serotype A (strain H99 / ATCC 208821 / CBS 10515 / FGSC 9487) OX=235443 GN=CNAG_07507 PE=4 SV=2	2	1_0_1_0_0_0_0_	0.038	0	0	38	0	0	FALSE	FALSE	FALSE
P	J9VJ67	0	0	4	0	0	0	0	0	0	0.000245151	0	0	0	0	0.253141	0	0.0914403	0	0	0	0	16	0	22	0	0	0	0	0.098	0	0.038	0	0	0	0	Guanyl nucleotide exchange factor Sql2 OS=Cryptococcus neoformans var. grubii serotype A (strain H99 / ATCC 208821 / CBS 10515 / FGSC 9487) OX=235443 GN=CNAG_06160 PE=4 SV=2	2	1_0_1_0_0_0_0_	0.068	0	0	38	0	0	FALSE	FALSE	FALSE
P	J9VJ75	0	0	0	0	4	4	0	0	0	0	0	0.0155878	0.00873364	0	0.721869	0	2.25087	0.3122	3.66659	1.91743	0	8	0	29	4	38	26	0	0.236	0	0.512	0.118	0.669	0.465	0	Large subunit ribosomal protein L29 OS=Cryptococcus neoformans var. grubii serotype A (strain H99 / ATCC 208821 / CBS 10515 / FGSC 9487) OX=235443 GN=CNAG_00771 PE=3 SV=1	5	1_0_1_1_1_1_0_	0.374	0.567	0	37	64	0	TRUE	FALSE	FALSE	CNAG_00771
P	J9VJ87	11	0	4	0	0	2	0	0.000773457	0	0.000119287	0	0.000123499	6.74207e-05	0	0.0764652	0	0.0616956	0	0.0447202	0.0303861	0	20	0	17	0	6	4	0	0.032	0	0.026	0	0.019	0.013	0	Pre-mRNA-processing-splicing factor 8 OS=Cryptococcus neoformans var. grubii serotype A (strain H99 / ATCC 208821 / CBS 10515 / FGSC 9487) OX=235443 GN=CNAG_00147 PE=4 SV=1	4	1_0_1_0_1_1_0_	0.029	0.016	0	37	10	0	FALSE	FALSE	FALSE
P	J9VJR8	0	0	5	0	0	0	0	0	0	0.000344932	0	0.000177399	9.68455e-05	0	0.364583	0	0.393157	0	0.0939563	0.14025	0	22	0	15	0	3	2	0	0.135	0	0.144	0	0.039	0.057	0	Uncharacterized protein OS=Cryptococcus neoformans var. grubii serotype A (strain H99 / ATCC 208821 / CBS 10515 / FGSC 9487) OX=235443 GN=CNAG_02857 PE=4 SV=1	4	1_0_1_0_1_1_0_	0.1395	0.048	0	37	5	0	TRUE	FALSE	FALSE	CNAG_02857
P	J9VJJ1	0	0	2	0	4	4	0	0	0	0.00102783	0	0.00631467	0.00420141	0.00443159	0.745822	0	1.1928	0	0.840772	1.26986	0.629296	14	0	22	0	16	13	2	0.242	0	0.341	0	0.265	0.356	0.212	40S ribosomal protein S26 OS=Cryptococcus neoformans var. grubii serotype A (strain H99 / ATCC 208821 / CBS 10515 / FGSC 9487) OX=235443 GN=CNAG_05525 PE=3 SV=1	5	1_0_1_0_1_1_1_	0.2915	0.3105	0.212	36	29	2	TRUE	TRUE	TRUE	CNAG_05525
P	J9VK44	0	0	4	0	0	0	0	0	0	0.000493542	0	0.000331822	0	0	1.05116	0	1.23872	0	0.380384	0	0	12	0	24	0	2	0	0	0.312	0	0.35	0	0.14	0	0	Guanine nucleotide-binding protein subunit beta-like protein OS=Cryptococcus neoformans var. grubii serotype A (strain H99 / ATCC 208821 / CBS 10515 / FGSC 9487) OX=235443 GN=CNAG_05465 PE=1 SV=1	3	1_0_1_0_1_0_0_	0.331	0.07	0	36	2	0	TRUE	FALSE	FALSE	CNAG_05465
P	J9VJJ6	20	0	37	0	11	11	5	0.00164892	0	0.00187169	0	0	6.64493e-05	0.000455584	0.273503	0	0.177606	0	0	0.0351422	0.0351422	20	0	15	0	0	2	2	0.105	0	0.071	0	0	0.015	0.015	Antiviral helicase SKI2 OS=Cryptococcus neoformans var. grubii serotype A (strain H99 / ATCC 208821 / CBS 10515 / FGSC 9487) OX=235443 GN=CNAG_04131 PE=4 SV=2	4	1_0_1_0_0_1_1_	0.088	0.0075	0.015	35	2	2	FALSE	FALSE	FALSE
P	J9VJK2	6	0	3	0	0	0	0	0.000706681	0	0.000100269	0	0.000313832	0.000256991	0	0.358313	0	0.106624	0	0.148154	0.0839269	0	25	0	9	0	4	4	0	0.133	0	0.044	0	0.06	0.035	0	Uncharacterized protein OS=Cryptococcus neoformans var. grubii serotype A (strain H99 / ATCC 208821 / CBS 10515 / FGSC 9487) OX=235443 GN=CNAG_03752 PE=4 SV=1	4	1_0_1_0_1_1_0_	0.0885	0.0475	0	34	8	0	FALSE	FALSE	FALSE
P	J9VKD2	2	0	0	0	0	0	0	0.000198392	0	0	0	0.00137095	0.000972958	0	0.717908	0	0.663413	0	0.503142	0.364583	0	25	0	8	0	15	13	0	0.235	0	0.221	0	0.177	0.135	0	Nucleolar protein 56 OS=Cryptococcus neoformans var. grubii serotype A (strain H99 / ATCC 208821 / CBS 10515 / FGSC 9487) OX=235443 GN=CNAG_02209 PE=4 SV=1	4	1_0_1_0_1_1_0_	0.228	0.156	0	33	28	0	TRUE	TRUE	FALSE	CNAG_02209
P	J9VKD0	0	0	4	0	0	0	0	0	0	0.000243024	0	0.000745751	0.000348961	0.00119626	0.766038	0	0.625549	0	0.288249	0.135011	0.124605	16	0	17	0	7	4	2	0.247	0	0.211	0	0.11	0.055	0.051	Homocitrate synthase, mitochondrial OS=Cryptococcus neoformans var. grubii serotype A (strain H99 / ATCC 208821 / CBS 10515 / FGSC 9487) OX=235443 GN=CNAG_00992 PE=3 SV=1	5	1_0_1_0_1_1_1_	0.229	0.0825	0.051	33	11	2	TRUE	FALSE	FALSE	CNAG_00992
P	J9VJG3	0	0	4	0	0	0	0	0	0	0.000390091	0	0.000101027	0	0	0.081434	0	0.1324	0	0.0447202	0	0	7	0	26	0	3	0	0	0.034	0	0.054	0	0.019	0	0	Superkiller protein 3 OS=Cryptococcus neoformans var. grubii serotype A (strain H99 / ATCC 208821 / CBS 10515 / FGSC 9487) OX=235443 GN=CNAG_01039 PE=4 SV=1	3	1_0_1_0_1_0_0_	0.044	0.0095	0	33	3	0	FALSE	FALSE	FALSE
P	J9VJG0	0	0	3	0	0	0	0	0	0	5.86361e-05	0	0	0.000119497	0	0.16681	0	0.499685	0	0	0.0351422	0	9	0	24	0	0	2	0	0.067	0	0.176	0	0	0.015	0	Catalase OS=Cryptococcus neoformans var. grubii serotype A (strain H99 / ATCC 208821 / CBS 10515 / FGSC 9487) OX=235443 GN=CNAG_04981 PE=3 SV=1	3	1_0_1_0_0_1_0_	0.1215	0.0075	0	33	2	0	FALSE	FALSE	FALSE
P	J9VKB4	0	0	3	0	0	0	0	0	0	0.000246616	0	0.00315734	0.0069808	0	3.32514	0	1.21309	0	1.06538	2.56451	0	25	0	7	0	10	27	0	0.636	0	0.345	0	0.315	0.552	0	Large subunit ribosomal protein L12 OS=Cryptococcus neoformans var. grubii serotype A (strain H99 / ATCC 208821 / CBS 10515 / FGSC 9487) OX=235443 GN=CNAG_01480 PE=3 SV=1	4	1_0_1_0_1_1_0_	0.4905	0.4335	0	32	37	0	TRUE	TRUE	FALSE	CNAG_01480
P	J9VKA5	3	0	4	0	3	2	0	0.000195204	0	0.000121174	0	0.0017011	0.00139299	0	2.0903	0	2.17687	0	0.527566	0.823896	0	15	0	17	0	8	8	0	0.49	0	0.502	0	0.184	0.261	0	Eukaryotic translation initiation factor 6 OS=Cryptococcus neoformans var. grubii serotype A (strain H99 / ATCC 208821 / CBS 10515 / FGSC 9487) OX=235443 GN=TIF6 PE=3 SV=1	4	1_0_1_0_1_1_0_	0.496	0.2225	0	32	16	0	TRUE	TRUE	FALSE	CNAG_04628
P	J9VKC8	4	0	5	0	0	0	0	0.000126307	0	0.00012801	0	7.14134e-05	0	0.00160376	0.148154	0	0.111732	0	0.0423174	0	0.142878	15	0	17	0	2	0	8	0.06	0	0.046	0	0.018	0	0.058	5'-3' exoribonuclease 1 OS=Cryptococcus neoformans var. grubii serotype A (strain H99 / ATCC 208821 / CBS 10515 / FGSC 9487) OX=235443 GN=CNAG_02175 PE=3 SV=2	4	1_0_1_0_1_0_1_	0.053	0.009	0.058	32	2	8	FALSE	FALSE	FALSE
P	J9VKG0	0	0	2	0	0	0	0	0	0	0.000326222	0	0	0	0	0.191242	0	0.21899	0	0	0	0	15	0	17	0	0	0	0	0.076	0	0.086	0	0	0	0	Aspartate-tRNA(Asn) ligase OS=Cryptococcus neoformans var. grubii serotype A (strain H99 / ATCC 208821 / CBS 10515 / FGSC 9487) OX=235443 GN=CNAG_03563 PE=3 SV=2	2	1_0_1_0_0_0_0_	0.081	0	0	32	0	0	FALSE	FALSE	FALSE
P	J9VJX9	3	0	0	0	8	2	0	0.00107148	0	0	0	0.00194147	0.000794916	0	0.492794	0	1.5704	0	0.294196	0.534617	0	2	0	29	0	6	3	0	0.174	0	0.41	0	0.112	0.186	0	Small subunit ribosomal protein S19e OS=Cryptococcus neoformans var. grubii serotype A (strain H99 / ATCC 208821 / CBS 10515 / FGSC 9487) OX=235443 GN=CNAG_03000 PE=4 SV=1	4	1_0_1_0_1_1_0_	0.292	0.149	0	31	9	0	TRUE	TRUE	FALSE	CNAG_03000
P	J9VL75	36	0	62	2	39	38	2	0.0166582	0	0.0176087	0.00107326	0.00704001	0.0119142	0	4.83445	0	9	0	2.40408	2.40408	0	16	0	14	0	15	31	0	0.766	0	1	0	0.532	0.532	0	Large subunit acidic ribosomal protein P2 OS=Cryptococcus neoformans var. grubii serotype A (strain H99 / ATCC 208821 / CBS 10515 / FGSC 9487) OX=235443 GN=CNAG_05762 PE=3 SV=1	4	1_0_1_0_1_1_0_	0.883	0.532	0	30	46	0	TRUE	TRUE	FALSE	CNAG_05762
P	J9VL89	3	0	5	0	0	0	0	0.000199394	0	0.0004951	0	0.00014779	9.07669e-05	0	0.238797	0	0.124605	0	0.0543869	0.0303861	0	16	0	14	0	4	3	0	0.093	0	0.051	0	0.023	0.013	0	Non-specific serine/threonine protein kinase OS=Cryptococcus neoformans var. grubii serotype A (strain H99 / ATCC 208821 / CBS 10515 / FGSC 9487) OX=235443 GN=CNAG_05558 PE=4 SV=2	4	1_0_1_0_1_1_0_	0.072	0.018	0	30	7	0	FALSE	FALSE	FALSE
P	J9VKV8	22	0	45	3	42	53	2	0.0056661	0	0.00765047	0.00235522	0	7.42567e-05	0	0.169499	0	0.309182	0	0	0.0519619	0	6	0	24	0	0	2	0	0.068	0	0.117	0	0	0.022	0	ATP-citrate synthase OS=Cryptococcus neoformans var. grubii serotype A (strain H99 / ATCC 208821 / CBS 10515 / FGSC 9487) OX=235443 GN=CNAG_04640 PE=3 SV=1	3	1_0_1_0_0_1_0_	0.0925	0.011	0	30	2	0	FALSE	FALSE	FALSE
P	J9VL11	19	0	13	0	6	6	0	0.00334874	0	0.00118786	0	0.000489165	0.00160227	0	1.15278	0	1.58821	0	0.1508	0.428894	0	10	0	19	0	2	8	0	0.333	0	0.413	0	0.061	0.155	0	Uncharacterized protein OS=Cryptococcus neoformans var. grubii serotype A (strain H99 / ATCC 208821 / CBS 10515 / FGSC 9487) OX=235443 GN=CNAG_03959 PE=4 SV=1	4	1_0_1_0_1_1_0_	0.373	0.108	0	29	10	0	TRUE	FALSE	FALSE	CNAG_03959
P	J9VL23	6	0	7	0	2	0	0	0.00109188	0	0.000285385	0	0.000127895	0	0	0.0990058	0	0.297179	0	0.0690548	0	0	19	0	10	0	3	0	0	0.041	0	0.113	0	0.029	0	0	Coatomer subunit alpha OS=Cryptococcus neoformans var. grubii serotype A (strain H99 / ATCC 208821 / CBS 10515 / FGSC 9487) OX=235443 GN=CNAG_03554 PE=4 SV=1	3	1_0_1_0_1_0_0_	0.077	0.0145	0	29	3	0	FALSE	FALSE	FALSE
P	J9VL49	5	0	2	0	3	3	0	0.00198641	0	0.000352308	0	0.00552011	0.00452031	0	1.24388	0	1.77971	0	2.59749	2.14051	0	15	0	13	0	16	16	0	0.351	0	0.444	0	0.556	0.497	0	Small subunit ribosomal protein S13e OS=Cryptococcus neoformans var. grubii serotype A (strain H99 / ATCC 208821 / CBS 10515 / FGSC 9487) OX=235443 GN=CNAG_01153 PE=3 SV=1	4	1_0_1_0_1_1_0_	0.3975	0.5265	0	28	32	0	TRUE	TRUE	FALSE	CNAG_1153
P	J9VKI8	15	0	12	0	9	8	0	0.00259013	0	0.000779561	0	0.00217823	0.0010405	0	0.333522	0	1.26464	0	0.581248	0.644372	0	12	0	16	0	12	7	0	0.125	0	0.355	0	0.199	0.216	0	Ribosome biogenesis protein BRX1 OS=Cryptococcus neoformans var. grubii serotype A (strain H99 / ATCC 208821 / CBS 10515 / FGSC 9487) OX=235443 GN=CNAG_02382 PE=4 SV=1	4	1_0_1_0_1_1_0_	0.24	0.2075	0	28	19	0	TRUE	TRUE	FALSE	CNAG_02382
P	J9VKQ5	2	0	2	0	0	0	0	8.60129e-05	0	0.000152552	0	0	7.26754e-05	0	0.244515	0	0.0789467	0	0	0.0351422	0	23	0	5	0	0	2	0	0.095	0	0.033	0	0	0.015	0	Uncharacterized protein OS=Cryptococcus neoformans var. grubii serotype A (strain H99 / ATCC 208821 / CBS 10515 / FGSC 9487) OX=235443 GN=CNAG_03966 PE=4 SV=1	3	1_0_1_0_0_1_0_	0.064	0.0075	0	28	2	0	FALSE	FALSE	FALSE
P	J9VKN9	23	0	19	0	11	2	0	0.0108204	0	0.00684652	0	0	0	0	0.402814	0	0.64059	0	0	0	0	10	0	18	0	0	0	0	0.147	0	0.215	0	0	0	0	Glyceraldehyde-3-phosphate dehydrogenase OS=Cryptococcus neoformans var. grubii serotype A (strain H99 / ATCC 208821 / CBS 10515 / FGSC 9487) OX=235443 GN=CNAG_06699 PE=3 SV=1	2	1_0_1_0_0_0_0_	0.181	0	0	28	0	0	TRUE	FALSE	FALSE	CNAG_06699
P	J9VKK7	18	0	44	0	9	5	5	0.00579167	0	0.0173256	0	0.00170807	0	0	0	0	0.633052	0	0.633052	0	0	0	0	27	0	2	0	0	0	0	0.213	0	0.213	0	0	60S ribosomal protein L29 OS=Cryptococcus neoformans var. grubii serotype A (strain H99 / ATCC 208821 / CBS 10515 / FGSC 9487) OX=235443 GN=CNAG_03221 PE=3 SV=1	2	0_0_1_0_1_0_0_	0.1065	0.1065	0	27	2	0	FALSE	FALSE	FALSE
P	J9VKK9	2	0	2	0	0	0	0	0.000124739	0	4.42472e-05	0	0	0	0	0.230269	0	0.0964782	0	0	0	0	16	0	11	0	0	0	0	0.09	0	0.04	0	0	0	0	Uncharacterized protein OS=Cryptococcus neoformans var. grubii serotype A (strain H99 / ATCC 208821 / CBS 10515 / FGSC 9487) OX=235443 GN=CNAG_00547 PE=4 SV=2	2	1_0_1_0_0_0_0_	0.065	0	0	27	0	0	FALSE	FALSE	FALSE
P	J9VKK2	8	0	9	0	15	14	0	0.00392185	0	0.00241133	0	0.000305549	0	0	0.285287	0	1.60615	0	0.0764652	0	0	9	0	17	0	2	0	0	0.109	0	0.416	0	0.032	0	0	Eukaryotic translation initiation factor 3 subunit I OS=Cryptococcus neoformans var. grubii serotype A (strain H99 / ATCC 208821 / CBS 10515 / FGSC 9487) OX=235443 GN=TIF34 PE=3 SV=1	3	1_0_1_0_1_0_0_	0.2625	0.016	0	26	2	0	TRUE	FALSE	FALSE	CNAG_00602
P	J9VLG2	2	0	3	0	0	0	0	0.00021	0	0.000521435	0	0.000151662	0	0	0.321296	0	0.452112	0	0.114295	0	0	19	0	7	0	2	0	0	0.121	0	0.162	0	0.047	0	0	Transketolase OS=Cryptococcus neoformans var. grubii serotype A (strain H99 / ATCC 208821 / CBS 10515 / FGSC 9487) OX=235443 GN=CNAG_07445 PE=3 SV=1	3	1_0_1_0_1_0_0_	0.1415	0.0235	0	26	2	0	TRUE	FALSE	FALSE	CNAG_07445
P	J9VLG8	0	0	0	0	0	2	0	0	0	0	0	0	0	0	0.285287	0	0.659587	0	0	0	0	8	0	18	0	0	0	0	0.109	0	0.22	0	0	0	0	ATP-binding cassette, subfamily F, member 2 OS=Cryptococcus neoformans var. grubii serotype A (strain H99 / ATCC 208821 / CBS 10515 / FGSC 9487) OX=235443 GN=CNAG_00891 PE=4 SV=1	2	1_0_1_0_0_0_0_	0.1645	0	0	26	0	0	TRUE	FALSE	FALSE	CNAG_00891
P	J9VLC9	4	0	2	0	0	0	0	0.00038517	0	0.000227711	0	0.00136695	0.00111937	0	0.247383	0	0.588547	0	0.324342	0.216186	0	3	0	21	0	9	9	0	0.096	0	0.201	0	0.122	0.085	0	Protein MAK16 OS=Cryptococcus neoformans var. grubii serotype A (strain H99 / ATCC 208821 / CBS 10515 / FGSC 9487) OX=235443 GN=CNAG_05755 PE=3 SV=1	4	1_0_1_0_1_1_0_	0.1485	0.1035	0	24	18	0	FALSE	FALSE	FALSE
P	J9VLG1	0	0	2	0	0	0	0	0	0	0.000187977	0	0.000316693	0.000172889	0	0.0964782	0	0.172195	0	0.161449	0.106624	0	14	0	10	0	6	4	0	0.04	0	0.069	0	0.065	0.044	0	Trehalose-6-phosphate phosphatase OS=Cryptococcus neoformans var. grubii serotype A (strain H99 / ATCC 208821 / CBS 10515 / FGSC 9487) OX=235443 GN=TPS2 PE=1 SV=1	4	1_0_1_0_1_1_0_	0.0545	0.0545	0	24	10	0	FALSE	FALSE	FALSE
P	J9VLB9	7	0	10	0	0	2	0	0.000497646	0	0.000941462	0	0.000200062	9.8296e-05	0	0.0185914	0	0.0185914	0	0.0185914	0.0185914	0	6	0	18	0	5	3	0	0.008	0	0.008	0	0.008	0.008	0	Pre-mRNA-splicing factor ATP-dependent RNA helicase PRP16 OS=Cryptococcus neoformans var. grubii serotype A (strain H99 / ATCC 208821 / CBS 10515 / FGSC 9487) OX=235443 GN=CNAG_02303 PE=4 SV=2	4	1_0_1_0_1_1_0_	0.008	0.008	0	24	8	0	FALSE	FALSE	FALSE
P	J9VLH8	2	0	7	0	3	0	0	0.000178642	0	0.000470731	0	0	0.000260655	0	0.422329	0	0.94536	0	0	0.0789467	0	6	0	18	0	0	3	0	0.153	0	0.289	0	0	0.033	0	6-phosphogluconate dehydrogenase, decarboxylating OS=Cryptococcus neoformans var. grubii serotype A (strain H99 / ATCC 208821 / CBS 10515 / FGSC 9487) OX=235443 GN=CNAG_07561 PE=3 SV=1	3	1_0_1_0_0_1_0_	0.221	0.0165	0	24	3	0	TRUE	FALSE	FALSE	CNAG_07561
P	J9VLZ3	0	0	0	0	3	0	0	0	0	0	0	0.0101927	0.0154567	0.00847783	0.327394	1.01372	2.80189	0.761976	1.86418	2.4914	1.11836	7	5	16	7	27	50	4	0.123	0.304	0.58	0.246	0.457	0.543	0.326	Large subunit ribosomal protein L23 OS=Cryptococcus neoformans var. grubii serotype A (strain H99 / ATCC 208821 / CBS 10515 / FGSC 9487) OX=235443 GN=CNAG_01976 PE=3 SV=1	7	1_1_1_1_1_1_1_	0.3515	0.5	0.326	23	77	4	FALSE	FALSE	FALSE
P	J9VLX7	0	0	3	0	0	2	0	0	0	0.000324423	0	0.00339757	0.000618268	0	1.08449	0.374042	1.58821	0.306171	0.374042	0.161449	0	4	11	19	30	9	2	0	0.319	0.138	0.413	0.116	0.138	0.065	0	Histone H3 OS=Cryptococcus neoformans var. grubii serotype A (strain H99 / ATCC 208821 / CBS 10515 / FGSC 9487) OX=235443 GN=CNAG_06745 PE=3 SV=1	6	1_1_1_1_1_1_0_	0.366	0.1015	0	23	11	0	FALSE	FALSE	FALSE
P	P27710	0	0	2	0	0	0	2	0	0	7.44907e-05	0	0	0	0	0.0616956	0	0.145513	0	0	0	0	4	0	19	0	0	0	0	0.026	0	0.059	0	0	0	0	Bacteriophytochrome histidine kinase, variant OS=Cryptococcus neoformans var. grubii serotype A (strain H99 / ATCC 208821 / CBS 10515 / FGSC 9487) OX=235443 GN=CNAG_01988 PE=4 SV=1	2	1_0_1_0_0_0_0_	0.0425	0	0	23	0	0	FALSE	FALSE	FALSE
P	J9VLW1	7	0	4	0	0	0	0	0.00193013	0	0.000622411	0	0	0	0	0.412538	0	0.321296	0	0	0	0	17	0	6	0	0	0	0	0.15	0	0.121	0	0	0	0	STE/STE20/YSK protein kinase OS=Cryptococcus neoformans var. grubii serotype A (strain H99 / ATCC 208821 / CBS 10515 / FGSC 9487) OX=235443 GN=CNAG_05274 PE=4 SV=2	2	1_0_1_0_0_0_0_	0.1355	0	0	23	0	0	TRUE	FALSE	FALSE	CNAG_05274
P	J9VLR0	0	0	0	0	0	0	3	0	0	0	0	0.000154817	0	0	0.124605	0	0.0375284	0	0.0739894	0	0	19	0	3	0	2	0	0	0.051	0	0.016	0	0.031	0	0	Uncharacterized protein OS=Cryptococcus neoformans var. grubii serotype A (strain H99 / ATCC 208821 / CBS 10515 / FGSC 9487) OX=235443 GN=CNAG_04301 PE=4 SV=2	3	1_0_1_0_1_0_0_	0.0335	0.0155	0	22	2	0	FALSE	FALSE	FALSE
P	J9VM30	2	0	3	0	0	0	0	0.000366687	0	0.000346855	0	0	0	0	0.0990058	0	0.336596	0	0	0	0	4	0	18	0	0	0	0	0.041	0	0.126	0	0	0	0	Ubiquitin carboxyl-terminal hydrolase Ubp16 OS=Cryptococcus neoformans var. grubii serotype A (strain H99 / ATCC 208821 / CBS 10515 / FGSC 9487) OX=235443 GN=CNAG_00455 PE=3 SV=2	2	1_0_1_0_0_0_0_	0.0835	0	0	22	0	0	FALSE	FALSE	FALSE
P	J9VM36	0	0	4	0	0	0	2	0	0	0.000244616	0	0	0	0	0.0616956	0	0.129796	0	0	0	0	4	0	18	0	0	0	0	0.026	0	0.053	0	0	0	0	Bacteriophytochrome histidine kinase OS=Cryptococcus neoformans var. grubii serotype A (strain H99 / ATCC 208821 / CBS 10515 / FGSC 9487) OX=235443 GN=CNAG_01988 PE=4 SV=2	2	1_0_1_0_0_0_0_	0.0395	0	0	22	0	0	FALSE	FALSE	FALSE
P	J9VM66	40	3	40	5	26	52	0	0.0127915	0.00436178	0.00683407	0.00813963	0	0	0	0.324342	0	0.393157	0	0	0	0	5	0	16	0	0	0	0	0.122	0	0.144	0	0	0	0	Peptide alpha-N-acetyltransferase OS=Cryptococcus neoformans var. grubii serotype A (strain H99 / ATCC 208821 / CBS 10515 / FGSC 9487) OX=235443 GN=CNAG_02110 PE=4 SV=2	2	1_0_1_0_0_0_0_	0.133	0	0	21	0	0	TRUE	FALSE	FALSE	CNAG_02110
P	J9VM09	6	0	0	0	0	2	0	0.0013743	0	0	0	0.00018376	0.000150478	0	0.0592537	0	0.355189	0	0.106624	0.137627	0	6	0	14	0	2	2	0	0.025	0	0.132	0	0.044	0.056	0	AGC/PKA protein kinase OS=Cryptococcus neoformans var. grubii serotype A (strain H99 / ATCC 208821 / CBS 10515 / FGSC 9487) OX=235443 GN=CNAG_04162 PE=4 SV=1	4	1_0_1_0_1_1_0_	0.0785	0.05	0	20	4	0	FALSE	FALSE	FALSE
P	J9VLP5	16	0	49	4	30	44	4	0.00411567	0	0.00811057	0.00343735	0.000155511	0	0	0.339677	0	0.506607	0	0.156112	0	0	7	0	13	0	2	0	0	0.127	0	0.178	0	0.063	0	0	Polyadenylate-binding protein OS=Cryptococcus neoformans var. grubii serotype A (strain H99 / ATCC 208821 / CBS 10515 / FGSC 9487) OX=235443 GN=CNAG_04441 PE=3 SV=1	3	1_0_1_0_1_0_0_	0.1525	0.0315	0	20	2	0	TRUE	FALSE	FALSE	CNAG_04441
P	J9VLN9	2	0	7	0	0	0	0	0.000444594	0	0.000630822	0	0	0	0	0.0990058	0	0.183042	0	0	0	0	9	0	11	0	0	0	0	0.041	0	0.073	0	0	0	0	Ribonucleoside-diphosphate reductase OS=Cryptococcus neoformans var. grubii serotype A (strain H99 / ATCC 208821 / CBS 10515 / FGSC 9487) OX=235443 GN=CNAG_02208 PE=3 SV=1	2	1_0_1_0_0_0_0_	0.057	0	0	20	0	0	FALSE	FALSE	FALSE
P	J9VLP6	0	0	6	0	4	5	2	0	0	0.000255138	0	0	0	0	0.0889301	0	0.129796	0	0	0	0	9	0	11	0	0	0	0	0.037	0	0.053	0	0	0	0	ATP-dependent RNA helicase DBP9 OS=Cryptococcus neoformans var. grubii serotype A (strain H99 / ATCC 208821 / CBS 10515 / FGSC 9487) OX=235443 GN=CNAG_06206 PE=4 SV=1	2	1_0_1_0_0_0_0_	0.045	0	0	20	0	0	FALSE	FALSE	FALSE
P	J9VMK1	10	0	9	0	3	2	0	0.000985878	0	0.000476876	0	0.00876382	0.00119609	0	0.86638	0	1.2182	0	2.06196	0.442115	0	5	0	14	0	18	3	0	0.271	0	0.346	0	0.486	0.159	0	Small subunit ribosomal protein S25e OS=Cryptococcus neoformans var. grubii serotype A (strain H99 / ATCC 208821 / CBS 10515 / FGSC 9487) OX=235443 GN=CNAG_02359 PE=4 SV=1	4	1_0_1_0_1_1_0_	0.3085	0.3225	0	19	21	0	TRUE	TRUE	FALSE	CNAG_2359
P	J9VLJ8	6	0	19	0	10	9	0	0.00166541	0	0.0027105	0	0.000555691	0.000682567	0	0.383566	0.233105	0.462177	0.145513	0.342765	0.279381	0	10	5	9	5	4	6	0	0.141	0.091	0.165	0.059	0.128	0.107	0	Actin OS=Cryptococcus neoformans var. grubii serotype A (strain H99 / ATCC 208821 / CBS 10515 / FGSC 9487) OX=235443 GN=CNAG_00483 PE=3 SV=2	6	1_1_1_1_1_1_0_	0.153	0.1175	0	19	10	0	TRUE	TRUE	FALSE	CNAG_00483
P	J9VLL1	7	0	11	0	2	6	0	0.00185352	0	0.00249841	0	0.000259831	0.000425541	0	0.370882	0	0.990673	0	0.127197	0.264736	0	8	0	11	0	2	4	0	0.137	0	0.299	0	0.052	0.102	0	ATP-dependent RNA helicase eIF4A OS=Cryptococcus neoformans var. grubii serotype A (strain H99 / ATCC 208821 / CBS 10515 / FGSC 9487) OX=235443 GN=CNAG_00785 PE=4 SV=1	4	1_0_1_0_1_1_0_	0.218	0.077	0	19	6	0	TRUE	FALSE	FALSE	CNAG_00785
P	J9VLL9	2	0	0	0	0	0	0	0.000387058	0	0	0	0	0	0	0.081434	0	0.16681	0	0	0	0	8	0	11	0	0	0	0	0.034	0	0.067	0	0	0	0	GATA type zinc finger protein asd-4 OS=Cryptococcus neoformans var. grubii serotype A (strain H99 / ATCC 208821 / CBS 10515 / FGSC 9487) OX=235443 GN=CNAG_00193 PE=4 SV=1	2	1_0_1_0_0_0_0_	0.0505	0	0	19	0	0	FALSE	FALSE	FALSE
P	J9VMH3	0	0	0	0	3	4	0	0	0	0	0	0	0	0	0.109175	0	0.114295	0	0	0	0	13	0	6	0	0	0	0	0.045	0	0.047	0	0	0	0	Exocyst complex component 4 (Fragment) OS=Cryptococcus neoformans var. grubii serotype A (strain H99 / ATCC 208821 / CBS 10515 / FGSC 9487) OX=235443 GN=CNAG_05518 PE=4 SV=2	2	1_0_1_0_0_0_0_	0.046	0	0	19	0	0	FALSE	FALSE	FALSE
P	J9VMK9	0	0	2	0	0	0	0	0	0	7.53322e-05	0	0	0	0	0.101539	0	0.1324	0	0	0	0	7	0	12	0	0	0	0	0.042	0	0.054	0	0	0	0	DNA-directed RNA polymerase subunit OS=Cryptococcus neoformans var. grubii serotype A (strain H99 / ATCC 208821 / CBS 10515 / FGSC 9487) OX=235443 GN=CNAG_01189 PE=3 SV=1	2	1_0_1_0_0_0_0_	0.048	0	0	19	0	0	FALSE	FALSE	FALSE
P	J9VMZ0	3	6	11	4	7	2	0	0.00114435	0.0217299	0.00385624	0.0276482	0.00286528	0.00255963	0	0.737801	0	0.778279	0	0.819701	0.778279	0	7	0	11	0	11	12	0	0.24	0	0.25	0	0.26	0.25	0	Large subunit ribosomal protein L24e OS=Cryptococcus neoformans var. grubii serotype A (strain H99 / ATCC 208821 / CBS 10515 / FGSC 9487) OX=235443 GN=CNAG_01812 PE=4 SV=1	4	1_0_1_0_1_1_0_	0.245	0.255	0	18	23	0	TRUE	TRUE	FALSE	CNAG_01812
P	J9VN98	0	0	5	0	2	0	0	0	0	0.00032568	0	0.00280517	0.00131263	0	0	0	0.541701	0	1.30144	0.374042	0	0	0	18	0	14	8	0	0	0	0.188	0	0.362	0.138	0	Ribosome biogenesis protein NSA2 OS=Cryptococcus neoformans var. grubii serotype A (strain H99 / ATCC 208821 / CBS 10515 / FGSC 9487) OX=235443 GN=CNAG_06127 PE=4 SV=1	3	0_0_1_0_1_1_0_	0.094	0.25	0	18	22	0	FALSE	TRUE	FALSE	CNAG_06127
P	J9VMB0	4	0	7	0	0	0	0	0.000411726	0	0.000357003	0	0.000868267	0.000474005	0	0.16681	0.14025	0.111732	0	0.161449	0.172195	0	5	2	13	0	9	6	0	0.067	0.057	0.046	0	0.065	0.069	0	ATP synthase subunit alpha OS=Cryptococcus neoformans var. grubii serotype A (strain H99 / ATCC 208821 / CBS 10515 / FGSC 9487) OX=235443 GN=CNAG_05750 PE=3 SV=1	5	1_1_1_0_1_1_0_	0.0565	0.067	0	18	15	0	FALSE	FALSE	FALSE
P	J9VMC5	0	0	4	0	0	2	0	0	0	0.000189674	0	0.00339757	0.000618268	0	0	0.374042	1.58821	0.306171	0.374042	0.161449	0	0	11	18	30	9	2	0	0	0.138	0.413	0.116	0.138	0.065	0	Histone H3 OS=Cryptococcus neoformans var. grubii serotype A (strain H99 / ATCC 208821 / CBS 10515 / FGSC 9487) OX=235443 GN=CNAG_04828 PE=3 SV=1	5	0_1_1_1_1_1_0_	0.2065	0.1015	0	18	11	0	FALSE	FALSE	FALSE
P	J9VMC0	0	0	0	0	0	2	0	0	0	0	0	0	0.000269718	0	0.185769	0	0.207814	0	0	0.122018	0	9	0	9	0	0	6	0	0.074	0	0.082	0	0	0.05	0	U3 small nucleolar RNA-associated protein 13 OS=Cryptococcus neoformans var. grubii serotype A (strain H99 / ATCC 208821 / CBS 10515 / FGSC 9487) OX=235443 GN=CNAG_02982 PE=4 SV=2	3	1_0_1_0_0_1_0_	0.078	0.025	0	18	6	0	FALSE	FALSE	FALSE
P	J9VMY2	0	0	4	0	0	2	0	0	0	0.000205729	0	7.64432e-05	0	0	0.270574	0	0.0280163	0	0.0471286	0	0	10	0	8	0	2	0	0	0.104	0	0.012	0	0.02	0	0	Uncharacterized protein OS=Cryptococcus neoformans var. grubii serotype A (strain H99 / ATCC 208821 / CBS 10515 / FGSC 9487) OX=235443 GN=CNAG_07605 PE=4 SV=1	3	1_0_1_0_1_0_0_	0.058	0.01	0	18	2	0	FALSE	FALSE	FALSE
P	J9VMZ9	0	0	2	0	0	0	0	0	0	0.000811841	0	0	7.13983e-05	0	0.273503	0	0.119438	0	0	0.0543869	0	11	0	7	0	0	2	0	0.105	0	0.049	0	0	0.023	0	Uncharacterized protein OS=Cryptococcus neoformans var. grubii serotype A (strain H99 / ATCC 208821 / CBS 10515 / FGSC 9487) OX=235443 GN=CNAG_03479 PE=4 SV=2	3	1_0_1_0_0_1_0_	0.077	0.0115	0	18	2	0	FALSE	FALSE	FALSE
P	J9VMD3	15	0	23	0	16	8	0	0.00337657	0	0.00285613	0	0	0	0	0.207814	0	0.327394	0	0	0	0	15	0	3	0	0	0	0	0.082	0	0.123	0	0	0	0	DNA topoisomerase 2-associated protein PAT1 OS=Cryptococcus neoformans var. grubii serotype A (strain H99 / ATCC 208821 / CBS 10515 / FGSC 9487) OX=235443 GN=CNAG_00665 PE=4 SV=1	2	1_0_1_0_0_0_0_	0.1025	0	0	18	0	0	FALSE	FALSE	FALSE
P	J9VMF7	0	0	4	0	0	0	0	0	0	0.000296386	0	0	0	0	0.0839269	0	0.119438	0	0	0	0	4	0	14	0	0	0	0	0.035	0	0.049	0	0	0	0	Aconitate hydratase, mitochondrial OS=Cryptococcus neoformans var. grubii serotype A (strain H99 / ATCC 208821 / CBS 10515 / FGSC 9487) OX=235443 GN=CNAG_01137 PE=3 SV=1	2	1_0_1_0_0_0_0_	0.042	0	0	18	0	0	FALSE	FALSE	FALSE
P	J9VN76	15	0	31	0	0	4	0	0.000860417	0	0.001033	0	0	0.000467939	0.00106942	0.164126	0	1.0893	0	0	0.455459	0.0839269	3	0	14	0	0	6	2	0.066	0	0.32	0	0	0.163	0.035	ATP synthase subunit beta OS=Cryptococcus neoformans var. grubii serotype A (strain H99 / ATCC 208821 / CBS 10515 / FGSC 9487) OX=235443 GN=CNAG_05918 PE=3 SV=1	4	1_0_1_0_0_1_1_	0.193	0.0815	0.035	17	6	2	FALSE	FALSE	FALSE
P	J9VN81	3	0	0	0	0	0	0	5.90427e-05	0	0	0	0.000493801	0	0	0.465548	0	0.599558	0	0.258925	0	0	4	0	13	0	2	0	0	0.166	0	0.204	0	0.1	0	0	GTP-binding nuclear protein OS=Cryptococcus neoformans var. grubii serotype A (strain H99 / ATCC 208821 / CBS 10515 / FGSC 9487) OX=235443 GN=CNAG_02257 PE=3 SV=1	3	1_0_1_0_1_0_0_	0.185	0.05	0	17	2	0	TRUE	FALSE	FALSE	CNAG_02257
P	J9VMW1	3	0	0	0	0	0	0	0.000139177	0	0	0	0	0	0.000615111	0.122018	0	0.0592537	0	0	0	0.0519619	12	0	5	0	0	0	2	0.05	0	0.025	0	0	0	0.022	U3 small nucleolar RNA-associated protein 21 OS=Cryptococcus neoformans var. grubii serotype A (strain H99 / ATCC 208821 / CBS 10515 / FGSC 9487) OX=235443 GN=CNAG_07439 PE=4 SV=2	3	1_0_1_0_0_0_1_	0.0375	0	0.022	17	0	2	FALSE	FALSE	FALSE
P	J9VN60	0	0	4	0	0	0	0	0	0	0.000772648	0	0	0	0	0.114295	0	0.0889301	0	0	0	0	6	0	11	0	0	0	0	0.047	0	0.037	0	0	0	0	Uncharacterized protein OS=Cryptococcus neoformans var. grubii serotype A (strain H99 / ATCC 208821 / CBS 10515 / FGSC 9487) OX=235443 GN=CNAG_00737 PE=4 SV=1	2	1_0_1_0_0_0_0_	0.042	0	0	17	0	0	FALSE	FALSE	FALSE
P	J9VN70	3	0	7	0	3	2	0	0.000146765	0	0.000286332	0	0	0	0	0.0764652	0	0.0739894	0	0	0	0	7	0	10	0	0	0	0	0.032	0	0.031	0	0	0	0	Separase OS=Cryptococcus neoformans var. grubii serotype A (strain H99 / ATCC 208821 / CBS 10515 / FGSC 9487) OX=235443 GN=CNAG_07463 PE=4 SV=2	2	1_0_1_0_0_0_0_	0.0315	0	0	17	0	0	FALSE	FALSE	FALSE
P	J9VN14	6	0	19	0	11	4	0	0.00139484	0	0.00120467	0	0	0	0	0.0789467	0	0.0519619	0	0	0	0	14	0	3	0	0	0	0	0.033	0	0.022	0	0	0	0	ATP-dependent RNA helicase DRS1 OS=Cryptococcus neoformans var. grubii serotype A (strain H99 / ATCC 208821 / CBS 10515 / FGSC 9487) OX=235443 GN=CNAG_01140 PE=4 SV=1	2	1_0_1_0_0_0_0_	0.0275	0	0	17	0	0	FALSE	FALSE	FALSE
P	J9VMP7	16	0	39	0	0	0	4	0.00154945	0	0.00277007	0	0	0	0	0.0519619	0	0.193988	0	0	0	0	3	0	14	0	0	0	0	0.022	0	0.077	0	0	0	0	Uncharacterized protein OS=Cryptococcus neoformans var. grubii serotype A (strain H99 / ATCC 208821 / CBS 10515 / FGSC 9487) OX=235443 GN=CNAG_06278 PE=4 SV=2	2	1_0_1_0_0_0_0_	0.0495	0	0	17	0	0	FALSE	FALSE	FALSE
P	J9VMQ3	0	0	0	0	0	2	0	0	0	0	0	0	0	0	0	0	0.0789467	0	0	0	0	0	0	17	0	0	0	0	0	0	0.033	0	0	0	0	Uncharacterized protein OS=Cryptococcus neoformans var. grubii serotype A (strain H99 / ATCC 208821 / CBS 10515 / FGSC 9487) OX=235443 GN=CNAG_05609 PE=4 SV=2	1	0_0_1_0_0_0_0_	0.0165	0	0	17	0	0	FALSE	FALSE	FALSE
P	J9VMM3	3	0	5	0	2	3	0	0.00019658	0	0.000162705	0	0.000321581	0.000438894	0	0.538155	0	0.285287	0	0.273503	0.0375284	0	7	0	9	0	3	5	0	0.187	0	0.109	0	0.105	0.016	0	Ribosome biogenesis protein YTM1 OS=Cryptococcus neoformans var. grubii serotype A (strain H99 / ATCC 208821 / CBS 10515 / FGSC 9487) OX=235443 GN=YTM1 PE=3 SV=1	4	1_0_1_0_1_1_0_	0.148	0.0605	0	16	8	0	TRUE	FALSE	FALSE
P	J9VN41	2	0	3	0	0	0	0	0.000128914	0	6.85923e-05	0	0.000194026	0.000238327	0	0.227439	0	0.496236	0	0.0839269	0.1324	0	5	0	11	0	2	3	0	0.089	0	0.175	0	0.035	0.054	0	ATP-dependent RNA helicase DBP2-A OS=Cryptococcus neoformans var. grubii serotype A (strain H99 / ATCC 208821 / CBS 10515 / FGSC 9487) OX=235443 GN=CNAG_07676 PE=3 SV=2	4	1_0_1_0_1_1_0_	0.132	0.0445	0	16	5	0	FALSE	FALSE	FALSE
P	J9VN30	3	0	5	0	0	0	0	0.000364992	0	0.000258938	0	0	0	0	0.8281	0	1.19786	0	0	0	0	11	0	5	0	0	0	0	0.262	0	0.342	0	0	0	0	H/ACA ribonucleoprotein complex subunit 2 OS=Cryptococcus neoformans var. grubii serotype A (strain H99 / ATCC 208821 / CBS 10515 / FGSC 9487) OX=235443 GN=CNAG_02378 PE=4 SV=1	2	1_0_1_0_0_0_0_	0.302	0	0	16	0	0	TRUE	FALSE	FALSE	CNAG_02378
P	J9VN46	0	0	2	0	0	0	0	0	0	0.000175327	0	0	0	0	0.30017	0	0.513561	0	0	0	0	5	0	11	0	0	0	0	0.114	0	0.18	0	0	0	0	Phenylalanine-tRNA ligase, alpha subunit OS=Cryptococcus neoformans var. grubii serotype A (strain H99 / ATCC 208821 / CBS 10515 / FGSC 9487) OX=235443 GN=CNAG_04800 PE=4 SV=1	2	1_0_1_0_0_0_0_	0.147	0	0	16	0	0	TRUE	FALSE	FALSE
P	J9VMM1	25	2	31	0	37	26	6	0.0153856	0.00400899	0.0175053	0	0	0	0	0.0939563	0	0.0939563	0	0	0	0	8	0	8	0	0	0	0	0.039	0	0.039	0	0	0	0	Fatty acid synthase subunit beta, fungi type OS=Cryptococcus neoformans var. grubii serotype A (strain H99 / ATCC 208821 / CBS 10515 / FGSC 9487) OX=235443 GN=CNAG_02099 PE=4 SV=1	2	1_0_1_0_0_0_0_	0.039	0	0	16	0	0	FALSE	FALSE	FALSE
P	J9VN05	0	0	3	0	0	0	0	0	0	0.000221236	0	0.000496153	0.000203145	0	0.435489	0	0.527566	0	0.169499	0.116863	0	5	0	10	0	6	3	0	0.157	0	0.184	0	0.068	0.048	0	Pescadillo homolog OS=Cryptococcus neoformans var. grubii serotype A (strain H99 / ATCC 208821 / CBS 10515 / FGSC 9487) OX=235443 GN=NOP7 PE=3 SV=1	4	1_0_1_0_1_1_0_	0.1705	0.058	0	15	9	0	TRUE	FALSE	FALSE
P	J9VMN2	18	0	23	0	16	14	2	0.00675045	0	0.00914267	0	0.000145384	7.93683e-05	0	0.129796	0	0.196741	0	0.0543869	0.0256519	0	4	0	11	0	3	2	0	0.053	0	0.078	0	0.023	0.011	0	NET1-associated nuclear protein 1 (U3 small nucleolar RNA-associated protein 17), variant OS=Cryptococcus neoformans var. grubii serotype A (strain H99 / ATCC 208821 / CBS 10515 / FGSC 9487) OX=235443 GN=CNAG_03645 PE=4 SV=1	4	1_0_1_0_1_1_0_	0.0655	0.017	0	15	5	0	FALSE	FALSE	FALSE
P	J9VN06	3	0	0	0	2	0	0	0.00107347	0	0	0	0.000174429	9.52242e-05	0	0.177606	0	0.213389	0	0.0423174	0.0616956	0	6	0	9	0	3	2	0	0.071	0	0.084	0	0.018	0.026	0	Uncharacterized protein OS=Cryptococcus neoformans var. grubii serotype A (strain H99 / ATCC 208821 / CBS 10515 / FGSC 9487) OX=235443 GN=CNAG_06916 PE=4 SV=1	4	1_0_1_0_1_1_0_	0.0775	0.022	0	15	5	0	FALSE	FALSE	FALSE
P	J9VNJ4	0	0	2	0	0	0	0	0	0	0.000146641	0	9.65934e-05	5.27323e-05	0	0.0839269	0	0.0423174	0	0.0592537	0.0280163	0	8	0	7	0	3	2	0	0.035	0	0.018	0	0.025	0.012	0	Uncharacterized protein OS=Cryptococcus neoformans var. grubii serotype A (strain H99 / ATCC 208821 / CBS 10515 / FGSC 9487) OX=235443 GN=CNAG_06971 PE=3 SV=2	4	1_0_1_0_1_1_0_	0.0265	0.0185	0	15	5	0	FALSE	FALSE	FALSE
P	J9VNM6	19	0	23	0	17	10	3	0.0019176	0	0.00160049	0	0.000145249	7.92945e-05	0	0.129796	0	0.196741	0	0.0543869	0.0256519	0	4	0	11	0	3	2	0	0.053	0	0.078	0	0.023	0.011	0	NET1-associated nuclear protein 1 (U3 small nucleolar RNA-associated protein 17) OS=Cryptococcus neoformans var. grubii serotype A (strain H99 / ATCC 208821 / CBS 10515 / FGSC 9487) OX=235443 GN=CNAG_03645 PE=4 SV=2	4	1_0_1_0_1_1_0_	0.0655	0.017	0	15	5	0	FALSE	FALSE	FALSE
P	J9VMN1	8	0	0	0	0	0	0	0.00116689	0	0	0	0	5.4857e-05	0	0.0423174	0	0.0990058	0	0	0.0351422	0	3	0	12	0	0	3	0	0.018	0	0.041	0	0	0.015	0	Carbamoyl-phosphate synthase, large subunit OS=Cryptococcus neoformans var. grubii serotype A (strain H99 / ATCC 208821 / CBS 10515 / FGSC 9487) OX=235443 GN=CNAG_07373 PE=3 SV=1	3	1_0_1_0_0_1_0_	0.0295	0.0075	0	15	3	0	FALSE	FALSE	FALSE
P	J9VNJ0	5	0	3	0	0	0	0	0.000671047	0	0.000119016	0	0	0	0	0.161449	0	0.428894	0	0	0	0	5	0	10	0	0	0	0	0.065	0	0.155	0	0	0	0	Nucleolin OS=Cryptococcus neoformans var. grubii serotype A (strain H99 / ATCC 208821 / CBS 10515 / FGSC 9487) OX=235443 GN=CNAG_07362 PE=4 SV=1	2	1_0_1_0_0_0_0_	0.11	0	0	15	0	0	FALSE	FALSE	FALSE
P	J9VNF3	5	0	13	0	12	4	0	0.000568056	0	0.001209	0	0	0	0	0.409289	0	0.135011	0	0	0	0	12	0	3	0	0	0	0	0.149	0	0.055	0	0	0	0	Glutamine-fructose-6-phosphate transaminase (Isomerizing) OS=Cryptococcus neoformans var. grubii serotype A (strain H99 / ATCC 208821 / CBS 10515 / FGSC 9487) OX=235443 GN=CNAG_01164 PE=4 SV=1	2	1_0_1_0_0_0_0_	0.102	0	0	15	0	0	FALSE	FALSE	FALSE
P	J9VNG8	17	0	20	0	16	7	0	0.00547986	0	0.00256229	0	0	0	0	0	0	0.153453	0	0	0	0	0	0	15	0	0	0	0	0	0	0.062	0	0	0	0	Alpha-ketoglutarate catabolism dioxygenase OS=Cryptococcus neoformans var. grubii serotype A (strain H99 / ATCC 208821 / CBS 10515 / FGSC 9487) OX=235443 GN=CNAG_03389 PE=4 SV=2	1	0_0_1_0_0_0_0_	0.031	0	0	15	0	0	FALSE	FALSE	FALSE
P	J9VNG9	2	3	2	0	2	0	0	0.000724402	0.00500205	0.000256959	0	0	0	0	0.0519619	0	0.101539	0	0	0	0	6	0	8	0	0	0	0	0.022	0	0.042	0	0	0	0	Transketolase, variant OS=Cryptococcus neoformans var. grubii serotype A (strain H99 / ATCC 208821 / CBS 10515 / FGSC 9487) OX=235443 GN=CNAG_03040 PE=4 SV=2	2	1_0_1_0_0_0_0_	0.032	0	0	14	0	0	FALSE	FALSE	FALSE
P	J9VNH9	3	0	4	0	0	0	0	0.000123503	0	0.000204442	0	0	0	0	0.111732	0	0.0990058	0	0	0	0	4	0	10	0	0	0	0	0.046	0	0.041	0	0	0	0	DNA replication licensing factor MCM7 OS=Cryptococcus neoformans var. grubii serotype A (strain H99 / ATCC 208821 / CBS 10515 / FGSC 9487) OX=235443 GN=MCM7 PE=3 SV=1	2	1_0_1_0_0_0_0_	0.0435	0	0	14	0	0	FALSE	FALSE	FALSE
P	J9VNC7	0	0	3	0	0	0	0	0	0	6.74362e-05	0	0	0	0	0.106624	0	0.124605	0	0	0	0	6	0	8	0	0	0	0	0.044	0	0.051	0	0	0	0	Cytoplasmic protein OS=Cryptococcus neoformans var. grubii serotype A (strain H99 / ATCC 208821 / CBS 10515 / FGSC 9487) OX=235443 GN=CNAG_02079 PE=4 SV=1	2	1_0_1_0_0_0_0_	0.0475	0	0	14	0	0	FALSE	FALSE	FALSE
P	J9VNN2	2	0	0	0	0	2	0	0.000344803	0	0	0	0.00160072	0.000595817	0	0.352073	0	0.267652	0	0.725838	0.2218	0	5	0	8	0	11	5	0	0.131	0	0.103	0	0.237	0.087	0	Ribosome biogenesis protein UTP30 OS=Cryptococcus neoformans var. grubii serotype A (strain H99 / ATCC 208821 / CBS 10515 / FGSC 9487) OX=235443 GN=CNAG_06535 PE=4 SV=1	4	1_0_1_0_1_1_0_	0.117	0.162	0	13	16	0	TRUE	FALSE	FALSE	CNAG_06535
P	J9VND8	0	0	3	0	0	0	0	0	0	0.000154105	0	0.00097884	0.000178123	0	0.199499	0	0	0	0.503142	0.0399202	0	13	0	0	0	9	2	0	0.079	0	0	0	0.177	0.017	0	Nucleolar protein 15 OS=Cryptococcus neoformans var. grubii serotype A (strain H99 / ATCC 208821 / CBS 10515 / FGSC 9487) OX=235443 GN=CNAG_07511 PE=4 SV=1	3	1_0_0_0_1_1_0_	0.0395	0.097	0	13	11	0	FALSE	FALSE	FALSE
P	J9VNY5	0	0	0	0	0	2	0	0	0	0	0	0.00209783	0	0	0.566751	0	2.14051	0	0.798871	0	0	6	0	7	0	6	0	0	0.195	0	0.497	0	0.255	0	0	Ubiquinol-cytochrome c reductase subunit 7 OS=Cryptococcus neoformans var. grubii serotype A (strain H99 / ATCC 208821 / CBS 10515 / FGSC 9487) OX=235443 GN=CNAG_01323 PE=4 SV=1	3	1_0_1_0_1_0_0_	0.346	0.1275	0	13	6	0	TRUE	FALSE	FALSE
P	J9VNA7	4	0	2	0	2	0	0	0.000189125	0	0.000134172	0	8.64665e-05	0.000106209	0	0.0990058	0	0.104079	0	0.0519619	0.0616956	0	6	0	7	0	2	3	0	0.041	0	0.043	0	0.022	0.026	0	Cyclin binding protein OS=Cryptococcus neoformans var. grubii serotype A (strain H99 / ATCC 208821 / CBS 10515 / FGSC 9487) OX=235443 GN=CNAG_02341 PE=4 SV=1	4	1_0_1_0_1_1_0_	0.042	0.024	0	13	5	0	FALSE	FALSE	FALSE
P	J9VNC9	0	0	3	0	0	0	0	0	0	8.27023e-05	0	0	0.000322574	0	0.321296	0	0.435489	0	0	0.244515	0	6	0	7	0	0	4	0	0.121	0	0.157	0	0	0.095	0	Pyruvate kinase OS=Cryptococcus neoformans var. grubii serotype A (strain H99 / ATCC 208821 / CBS 10515 / FGSC 9487) OX=235443 GN=CNAG_01820 PE=3 SV=1	3	1_0_1_0_0_1_0_	0.139	0.0475	0	13	4	0	TRUE	FALSE	FALSE	CNAG_01820
P	J9VP07	0	0	2	0	0	0	0	0	0	0.000235366	0	0.000306899	0	0	0.238797	0	0.0964782	0	0.0964782	0	0	10	0	3	0	4	0	0	0.093	0	0.04	0	0.04	0	0	Glucose-regulated protein OS=Cryptococcus neoformans var. grubii serotype A (strain H99 / ATCC 208821 / CBS 10515 / FGSC 9487) OX=235443 GN=CNAG_06443 PE=3 SV=1	3	1_0_1_0_1_0_0_	0.0665	0.02	0	13	4	0	FALSE	FALSE	FALSE
P	J9W0I6	25	0	30	2	34	32	0	0.0109115	0	0.0126672	0.00127821	0	0.000298325	0	0.294196	0	0.396368	0	0	0.2218	0	6	0	7	0	0	4	0	0.112	0	0.145	0	0	0.087	0	Pyruvate kinase OS=Cryptococcus neoformans var. grubii serotype A (strain H99 / ATCC 208821 / CBS 10515 / FGSC 9487) OX=235443 GN=CNAG_01820 PE=3 SV=2	3	1_0_1_0_0_1_0_	0.1285	0.0435	0	13	4	0	TRUE	FALSE	FALSE	CNAG_01820
P	J9VNZ3	0	0	8	0	0	0	0	0	0	0.000162959	0	0.00104192	0	0	1.22331	0	0.559552	0.258925	0.402814	0	0	5	0	8	3	3	0	0	0.347	0	0.193	0.1	0.147	0	0	Small subunit ribosomal protein S15 OS=Cryptococcus neoformans var. grubii serotype A (strain H99 / ATCC 208821 / CBS 10515 / FGSC 9487) OX=235443 GN=CNAG_06633 PE=3 SV=1	4	1_0_1_1_1_0_0_	0.27	0.0735	0	13	3	0	TRUE	FALSE	FALSE	CNAG_06633
P	J9VNW6	4	0	5	2	2	0	0	0.001316	0	0.00149379	0.00254364	0	0.000106385	0	0.142878	0	0.191242	0	0	0.0399202	0	4	0	9	0	0	3	0	0.058	0	0.076	0	0	0.017	0	Pyruvate carboxylase OS=Cryptococcus neoformans var. grubii serotype A (strain H99 / ATCC 208821 / CBS 10515 / FGSC 9487) OX=235443 GN=CNAG_05907 PE=4 SV=2	3	1_0_1_0_0_1_0_	0.067	0.0085	0	13	3	0	FALSE	FALSE	FALSE
P	J9VNN9	10	0	13	0	11	19	0	0.0056908	0	0.0035326	0	0	0.000105075	0	0.276439	0	0.233105	0	0	0.0641431	0	8	0	5	0	0	2	0	0.106	0	0.091	0	0	0.027	0	Pre-rRNA-processing protein TSR1 OS=Cryptococcus neoformans var. grubii serotype A (strain H99 / ATCC 208821 / CBS 10515 / FGSC 9487) OX=235443 GN=CNAG_02328 PE=4 SV=2	3	1_0_1_0_0_1_0_	0.0985	0.0135	0	13	2	0	FALSE	FALSE	FALSE
P	J9VND0	13	55	27	14	33	36	23	0.00185062	0.0463818	0.00238267	0.00750726	0	0	0	0.0690548	0	0.0690548	0	0	0	0	6	0	7	0	0	0	0	0.029	0	0.029	0	0	0	0	Transketolase, variant OS=Cryptococcus neoformans var. grubii serotype A (strain H99 / ATCC 208821 / CBS 10515 / FGSC 9487) OX=235443 GN=CNAG_00866 PE=4 SV=1	2	1_0_1_0_0_0_0_	0.029	0	0	13	0	0	FALSE	FALSE	FALSE
P	J9VNT6	2	0	2	0	0	0	0	0.000204031	0	0.000289494	0	0	0	0	0.0519619	0	0.0519619	0	0	0	0	6	0	7	0	0	0	0	0.022	0	0.022	0	0	0	0	Transketolase OS=Cryptococcus neoformans var. grubii serotype A (strain H99 / ATCC 208821 / CBS 10515 / FGSC 9487) OX=235443 GN=CNAG_00866 PE=4 SV=2	2	1_0_1_0_0_0_0_	0.022	0	0	13	0	0	FALSE	FALSE	FALSE
P	J9W0K1	4	0	16	0	0	2	0	0.000206161	0	0.000585034	0	0	0	0	0.0990058	0	0.282331	0	0	0	0	4	0	9	0	0	0	0	0.041	0	0.108	0	0	0	0	Uncharacterized protein OS=Cryptococcus neoformans var. grubii serotype A (strain H99 / ATCC 208821 / CBS 10515 / FGSC 9487) OX=235443 GN=CNAG_05590 PE=4 SV=2	2	1_0_1_0_0_0_0_	0.0745	0	0	13	0	0	FALSE	FALSE	FALSE
P	J9W0B1	78	2	124	8	54	94	7	0.0188155	0.00450597	0.0183637	0.00630654	0	0	0	0.614359	0	0.44544	0	0	0	0	8	0	5	0	0	0	0	0.208	0	0.16	0	0	0	0	ADP,ATP carrier protein OS=Cryptococcus neoformans var. grubii serotype A (strain H99 / ATCC 208821 / CBS 10515 / FGSC 9487) OX=235443 GN=CNAG_06101 PE=3 SV=1	2	1_0_1_0_0_0_0_	0.184	0	0	13	0	0	TRUE	FALSE	FALSE	CNAG_06101
P	J9VPA5	13	4	12	0	12	12	0	0.0071242	0.0102486	0.00442239	0	0.000286872	0	0	0.0764652	0	0.1508	0	0.0839269	0	0	2	0	10	0	5	0	0	0.032	0	0.061	0	0.035	0	0	AdoMet-dependent rRNA methyltransferase SPB1 OS=Cryptococcus neoformans var. grubii serotype A (strain H99 / ATCC 208821 / CBS 10515 / FGSC 9487) OX=235443 GN=SPB1 PE=3 SV=1	3	1_0_1_0_1_0_0_	0.0465	0.0175	0	12	5	0	FALSE	FALSE	FALSE
P	J9VP81	15	0	15	0	15	11	7	0.00180718	0	0.000986215	0	0.000113871	0.00013987	0	0.0641431	0	0.238797	0	0.0641431	0.0764652	0	5	0	7	0	2	3	0	0.027	0	0.093	0	0.027	0.032	0	ATP-dependent 6-phosphofructokinase OS=Cryptococcus neoformans var. grubii serotype A (strain H99 / ATCC 208821 / CBS 10515 / FGSC 9487) OX=235443 GN=CNAG_04676 PE=3 SV=1	4	1_0_1_0_1_1_0_	0.06	0.0295	0	12	5	0	FALSE	FALSE	FALSE
P	J9VP93	0	0	3	0	0	0	0	0	0	0.000183302	0	0	0	0	0.0519619	0	0.202264	0	0	0	0	5	0	7	0	0	0	0	0.022	0	0.08	0	0	0	0	Proline-tRNA ligase OS=Cryptococcus neoformans var. grubii serotype A (strain H99 / ATCC 208821 / CBS 10515 / FGSC 9487) OX=235443 GN=CNAG_04082 PE=3 SV=2	2	1_0_1_0_0_0_0_	0.051	0	0	12	0	0	FALSE	FALSE	FALSE
P	J9VP91	0	0	2	0	0	0	0	0	0	0.000169748	0	0	0	0	0.111732	0	0.233105	0	0	0	0	6	0	6	0	0	0	0	0.046	0	0.091	0	0	0	0	Uncharacterized protein OS=Cryptococcus neoformans var. grubii serotype A (strain H99 / ATCC 208821 / CBS 10515 / FGSC 9487) OX=235443 GN=CNAG_02701 PE=4 SV=2	2	1_0_1_0_0_0_0_	0.0685	0	0	12	0	0	FALSE	FALSE	FALSE
P	J9VP99	0	0	2	0	0	0	0	0	0	0.000123931	0	0	0	0	0.406048	0	0	0	0	0	0	12	0	0	0	0	0	0	0.148	0	0	0	0	0	0	KRR1 small subunit processome component OS=Cryptococcus neoformans var. grubii serotype A (strain H99 / ATCC 208821 / CBS 10515 / FGSC 9487) OX=235443 GN=CNAG_01437 PE=3 SV=1	1	1_0_0_0_0_0_0_	0.074	0	0	12	0	0	FALSE	FALSE	FALSE
P	J9VP66	15	0	18	0	8	5	0	0.00152395	0	0.00185822	0	0	0	0	0.153453	0	0.0665962	0	0	0	0	4	0	8	0	0	0	0	0.062	0	0.028	0	0	0	0	Transcriptional regulator Medusa, variant OS=Cryptococcus neoformans var. grubii serotype A (strain H99 / ATCC 208821 / CBS 10515 / FGSC 9487) OX=235443 GN=CNAG_03859 PE=4 SV=1	2	1_0_1_0_0_0_0_	0.045	0	0	12	0	0	FALSE	FALSE	FALSE
P	J9VP88	4	2	7	0	5	4	0	0.000365555	0.00100967	0.000674279	0	0	0	0	0.127197	0	0.116863	0	0	0	0	3	0	9	0	0	0	0	0.052	0	0.048	0	0	0	0	U5 small nuclear ribonucleoprotein component OS=Cryptococcus neoformans var. grubii serotype A (strain H99 / ATCC 208821 / CBS 10515 / FGSC 9487) OX=235443 GN=CNAG_01091 PE=4 SV=1	2	1_0_1_0_0_0_0_	0.05	0	0	12	0	0	FALSE	FALSE	FALSE
P	J9VP17	3	0	7	0	0	2	0	0.000131272	0	0.00020954	0	0	0	0	0.129796	0	0	0	0	0	0	12	0	0	0	0	0	0	0.053	0	0	0	0	0	0	Chaperone OS=Cryptococcus neoformans var. grubii serotype A (strain H99 / ATCC 208821 / CBS 10515 / FGSC 9487) OX=235443 GN=CNAG_04348 PE=4 SV=1	1	1_0_0_0_0_0_0_	0.0265	0	0	12	0	0	FALSE	FALSE	FALSE
P	J9W0Q3	0	0	2	0	0	0	0	0	0	0.000169748	0	0	0	0	0.104079	0	0.104079	0	0	0	0	4	0	8	0	0	0	0	0.043	0	0.043	0	0	0	0	DIS3-like exonuclease 2 OS=Cryptococcus neoformans var. grubii serotype A (strain H99 / ATCC 208821 / CBS 10515 / FGSC 9487) OX=235443 GN=CNAG_03345 PE=3 SV=2	2	1_0_1_0_0_0_0_	0.043	0	0	12	0	0	FALSE	FALSE	FALSE
P	J9W1J2	2	6	4	4	2	2	0	0.000233149	0.00429309	0.000220539	0.00125179	0.0183868	0.00585536	0.01147	0.570363	1.69774	1.69774	0	1.82488	1.69774	0.570363	5	3	6	0	18	7	2	0.196	0.431	0.431	0	0.451	0.431	0.196	Large subunit ribosomal protein L39 OS=Cryptococcus neoformans var. grubii serotype A (strain H99 / ATCC 208821 / CBS 10515 / FGSC 9487) OX=235443 GN=CNAG_01455 PE=3 SV=2	6	1_1_1_0_1_1_1_	0.3135	0.441	0.196	11	25	2	FALSE	TRUE	TRUE	CNAG_01455
P	J9W146	3	0	3	0	2	0	0	0.000278028	0	8.45327e-05	0	0.00389503	0	0	0	0	1.8119	0	2.33426	0	0	0	0	11	0	8	0	0	0	0	0.449	0	0.523	0	0	Uncharacterized protein OS=Cryptococcus neoformans var. grubii serotype A (strain H99 / ATCC 208821 / CBS 10515 / FGSC 9487) OX=235443 GN=CNAG_04037 PE=4 SV=1	2	0_0_1_0_1_0_0_	0.2245	0.2615	0	11	8	0	FALSE	FALSE	FALSE
P	J9W225	2	5	11	5	15	25	4	0.0020026	0.00987723	0.00324736	0.00645125	0.00106318	0	0	0.244515	0	0.432188	0	0.244515	0	0	7	0	4	0	3	0	0	0.095	0	0.156	0	0.095	0	0	Small subunit ribosomal protein S10e OS=Cryptococcus neoformans var. grubii serotype A (strain H99 / ATCC 208821 / CBS 10515 / FGSC 9487) OX=235443 GN=CNAG_05814 PE=4 SV=1	3	1_0_1_0_1_0_0_	0.1255	0.0475	0	11	3	0	FALSE	FALSE	FALSE
P	J9VPP7	3	0	13	0	0	5	2	0.000216526	0	0.000716854	0	0	0.000270003	0	0.462177	0	0	0	0	0.0839269	0	11	0	0	0	0	2	0	0.165	0	0	0	0	0.035	0	Inorganic pyrophosphatase OS=Cryptococcus neoformans var. grubii serotype A (strain H99 / ATCC 208821 / CBS 10515 / FGSC 9487) OX=235443 GN=CNAG_02545 PE=4 SV=2	2	1_0_0_0_0_1_0_	0.0825	0.0175	0	11	2	0	FALSE	FALSE	FALSE
P	J9VPD8	0	0	0	0	0	0	2	0	0	0	0	0.000136556	0	0	0.210598	0	0.309182	0	0.0185914	0	0	6	0	5	0	2	0	0	0.083	0	0.117	0	0.008	0	0	5-methyltetrahydropteroyltriglutamate-homocysteine S-methyltransferase OS=Cryptococcus neoformans var. grubii serotype A (strain H99 / ATCC 208821 / CBS 10515 / FGSC 9487) OX=235443 GN=CNAG_01890 PE=3 SV=1	3	1_0_1_0_1_0_0_	0.1	0.004	0	11	2	0	FALSE	FALSE	FALSE
P	J9VPI4	4	0	8	0	2	2	0	0.000367597	0	0.000573731	0	0	0	0.000463526	0.104079	0	0.0964782	0	0	0	0.0789467	7	0	4	0	0	0	2	0.043	0	0.04	0	0	0	0.033	Signal transducer OS=Cryptococcus neoformans var. grubii serotype A (strain H99 / ATCC 208821 / CBS 10515 / FGSC 9487) OX=235443 GN=CNAG_04213 PE=4 SV=2	3	1_0_1_0_0_0_1_	0.0415	0	0.033	11	0	2	FALSE	FALSE	FALSE
P	J9VP24	0	0	0	0	0	2	0	0	0	0	0	0	0	0	0.106624	0	0.0889301	0	0	0	0	4	0	7	0	0	0	0	0.044	0	0.037	0	0	0	0	DIS3-like exonuclease 2 OS=Cryptococcus neoformans var. grubii serotype A (strain H99 / ATCC 208821 / CBS 10515 / FGSC 9487) OX=235443 GN=CNAG_03345 PE=3 SV=1	2	1_0_1_0_0_0_0_	0.0405	0	0	11	0	0	FALSE	FALSE	FALSE
P	J9W0R4	0	0	4	0	0	0	0	0	0	0.000166883	0	0	0	0	0	0	0.081434	0	0	0	0	0	0	11	0	0	0	0	0	0	0.034	0	0	0	0	Cytoplasmic protein OS=Cryptococcus neoformans var. grubii serotype A (strain H99 / ATCC 208821 / CBS 10515 / FGSC 9487) OX=235443 GN=CNAG_00635 PE=4 SV=2	1	0_0_1_0_0_0_0_	0.017	0	0	11	0	0	FALSE	FALSE	FALSE
P	J9W138	0	0	2	0	0	0	0	0	0	4.09182e-05	0	0	0	0	0.109175	0	0.111732	0	0	0	0	8	0	3	0	0	0	0	0.045	0	0.046	0	0	0	0	3-isopropylmalate dehydratase OS=Cryptococcus neoformans var. grubii serotype A (strain H99 / ATCC 208821 / CBS 10515 / FGSC 9487) OX=235443 GN=CNAG_00237 PE=3 SV=1	2	1_0_1_0_0_0_0_	0.0455	0	0	11	0	0	FALSE	FALSE	FALSE
P	J9VQ03	34	0	46	0	36	32	0	0.00378349	0	0.00276195	0	0	0	0	0	0	0.129796	0	0	0	0	0	0	11	0	0	0	0	0	0	0.053	0	0	0	0	Eukaryotic translation initiation factor 3 subunit D OS=Cryptococcus neoformans var. grubii serotype A (strain H99 / ATCC 208821 / CBS 10515 / FGSC 9487) OX=235443 GN=CNAG_03641 PE=3 SV=1	1	0_0_1_0_0_0_0_	0.0265	0	0	11	0	0	FALSE	FALSE	FALSE
P	J9VQ19	3	0	0	0	0	0	0	0.000207789	0	0	0	0	0	0	0.21899	0	0.114295	0	0	0	0	6	0	5	0	0	0	0	0.086	0	0.047	0	0	0	0	Uncharacterized protein OS=Cryptococcus neoformans var. grubii serotype A (strain H99 / ATCC 208821 / CBS 10515 / FGSC 9487) OX=235443 GN=CNAG_04991 PE=4 SV=1	2	1_0_1_0_0_0_0_	0.0665	0	0	11	0	0	FALSE	FALSE	FALSE
P	J9W1J3	0	0	0	0	3	0	0	0	0	0	0	0	0	0	0.164126	0	0.158777	0	0	0	0	6	0	5	0	0	0	0	0.066	0	0.064	0	0	0	0	Alpha-amylase OS=Cryptococcus neoformans var. grubii serotype A (strain H99 / ATCC 208821 / CBS 10515 / FGSC 9487) OX=235443 GN=CNAG_03146 PE=4 SV=2	2	1_0_1_0_0_0_0_	0.065	0	0	11	0	0	FALSE	FALSE	FALSE
P	J9VPK3	0	0	4	0	5	0	0	0	0	0.000657477	0	0	0	0	0.1324	0	0.101539	0	0	0	0	3	0	8	0	0	0	0	0.054	0	0.042	0	0	0	0	AP-2 complex subunit alpha OS=Cryptococcus neoformans var. grubii serotype A (strain H99 / ATCC 208821 / CBS 10515 / FGSC 9487) OX=235443 GN=CNAG_03528 PE=3 SV=1	2	1_0_1_0_0_0_0_	0.048	0	0	11	0	0	FALSE	FALSE	FALSE
P	J9VPF2	2	0	3	0	2	0	0	0.00188	0	0.000762136	0	0	0	0	0.213389	0	0.291219	0	0	0	0	6	0	5	0	0	0	0	0.084	0	0.111	0	0	0	0	Uncharacterized protein OS=Cryptococcus neoformans var. grubii serotype A (strain H99 / ATCC 208821 / CBS 10515 / FGSC 9487) OX=235443 GN=CNAG_04939 PE=4 SV=2	2	1_0_1_0_0_0_0_	0.0975	0	0	11	0	0	FALSE	FALSE	FALSE
P	J9VPG5	4	0	3	0	0	0	0	0.000422245	0	0.00024963	0	0	0	0	0.315225	0	0	0	0	0	0	11	0	0	0	0	0	0	0.119	0	0	0	0	0	0	Protein KRI1 OS=Cryptococcus neoformans var. grubii serotype A (strain H99 / ATCC 208821 / CBS 10515 / FGSC 9487) OX=235443 GN=CNAG_04376 PE=4 SV=1	1	1_0_0_0_0_0_0_	0.0595	0	0	11	0	0	FALSE	FALSE	FALSE
P	J9VPH6	0	0	2	0	0	0	0	0	0	0.0010247	0	0	0	0	0.0543869	0	0.25603	0	0	0	0	4	0	7	0	0	0	0	0.023	0	0.099	0	0	0	0	RalA-binding protein 1 OS=Cryptococcus neoformans var. grubii serotype A (strain H99 / ATCC 208821 / CBS 10515 / FGSC 9487) OX=235443 GN=CNAG_04832 PE=4 SV=1	2	1_0_1_0_0_0_0_	0.061	0	0	11	0	0	FALSE	FALSE	FALSE
P	J9W1I4	3	0	2	0	2	0	0	4.95201e-05	0	1.75657e-05	0	0	0	0	0.309182	0	0.0964782	0	0	0	0	8	0	3	0	0	0	0	0.117	0	0.04	0	0	0	0	Homoserine dehydrogenase OS=Cryptococcus neoformans var. grubii serotype A (strain H99 / ATCC 208821 / CBS 10515 / FGSC 9487) OX=235443 GN=CNAG_04776 PE=3 SV=1	2	1_0_1_0_0_0_0_	0.0785	0	0	11	0	0	FALSE	FALSE	FALSE
P	J9VPC3	3	0	0	0	0	0	0	0.000250932	0	0	0	0	0	0	0	0	0.081434	0	0	0	0	0	0	11	0	0	0	0	0	0	0.034	0	0	0	0	Dihydroxy-acid dehydratase OS=Cryptococcus neoformans var. grubii serotype A (strain H99 / ATCC 208821 / CBS 10515 / FGSC 9487) OX=235443 GN=CNAG_05497 PE=3 SV=1	1	0_0_1_0_0_0_0_	0.017	0	0	11	0	0	FALSE	FALSE	FALSE
P	J9VQC7	0	0	2	0	0	0	0	0	0	0.000186723	0	0.00414924	0.00377526	0	0	0.472312	1.40436	0	1.40436	0.566751	0	0	2	10	0	9	10	0	0	0.168	0.381	0	0.381	0.195	0	Large subunit ribosomal protein L30e OS=Cryptococcus neoformans var. grubii serotype A (strain H99 / ATCC 208821 / CBS 10515 / FGSC 9487) OX=235443 GN=CNAG_00232 PE=4 SV=1	4	0_1_1_0_1_1_0_	0.1905	0.288	0	10	19	0	FALSE	TRUE	FALSE	CNAG_00232
P	J9W1W8	0	0	0	0	3	0	0	0	0	0	0	0.000982944	0.000804914	0	0.315225	0	0.479108	0	0.188502	0.315225	0	8	0	2	0	3	3	0	0.119	0	0.17	0	0.075	0.119	0	Small subunit ribosomal protein S27Ae OS=Cryptococcus neoformans var. grubii serotype A (strain H99 / ATCC 208821 / CBS 10515 / FGSC 9487) OX=235443 GN=CNAG_01181 PE=4 SV=1	4	1_0_1_0_1_1_0_	0.1445	0.097	0	10	6	0	TRUE	FALSE	FALSE	CNAG_01181
P	J9W2P4	0	0	2	0	3	0	0	0	0	4.15248e-05	0	0.000720222	0	0	0.142878	0	0.0990058	0	0.153453	0	0	5	0	5	0	6	0	0	0.058	0	0.041	0	0.062	0	0	Ribosome production factor 1 OS=Cryptococcus neoformans var. grubii serotype A (strain H99 / ATCC 208821 / CBS 10515 / FGSC 9487) OX=235443 GN=CNAG_01791 PE=4 SV=1	3	1_0_1_0_1_0_0_	0.0495	0.031	0	10	6	0	FALSE	FALSE	FALSE
P	J9VPS2	5	0	8	0	0	5	0	0.000374414	0	0.000265623	0	0.000157232	0	0	0.0568175	0	0.109175	0	0.0280163	0	0	7	0	3	0	3	0	0	0.024	0	0.045	0	0.012	0	0	Nucleolar protein 4 OS=Cryptococcus neoformans var. grubii serotype A (strain H99 / ATCC 208821 / CBS 10515 / FGSC 9487) OX=235443 GN=CNAG_06472 PE=4 SV=1	3	1_0_1_0_1_0_0_	0.0345	0.006	0	10	3	0	FALSE	FALSE	FALSE
P	J9VPE0	5	0	17	0	13	9	0	0.00163365	0	0.00695384	0	0.000528894	0	0	0.164126	0	0.324342	0	0.324342	0	0	5	0	5	0	2	0	0	0.066	0	0.122	0	0.122	0	0	Peroxiredoxin (Alkyl hydroperoxide reductase subunit C), variant OS=Cryptococcus neoformans var. grubii serotype A (strain H99 / ATCC 208821 / CBS 10515 / FGSC 9487) OX=235443 GN=CNAG_03482 PE=4 SV=1	3	1_0_1_0_1_0_0_	0.094	0.061	0	10	2	0	FALSE	FALSE	FALSE
P	J9VQ53	11	0	8	0	6	3	0	0.000998088	0	0.000340927	0	0.000454987	0	0	0.14025	0	0.273503	0	0.273503	0	0	5	0	5	0	2	0	0	0.057	0	0.105	0	0.105	0	0	Peroxiredoxin (Alkyl hydroperoxide reductase subunit C) OS=Cryptococcus neoformans var. grubii serotype A (strain H99 / ATCC 208821 / CBS 10515 / FGSC 9487) OX=235443 GN=CNAG_03482 PE=4 SV=2	3	1_0_1_0_1_0_0_	0.081	0.0525	0	10	2	0	FALSE	FALSE	FALSE
P	J9VQB5	14	0	8	0	11	12	0	0.00173158	0	0.000393102	0	0	0	0	0	0	0.142878	0	0	0	0	0	0	10	0	0	0	0	0	0	0.058	0	0	0	0	Translation initiation factor eIF-2B subunit epsilon OS=Cryptococcus neoformans var. grubii serotype A (strain H99 / ATCC 208821 / CBS 10515 / FGSC 9487) OX=235443 GN=CNAG_00527 PE=4 SV=1	1	0_0_1_0_0_0_0_	0.029	0	0	10	0	0	FALSE	FALSE	FALSE
P	J9VQC2	4	0	6	0	5	0	0	0.0015898	0	0.00131584	0	0	0	0	0.0185914	0	0.0764652	0	0	0	0	5	0	5	0	0	0	0	0.008	0	0.032	0	0	0	0	DNA topoisomerase 2 OS=Cryptococcus neoformans var. grubii serotype A (strain H99 / ATCC 208821 / CBS 10515 / FGSC 9487) OX=235443 GN=CNAG_00377 PE=3 SV=2	2	1_0_1_0_0_0_0_	0.02	0	0	10	0	0	FALSE	FALSE	FALSE
P	J9W1Z3	3	0	4	0	0	0	0	0.000171403	0	0.000283733	0	0	0	0	0.25603	0	0	0	0	0	0	10	0	0	0	0	0	0	0.099	0	0	0	0	0	0	Uncharacterized protein OS=Cryptococcus neoformans var. grubii serotype A (strain H99 / ATCC 208821 / CBS 10515 / FGSC 9487) OX=235443 GN=CNAG_03918 PE=4 SV=2	1	1_0_0_0_0_0_0_	0.0495	0	0	10	0	0	FALSE	FALSE	FALSE
P	J9VPZ8	4	3	4	0	11	3	2	0.00387058	0.016036	0.00329512	0	0	0	0	0.199499	0	0.0592537	0	0	0	0	8	0	2	0	0	0	0	0.079	0	0.025	0	0	0	0	Leucine repeat containing protein OS=Cryptococcus neoformans var. grubii serotype A (strain H99 / ATCC 208821 / CBS 10515 / FGSC 9487) OX=235443 GN=CNAG_02721 PE=4 SV=2	2	1_0_1_0_0_0_0_	0.052	0	0	10	0	0	FALSE	FALSE	FALSE
P	J9VQ82	3	0	8	0	2	0	0	0.000748434	0	0.00172564	0	0	0	0	0	0	0.0939563	0	0	0	0	0	0	10	0	0	0	0	0	0	0.039	0	0	0	0	ATP-dependent RNA helicase prh1 OS=Cryptococcus neoformans var. grubii serotype A (strain H99 / ATCC 208821 / CBS 10515 / FGSC 9487) OX=235443 GN=CNAG_07381 PE=4 SV=2	1	0_0_1_0_0_0_0_	0.0195	0	0	10	0	0	FALSE	FALSE	FALSE
P	J9W1R2	11	0	22	0	3	2	0	0.00220805	0	0.00175445	0	0	0	0	0.156112	0	0.0715193	0	0	0	0	3	0	7	0	0	0	0	0.063	0	0.03	0	0	0	0	Uncharacterized protein OS=Cryptococcus neoformans var. grubii serotype A (strain H99 / ATCC 208821 / CBS 10515 / FGSC 9487) OX=235443 GN=CNAG_05699 PE=4 SV=2	2	1_0_1_0_0_0_0_	0.0465	0	0	10	0	0	FALSE	FALSE	FALSE
P	J9W1S8	6	0	4	0	0	0	0	0.000398168	0	0.000130373	0	0	0	0	0.224616	0	0.188502	0	0	0	0	3	0	7	0	0	0	0	0.088	0	0.075	0	0	0	0	ATP-dependent DNA helicase PIF1 OS=Cryptococcus neoformans var. grubii serotype A (strain H99 / ATCC 208821 / CBS 10515 / FGSC 9487) OX=235443 GN=PIF1 PE=3 SV=1	2	1_0_1_0_0_0_0_	0.0815	0	0	10	0	0	FALSE	FALSE	FALSE
P	J9VPU9	0	0	3	0	0	0	0	0	0	0.000140043	0	0	0	0	0.0914403	0	0.180321	0	0	0	0	7	0	3	0	0	0	0	0.038	0	0.072	0	0	0	0	Heat shock 70kDa protein 4 OS=Cryptococcus neoformans var. grubii serotype A (strain H99 / ATCC 208821 / CBS 10515 / FGSC 9487) OX=235443 GN=CNAG_06208 PE=3 SV=1	2	1_0_1_0_0_0_0_	0.055	0	0	10	0	0	FALSE	FALSE	FALSE
P	J9VQP6	0	0	0	0	2	0	0	0	0	0	0	0	0	0	0.0964782	0	0	0	0	0	0	10	0	0	0	0	0	0	0.04	0	0	0	0	0	0	Rho guanyl-nucleotide exchange factor OS=Cryptococcus neoformans var. grubii serotype A (strain H99 / ATCC 208821 / CBS 10515 / FGSC 9487) OX=235443 GN=CNAG_04119 PE=4 SV=2	1	1_0_0_0_0_0_0_	0.02	0	0	10	0	0	FALSE	FALSE	FALSE
P	J9VR38	2	0	4	0	2	2	0	0.000417777	0	0.000691568	0	0	0	0	0	0	0.127197	0	0	0	0	0	0	10	0	0	0	0	0	0	0.052	0	0	0	0	Chorismate synthase OS=Cryptococcus neoformans var. grubii serotype A (strain H99 / ATCC 208821 / CBS 10515 / FGSC 9487) OX=235443 GN=CNAG_05623 PE=3 SV=1	1	0_0_1_0_0_0_0_	0.026	0	0	10	0	0	FALSE	FALSE	FALSE
P	J9VQJ2	0	0	3	0	0	0	0	0	0	0.000271927	0	0.00200369	0.00218772	0	0.210598	0	0.455459	0	0.44544	1.23357	0	5	0	4	0	12	16	0	0.083	0	0.163	0	0.16	0.349	0	60S acidic ribosomal protein P0 OS=Cryptococcus neoformans var. grubii serotype A (strain H99 / ATCC 208821 / CBS 10515 / FGSC 9487) OX=235443 GN=CNAG_03577 PE=3 SV=1	4	1_0_1_0_1_1_0_	0.123	0.2545	0	9	28	0	FALSE	TRUE	FALSE	CNAG_03577
P	J9VQS2	0	0	0	0	0	0	2	0	0	0	0	0.000316373	0.000345429	0.000592075	0	0	0.185769	0	0.0864257	0.0789467	0.0568175	0	0	9	0	6	8	2	0	0	0.074	0	0.036	0.033	0.024	U3 small nucleolar RNA-associated protein 12 OS=Cryptococcus neoformans var. grubii serotype A (strain H99 / ATCC 208821 / CBS 10515 / FGSC 9487) OX=235443 GN=CNAG_05101 PE=4 SV=2	4	0_0_1_0_1_1_1_	0.037	0.0345	0.024	9	14	2	FALSE	FALSE	FALSE
P	J9VR37	2	0	0	0	0	2	0	0.00023669	0	0	0	0	0.000122941	0	0.119438	0	0.0964782	0	0	0.0375284	0	6	0	3	0	0	2	0	0.049	0	0.04	0	0	0.016	0	Catalase OS=Cryptococcus neoformans var. grubii serotype A (strain H99 / ATCC 208821 / CBS 10515 / FGSC 9487) OX=235443 GN=CNAG_00575 PE=3 SV=1	3	1_0_1_0_0_1_0_	0.0445	0.008	0	9	2	0	FALSE	FALSE	FALSE
P	J9VQN2	9	0	6	0	0	0	0	0.000669908	0	0.000538625	0	0.00031478	0	0	0.199499	0	0	0	0.0789467	0	0	9	0	0	0	2	0	0	0.079	0	0	0	0.033	0	0	CK1/CK1/CK1-D protein kinase OS=Cryptococcus neoformans var. grubii serotype A (strain H99 / ATCC 208821 / CBS 10515 / FGSC 9487) OX=235443 GN=CNAG_07427 PE=3 SV=1	2	1_0_0_0_1_0_0_	0.0395	0.0165	0	9	2	0	FALSE	FALSE	FALSE
P	J9VQK8	0	2	0	0	2	0	0	0	0.00245596	0	0	0	7.84921e-05	0	0	0	0.169499	0	0	0.0209395	0	0	0	9	0	0	2	0	0	0	0.068	0	0	0.009	0	Phospholipid binding protein OS=Cryptococcus neoformans var. grubii serotype A (strain H99 / ATCC 208821 / CBS 10515 / FGSC 9487) OX=235443 GN=CNAG_03319 PE=4 SV=2	2	0_0_1_0_0_1_0_	0.034	0.0045	0	9	2	0	FALSE	FALSE	FALSE
P	J9VR32	37	0	46	0	20	5	11	0.00993285	0	0.015699	0	0	0	0	0.0616956	0	0.0471286	0	0	0	0	7	0	2	0	0	0	0	0.026	0	0.02	0	0	0	0	Protein-tyrosine-phosphatase OS=Cryptococcus neoformans var. grubii serotype A (strain H99 / ATCC 208821 / CBS 10515 / FGSC 9487) OX=235443 GN=PTP2 PE=2 SV=1	2	1_0_1_0_0_0_0_	0.023	0	0	9	0	0	FALSE	FALSE	FALSE
P	J9VR33	19	0	20	4	30	17	2	0.01316	0	0.00681288	0.00572891	0	0	0	0.21899	0	0	0	0	0	0	9	0	0	0	0	0	0	0.086	0	0	0	0	0	0	T-complex protein 1 subunit epsilon OS=Cryptococcus neoformans var. grubii serotype A (strain H99 / ATCC 208821 / CBS 10515 / FGSC 9487) OX=235443 GN=CNAG_00058 PE=3 SV=1	1	1_0_0_0_0_0_0_	0.043	0	0	9	0	0	FALSE	FALSE	FALSE
P	J9VR49	13	0	8	0	2	6	0	0.00195445	0	0.000776473	0	0	0	0	0.111732	0	0.0519619	0	0	0	0	6	0	3	0	0	0	0	0.046	0	0.022	0	0	0	0	Dynamin GTPase OS=Cryptococcus neoformans var. grubii serotype A (strain H99 / ATCC 208821 / CBS 10515 / FGSC 9487) OX=235443 GN=CNAG_00565 PE=3 SV=1	2	1_0_1_0_0_0_0_	0.034	0	0	9	0	0	FALSE	FALSE	FALSE
P	J9VQS9	0	0	2	0	0	0	0	0	0	0.000169492	0	0	0	0	0.230269	0	0.1508	0	0	0	0	2	0	7	0	0	0	0	0.09	0	0.061	0	0	0	0	RNA polymerase II subunit A domain phosphatase SSU72 OS=Cryptococcus neoformans var. grubii serotype A (strain H99 / ATCC 208821 / CBS 10515 / FGSC 9487) OX=235443 GN=CNAG_01054 PE=4 SV=2	2	1_0_1_0_0_0_0_	0.0755	0	0	9	0	0	FALSE	FALSE	FALSE
P	J9VQI1	13	0	22	0	17	22	0	0.00559008	0	0.00347008	0	0	0	0	0.122018	0	0.116863	0	0	0	0	3	0	6	0	0	0	0	0.05	0	0.048	0	0	0	0	U3 small nucleolar RNA-associated protein 3 OS=Cryptococcus neoformans var. grubii serotype A (strain H99 / ATCC 208821 / CBS 10515 / FGSC 9487) OX=235443 GN=CNAG_06367 PE=4 SV=1	2	1_0_1_0_0_0_0_	0.049	0	0	9	0	0	FALSE	FALSE	FALSE
P	J9VQI0	5	0	13	0	38	17	2	0.00421119	0	0.00522825	0	0	0	0	0	0	0.0592537	0	0	0	0	0	0	9	0	0	0	0	0	0	0.025	0	0	0	0	Spermidine synthase OS=Cryptococcus neoformans var. grubii serotype A (strain H99 / ATCC 208821 / CBS 10515 / FGSC 9487) OX=235443 GN=CNAG_03476 PE=3 SV=1	1	0_0_1_0_0_0_0_	0.0125	0	0	9	0	0	FALSE	FALSE	FALSE
P	J9W2J0	59	3	59	2	6	16	4	0.0158778	0.0017779	0.00505371	0.000552964	0	0	0	0.0641431	0	0.116863	0	0	0	0	4	0	5	0	0	0	0	0.027	0	0.048	0	0	0	0	Uncharacterized protein OS=Cryptococcus neoformans var. grubii serotype A (strain H99 / ATCC 208821 / CBS 10515 / FGSC 9487) OX=235443 GN=CNAG_04434 PE=4 SV=2	2	1_0_1_0_0_0_0_	0.0375	0	0	9	0	0	FALSE	FALSE	FALSE
P	J9VQJ5	11	0	22	0	6	5	0	0.00124192	0	0.00199398	0	0	0	0	0	0	0.101539	0	0	0	0	0	0	9	0	0	0	0	0	0	0.042	0	0	0	0	Sulfite reductase (NADPH) flavoprotein alpha-component OS=Cryptococcus neoformans var. grubii serotype A (strain H99 / ATCC 208821 / CBS 10515 / FGSC 9487) OX=235443 GN=CNAG_03168 PE=4 SV=1	1	0_0_1_0_0_0_0_	0.021	0	0	9	0	0	FALSE	FALSE	FALSE
P	J9VQZ9	22	0	128	0	7	4	5	0.00108523	0	0.00655744	0	0.000442743	0.000362554	0	0.233105	0	0.0592537	0	0.207814	0.0592537	0	6	0	2	0	3	3	0	0.091	0	0.025	0	0.082	0.025	0	Ribosomal RNA-processing protein 1 OS=Cryptococcus neoformans var. grubii serotype A (strain H99 / ATCC 208821 / CBS 10515 / FGSC 9487) OX=235443 GN=CNAG_03300 PE=4 SV=1	4	1_0_1_0_1_1_0_	0.058	0.0535	0	8	6	0	FALSE	FALSE	FALSE
P	J9W2T0	0	0	0	0	0	2	0	0	0	0	0	0.000146064	0	0	0	0	0.0543869	0	0.0568175	0	0	0	0	8	0	3	0	0	0	0	0.023	0	0.024	0	0	RNA cytidine acetyltransferase OS=Cryptococcus neoformans var. grubii serotype A (strain H99 / ATCC 208821 / CBS 10515 / FGSC 9487) OX=235443 GN=NAT10 PE=3 SV=1	2	0_0_1_0_1_0_0_	0.0115	0.012	0	8	3	0	FALSE	FALSE	FALSE
P	J9VQF1	2	0	2	0	2	0	0	0.000862007	0	0.000611539	0	0.000151442	0	0	0	0	0.158777	0	0.0690548	0	0	0	0	8	0	2	0	0	0	0	0.064	0	0.029	0	0	Pumilio domain-containing protein OS=Cryptococcus neoformans var. grubii serotype A (strain H99 / ATCC 208821 / CBS 10515 / FGSC 9487) OX=235443 GN=CNAG_03675 PE=4 SV=1	2	0_0_1_0_1_0_0_	0.032	0.0145	0	8	2	0	FALSE	FALSE	FALSE
P	J9VRA8	110	0	169	0	41	36	0	0.0141684	0	0.0102662	0	0.000124781	0	0	0.177606	0	0.0715193	0	0.0715193	0	0	4	0	4	0	2	0	0	0.071	0	0.03	0	0.03	0	0	Uncharacterized protein OS=Cryptococcus neoformans var. grubii serotype A (strain H99 / ATCC 208821 / CBS 10515 / FGSC 9487) OX=235443 GN=CNAG_02071 PE=4 SV=1	3	1_0_1_0_1_0_0_	0.0505	0.015	0	8	2	0	FALSE	FALSE	FALSE
P	J9VQK9	2	0	4	0	0	0	0	0.000192585	0	0.000409881	0	0	0	0	0	0	0.116863	0	0	0	0	0	0	8	0	0	0	0	0	0	0.048	0	0	0	0	Obg-like ATPase 1 OS=Cryptococcus neoformans var. grubii serotype A (strain H99 / ATCC 208821 / CBS 10515 / FGSC 9487) OX=235443 GN=CNAG_02880 PE=3 SV=1	1	0_0_1_0_0_0_0_	0.024	0	0	8	0	0	FALSE	FALSE	FALSE
P	J9W2G5	10	0	30	0	37	32	0	0.0038517	0	0.00929063	0	0	0	0	0	0	0.406048	0	0	0	0	0	0	8	0	0	0	0	0	0	0.148	0	0	0	0	Eukaryotic translation initiation factor 3 subunit G OS=Cryptococcus neoformans var. grubii serotype A (strain H99 / ATCC 208821 / CBS 10515 / FGSC 9487) OX=235443 GN=TIF35 PE=3 SV=1	1	0_0_1_0_0_0_0_	0.074	0	0	8	0	0	FALSE	FALSE	FALSE
P	J9VRC0	0	0	0	0	0	0	3	0	0	0	0	0	0	0	0	0	0.235947	0	0	0	0	0	0	8	0	0	0	0	0	0	0.092	0	0	0	0	Sulfite reductase (NADPH) hemoprotein, beta-component OS=Cryptococcus neoformans var. grubii serotype A (strain H99 / ATCC 208821 / CBS 10515 / FGSC 9487) OX=235443 GN=CNAG_05070 PE=3 SV=2	1	0_0_1_0_0_0_0_	0.046	0	0	8	0	0	FALSE	FALSE	FALSE
P	J9W3D8	24	0	55	0	53	33	0	0.0031418	0	0.00601384	0	0	0	0	0.196741	0	0.216186	0	0	0	0	2	0	6	0	0	0	0	0.078	0	0.085	0	0	0	0	UDP-glucuronate decarboxylase OS=Cryptococcus neoformans var. grubii serotype A (strain H99 / ATCC 208821 / CBS 10515 / FGSC 9487) OX=235443 GN=CNAG_03322 PE=4 SV=1	2	1_0_1_0_0_0_0_	0.0815	0	0	8	0	0	FALSE	FALSE	FALSE
P	J9VQX1	9	0	10	0	0	2	2	0.000614952	0	0.000327202	0	0	0	0	0.0889301	0	0.1324	0	0	0	0	5	0	3	0	0	0	0	0.037	0	0.054	0	0	0	0	Argininosuccinate synthase OS=Cryptococcus neoformans var. grubii serotype A (strain H99 / ATCC 208821 / CBS 10515 / FGSC 9487) OX=235443 GN=CNAG_00930 PE=3 SV=1	2	1_0_1_0_0_0_0_	0.0455	0	0	8	0	0	FALSE	FALSE	FALSE
P	J9W350	2	0	3	0	0	0	0	0.000161362	0	0.000228952	0	0	0	0	0.0568175	0	0.0568175	0	0	0	0	6	0	2	0	0	0	0	0.024	0	0.024	0	0	0	0	UDP-galactopyranose mutase OS=Cryptococcus neoformans var. grubii serotype A (strain H99 / ATCC 208821 / CBS 10515 / FGSC 9487) OX=235443 GN=CNAG_07752 PE=4 SV=1	2	1_0_1_0_0_0_0_	0.024	0	0	8	0	0	FALSE	FALSE	FALSE
P	J9W2T4	2	0	3	0	0	0	0	0.000357515	0	0.000108701	0	0	0	0	0.0519619	0	0.0115795	0	0	0	0	5	0	3	0	0	0	0	0.022	0	0.005	0	0	0	0	Uncharacterized protein OS=Cryptococcus neoformans var. grubii serotype A (strain H99 / ATCC 208821 / CBS 10515 / FGSC 9487) OX=235443 GN=CNAG_05343 PE=4 SV=2	2	1_0_1_0_0_0_0_	0.0135	0	0	8	0	0	FALSE	FALSE	FALSE
P	J9VR52	3	0	5	0	0	0	0	0.000113015	0	0.000213805	0	0	0	0	0.119438	0	0.0519619	0	0	0	0	5	0	3	0	0	0	0	0.049	0	0.022	0	0	0	0	Uncharacterized protein OS=Cryptococcus neoformans var. grubii serotype A (strain H99 / ATCC 208821 / CBS 10515 / FGSC 9487) OX=235443 GN=CNAG_05565 PE=4 SV=1	2	1_0_1_0_0_0_0_	0.0355	0	0	8	0	0	FALSE	FALSE	FALSE
P	J9VR59	4	0	5	0	0	0	0	0.000347331	0	0.000205341	0	0	0.00134012	0	0	0	1.11349	0	0	0.419058	0	0	0	7	0	0	6	0	0	0	0.325	0	0	0.152	0	Large subunit ribosomal protein L9e OS=Cryptococcus neoformans var. grubii serotype A (strain H99 / ATCC 208821 / CBS 10515 / FGSC 9487) OX=235443 GN=CNAG_00034 PE=4 SV=1	2	0_0_1_0_0_1_0_	0.1625	0.076	0	7	6	0	FALSE	FALSE	FALSE
P	J9VRJ9	0	0	3	0	0	0	0	0	0	0.000194955	0	0	0.00167955	0	0	0	1.18273	0	0	1.18273	0	0	0	7	0	0	5	0	0	0	0.339	0	0	0.339	0	Ribonucleoprotein-associated protein OS=Cryptococcus neoformans var. grubii serotype A (strain H99 / ATCC 208821 / CBS 10515 / FGSC 9487) OX=235443 GN=CNAG_03435 PE=4 SV=1	2	0_0_1_0_0_1_0_	0.1695	0.1695	0	7	5	0	FALSE	FALSE	FALSE
P	J9VRQ9	0	0	0	0	0	0	4	0	0	0	0	0.000205103	0.000167955	0	0.145513	0.406048	0.324342	0.0939563	0.119438	0.0375284	0	3	8	4	5	2	2	0	0.059	0.148	0.122	0.039	0.049	0.016	0	Pre-mRNA-processing factor 19 OS=Cryptococcus neoformans var. grubii serotype A (strain H99 / ATCC 208821 / CBS 10515 / FGSC 9487) OX=235443 GN=CNAG_01733 PE=4 SV=1	6	1_1_1_1_1_1_0_	0.0905	0.0325	0	7	4	0	FALSE	FALSE	FALSE
P	J9VRL6	9	0	0	0	0	0	0	0.000557483	0	0	0	0.00013358	0	0	0.109175	0	0.081434	0	0.0423174	0	0	4	0	3	0	3	0	0	0.045	0	0.034	0	0.018	0	0	DNA polymerase phi subunit OS=Cryptococcus neoformans var. grubii serotype A (strain H99 / ATCC 208821 / CBS 10515 / FGSC 9487) OX=235443 GN=CNAG_01641 PE=4 SV=2	3	1_0_1_0_1_0_0_	0.0395	0.009	0	7	3	0	FALSE	FALSE	FALSE
P	J9VRT2	0	0	3	0	2	2	0	0	0	0.000170784	0	0	8.95288e-05	0	0	0	0.0839269	0	0	0.0715193	0	0	0	7	0	0	2	0	0	0	0.035	0	0	0.03	0	Eukaryotic translation initiation factor 3 subunit A OS=Cryptococcus neoformans var. grubii serotype A (strain H99 / ATCC 208821 / CBS 10515 / FGSC 9487) OX=235443 GN=TIF32 PE=3 SV=1	2	0_0_1_0_0_1_0_	0.0175	0.015	0	7	2	0	FALSE	FALSE	FALSE
P	J9VRL7	2	0	2	0	0	0	0	0.000366687	0	0.000303498	0	0.000176	0	0	0.1508	0	0.0889301	0	0.111732	0	0	4	0	3	0	2	0	0	0.061	0	0.037	0	0.046	0	0	Asparagine synthase (Glutamine-hydrolyzing) OS=Cryptococcus neoformans var. grubii serotype A (strain H99 / ATCC 208821 / CBS 10515 / FGSC 9487) OX=235443 GN=CNAG_05425 PE=4 SV=1	3	1_0_1_0_1_0_0_	0.049	0.023	0	7	2	0	FALSE	FALSE	FALSE
P	J9VQT9	5	0	9	0	0	0	0	0.000160023	0	0.000194616	0	0	0	0	0	0	0.651962	0	0	0	0	0	0	7	0	0	0	0	0	0	0.218	0	0	0	0	Urease accessory protein UreG OS=Cryptococcus neoformans var. grubii serotype A (strain H99 / ATCC 208821 / CBS 10515 / FGSC 9487) OX=235443 GN=CNAG_00678 PE=3 SV=1	1	0_0_1_0_0_0_0_	0.109	0	0	7	0	0	FALSE	FALSE	FALSE
P	J9W2U5	7	0	23	0	23	15	0	0.00826324	0	0.0138957	0	0	0	0	0	0	0.0303861	0	0	0	0	0	0	7	0	0	0	0	0	0	0.013	0	0	0	0	Hsp71-like protein OS=Cryptococcus neoformans var. grubii serotype A (strain H99 / ATCC 208821 / CBS 10515 / FGSC 9487) OX=235443 GN=CNAG_01404 PE=3 SV=1	1	0_0_1_0_0_0_0_	0.0065	0	0	7	0	0	FALSE	FALSE	FALSE
P	J9VR72	29	0	17	0	13	6	402	0.00178584	0	0.000497728	0	0	0	0	0	0	0.0964782	0	0	0	0	0	0	7	0	0	0	0	0	0	0.04	0	0	0	0	Uncharacterized protein OS=Cryptococcus neoformans var. grubii serotype A (strain H99 / ATCC 208821 / CBS 10515 / FGSC 9487) OX=235443 GN=CNAG_06751 PE=4 SV=2	1	0_0_1_0_0_0_0_	0.02	0	0	7	0	0	FALSE	FALSE	FALSE
P	J9VR74	5	0	9	0	3	0	0	0.000613845	0	0.000229202	0	0	0	0	0.0889301	0	0.023293	0	0	0	0	2	0	5	0	0	0	0	0.037	0	0.01	0	0	0	0	Cystathionine beta-lyase OS=Cryptococcus neoformans var. grubii serotype A (strain H99 / ATCC 208821 / CBS 10515 / FGSC 9487) OX=235443 GN=CNAG_02686 PE=4 SV=1	2	1_0_1_0_0_0_0_	0.0235	0	0	7	0	0	FALSE	FALSE	FALSE
P	J9W435	8	0	6	0	3	2	0	0.000447999	0	0.000278099	0	0	0	0	0.0327615	0	0	0	0	0	0	7	0	0	0	0	0	0	0.014	0	0	0	0	0	0	Glycosyl hydrolase OS=Cryptococcus neoformans var. grubii serotype A (strain H99 / ATCC 208821 / CBS 10515 / FGSC 9487) OX=235443 GN=CNAG_05077 PE=4 SV=2	1	1_0_0_0_0_0_0_	0.007	0	0	7	0	0	FALSE	FALSE	FALSE
P	J9VS17	2	0	0	0	0	2	0	0.000771092	0	0	0	0	0	0	0.0665962	0	0.0471286	0	0	0	0	4	0	3	0	0	0	0	0.028	0	0.02	0	0	0	0	Translation initiation factor aIF-2 OS=Cryptococcus neoformans var. grubii serotype A (strain H99 / ATCC 208821 / CBS 10515 / FGSC 9487) OX=235443 GN=CNAG_03606 PE=4 SV=1	2	1_0_1_0_0_0_0_	0.024	0	0	7	0	0	FALSE	FALSE	FALSE
P	J9VRQ2	0	0	2	0	0	0	0	0	0	0.000443406	0	0	0	0	0.0592537	0	0.0375284	0	0	0	0	3	0	4	0	0	0	0	0.025	0	0.016	0	0	0	0	DNA-directed RNA polymerase subunit OS=Cryptococcus neoformans var. grubii serotype A (strain H99 / ATCC 208821 / CBS 10515 / FGSC 9487) OX=235443 GN=CNAG_02166 PE=3 SV=1	2	1_0_1_0_0_0_0_	0.0205	0	0	7	0	0	FALSE	FALSE	FALSE
P	J9VRJ5	5	0	12	0	0	0	0	0.000506153	0	0.000807937	0	0	0	0	0.119438	0	0.104079	0	0	0	0	5	0	2	0	0	0	0	0.049	0	0.043	0	0	0	0	NAD-specific glutamate dehydrogenase OS=Cryptococcus neoformans var. grubii serotype A (strain H99 / ATCC 208821 / CBS 10515 / FGSC 9487) OX=235443 GN=CNAG_00879 PE=3 SV=1	2	1_0_1_0_0_0_0_	0.046	0	0	7	0	0	FALSE	FALSE	FALSE
P	J9VRL4	2	0	3	0	0	0	0	0.000162024	0	0.000114946	0	0	0	0	0	0	0.177606	0	0	0	0	0	0	7	0	0	0	0	0	0	0.071	0	0	0	0	ATP-binding cassette, subfamily F, member 3 OS=Cryptococcus neoformans var. grubii serotype A (strain H99 / ATCC 208821 / CBS 10515 / FGSC 9487) OX=235443 GN=CNAG_04613 PE=4 SV=1	1	0_0_1_0_0_0_0_	0.0355	0	0	7	0	0	FALSE	FALSE	FALSE
P	J9VRG6	0	0	0	0	2	2	2	0	0	0	0	0	0.000144449	0	0	0	0.127197	0	0	0.0351422	0	0	0	6	0	0	3	0	0	0	0.052	0	0	0.015	0	Eukaryotic translation initiation factor 3 subunit C OS=Cryptococcus neoformans var. grubii serotype A (strain H99 / ATCC 208821 / CBS 10515 / FGSC 9487) OX=235443 GN=NIP1 PE=3 SV=1	2	0_0_1_0_0_1_0_	0.026	0.0075	0	6	3	0	FALSE	FALSE	FALSE
P	J9VRH1	7	0	8	0	0	0	0	0.0011646	0	0.00148718	0	0.000716918	0	0	0.196741	0.288249	0.342765	0	0.288249	0	0	4	4	2	0	3	0	0	0.078	0.11	0.128	0	0.11	0	0	Pre-mRNA-splicing factor SPF27 OS=Cryptococcus neoformans var. grubii serotype A (strain H99 / ATCC 208821 / CBS 10515 / FGSC 9487) OX=235443 GN=CNAG_05689 PE=4 SV=1	4	1_1_1_0_1_0_0_	0.103	0.055	0	6	3	0	FALSE	FALSE	FALSE
P	J9VSC4	9	5	20	3	25	19	2	0.00567524	0.0102229	0.0106782	0.00635909	3.26723e-05	0	0	0.0447202	0	0.0185914	0	0.0185914	0	0	4	0	2	0	2	0	0	0.019	0	0.008	0	0.008	0	0	Vacuolar protein sorting-associated protein OS=Cryptococcus neoformans var. grubii serotype A (strain H99 / ATCC 208821 / CBS 10515 / FGSC 9487) OX=235443 GN=CNAG_01722 PE=3 SV=2	3	1_0_1_0_1_0_0_	0.0135	0.004	0	6	2	0	FALSE	FALSE	FALSE
P	J9VRM8	0	0	0	0	0	0	4	0	0	0	0	0	0	0	0	0	0.321296	0	0	0	0	0	0	6	0	0	0	0	0	0	0.121	0	0	0	0	RNA helicase OS=Cryptococcus neoformans var. grubii serotype A (strain H99 / ATCC 208821 / CBS 10515 / FGSC 9487) OX=235443 GN=CNAG_03603 PE=3 SV=1	1	0_0_1_0_0_0_0_	0.0605	0	0	6	0	0	FALSE	FALSE	FALSE
P	J9VRF3	3	0	2	0	2	0	0	0.00111459	0	0.000124852	0	0	0	0	0.0990058	0	0.0327615	0	0	0	0	4	0	2	0	0	0	0	0.041	0	0.014	0	0	0	0	Pumilio domain-containing protein c OS=Cryptococcus neoformans var. grubii serotype A (strain H99 / ATCC 208821 / CBS 10515 / FGSC 9487) OX=235443 GN=CNAG_01360 PE=4 SV=1	2	1_0_1_0_0_0_0_	0.0275	0	0	6	0	0	FALSE	FALSE	FALSE
P	J9VRF4	3	0	3	0	0	0	0	0.000460139	0	0.000195864	0	0	0	0	0	0	0.210598	0	0	0	0	0	0	6	0	0	0	0	0	0	0.083	0	0	0	0	Aspartate-tRNA(Asn) ligase OS=Cryptococcus neoformans var. grubii serotype A (strain H99 / ATCC 208821 / CBS 10515 / FGSC 9487) OX=235443 GN=CNAG_07400 PE=3 SV=1	1	0_0_1_0_0_0_0_	0.0415	0	0	6	0	0	FALSE	FALSE	FALSE
P	J9VSC8	29	6	42	6	45	45	8	0.0170944	0.0098365	0.0200679	0.0131115	0	0	0	0	0	0.0471286	0	0	0	0	0	0	6	0	0	0	0	0	0	0.02	0	0	0	0	26S proteasome regulatory subunit RPN1 OS=Cryptococcus neoformans var. grubii serotype A (strain H99 / ATCC 208821 / CBS 10515 / FGSC 9487) OX=235443 GN=CNAG_07863 PE=3 SV=2	1	0_0_1_0_0_0_0_	0.01	0	0	6	0	0	FALSE	FALSE	FALSE
P	J9VSE6	2	0	7	0	4	3	0	0.000181935	0	0.000387214	0	0	0	0	0.142878	0	0	0	0	0	0	6	0	0	0	0	0	0	0.058	0	0	0	0	0	0	Uncharacterized protein OS=Cryptococcus neoformans var. grubii serotype A (strain H99 / ATCC 208821 / CBS 10515 / FGSC 9487) OX=235443 GN=CNAG_07415 PE=4 SV=1	1	1_0_0_0_0_0_0_	0.029	0	0	6	0	0	FALSE	FALSE	FALSE
P	J9VS82	5	0	10	0	10	5	0	0.00165073	0	0.00156145	0	0	0	0	0.111732	0	0	0	0	0	0	6	0	0	0	0	0	0	0.046	0	0	0	0	0	0	AGC/RSK protein kinase, variant OS=Cryptococcus neoformans var. grubii serotype A (strain H99 / ATCC 208821 / CBS 10515 / FGSC 9487) OX=235443 GN=CNAG_04040 PE=4 SV=1	1	1_0_0_0_0_0_0_	0.023	0	0	6	0	0	FALSE	FALSE	FALSE
P	J9W3X8	6	0	13	0	2	0	0	0.00150879	0	0.00214078	0	0	0	0	0	0	0.122018	0	0	0	0	0	0	6	0	0	0	0	0	0	0.05	0	0	0	0	RNA-binding domain-containing protein, X-linked 2 OS=Cryptococcus neoformans var. grubii serotype A (strain H99 / ATCC 208821 / CBS 10515 / FGSC 9487) OX=235443 GN=CNAG_04181 PE=4 SV=2	1	0_0_1_0_0_0_0_	0.025	0	0	6	0	0	FALSE	FALSE	FALSE
P	J9VRY2	19	0	29	0	4	3	6	0.00150587	0	0.00150958	0	0	0	0	0.0715193	0	0.0864257	0	0	0	0	3	0	3	0	0	0	0	0.03	0	0.036	0	0	0	0	NEK protein kinase OS=Cryptococcus neoformans var. grubii serotype A (strain H99 / ATCC 208821 / CBS 10515 / FGSC 9487) OX=235443 GN=CNAG_04148 PE=4 SV=1	2	1_0_1_0_0_0_0_	0.033	0	0	6	0	0	FALSE	FALSE	FALSE
P	J9VST2	0	0	3	0	2	0	0	0	0	0.0123972	0	0	0	0	0.294196	0	0	0	0	0	0	6	0	0	0	0	0	0	0.112	0	0	0	0	0	0	Uncharacterized protein OS=Cryptococcus neoformans var. grubii serotype A (strain H99 / ATCC 208821 / CBS 10515 / FGSC 9487) OX=235443 GN=CNAG_01492 PE=4 SV=1	1	1_0_0_0_0_0_0_	0.056	0	0	6	0	0	FALSE	FALSE	FALSE
P	J9VST0	0	0	3	0	0	0	0	0	0	0.000277312	0	0	0	0	0.202264	0	0	0	0	0	0	6	0	0	0	0	0	0	0.08	0	0	0	0	0	0	ATP-dependent RNA helicase DBP3 OS=Cryptococcus neoformans var. grubii serotype A (strain H99 / ATCC 208821 / CBS 10515 / FGSC 9487) OX=235443 GN=CNAG_02502 PE=3 SV=1	1	1_0_0_0_0_0_0_	0.04	0	0	6	0	0	FALSE	FALSE	FALSE
P	J9VT09	8	0	13	0	8	6	0	0.00241714	0	0.00194345	0	0	0.00601255	0	0	1.6485	0.663413	0.148154	0	1.95121	0	0	11	5	6	0	21	0	0	0.423	0.221	0.06	0	0.47	0	Calmodulin OS=Cryptococcus neoformans var. grubii serotype A (strain H99 / ATCC 208821 / CBS 10515 / FGSC 9487) OX=235443 GN=CNAG_01557 PE=4 SV=2	4	0_1_1_1_0_1_0_	0.1105	0.235	0	5	21	0	FALSE	FALSE	FALSE
P	J9VT66	0	0	4	0	0	0	0	0	0	0.000972517	0	0.000580457	0.000356494	0	0.479108	0	0	0	0.318257	0.367729	0	5	0	0	0	4	3	0	0.17	0	0	0	0.12	0.136	0	Fructose-bisphosphate aldolase 1 OS=Cryptococcus neoformans var. grubii serotype A (strain H99 / ATCC 208821 / CBS 10515 / FGSC 9487) OX=235443 GN=CNAG_06770 PE=4 SV=1	3	1_0_0_0_1_1_0_	0.085	0.128	0	5	7	0	FALSE	TRUE	FALSE	CNAG_06770
P	J9VSQ4	2	0	3	0	0	0	0	6.63156e-05	0	6.2729e-05	0	0.00122291	0	0	0	0	0.352073	0	0.506607	0	0	0	0	5	0	5	0	0	0	0	0.131	0	0.178	0	0	Nucleolar protein 16 OS=Cryptococcus neoformans var. grubii serotype A (strain H99 / ATCC 208821 / CBS 10515 / FGSC 9487) OX=235443 GN=CNAG_03064 PE=4 SV=1	2	0_0_1_0_1_0_0_	0.0655	0.089	0	5	5	0	FALSE	FALSE	FALSE
P	J9VSI7	0	6	11	4	7	2	0	0	0.0217299	0.00365328	0.0276482	0	0.000512438	0	0.34586	0	0	0	0	0.355189	0	5	0	0	0	0	4	0	0.129	0	0	0	0	0.132	0	Alcohol dehydrogenase (NADP ) OS=Cryptococcus neoformans var. grubii serotype A (strain H99 / ATCC 208821 / CBS 10515 / FGSC 9487) OX=235443 GN=CNAG_01896 PE=4 SV=1	2	1_0_0_0_0_1_0_	0.0645	0.066	0	5	4	0	FALSE	FALSE	FALSE
P	J9VSJ2	18	0	29	0	29	27	2	0.00688799	0	0.00762785	0	0.000507429	0	0	0	0	0.452112	0	0.339677	0	0	0	0	5	0	3	0	0	0	0	0.162	0	0.127	0	0	Large subunit ribosomal protein L3 OS=Cryptococcus neoformans var. grubii serotype A (strain H99 / ATCC 208821 / CBS 10515 / FGSC 9487) OX=235443 GN=CNAG_07637 PE=3 SV=1	2	0_0_1_0_1_0_0_	0.081	0.0635	0	5	3	0	FALSE	FALSE	FALSE
P	J9VSL1	33	4	37	12	26	49	2	0.020166	0.00980617	0.009672	0.0274493	0	0.000102303	0	0.0543869	0	0	0	0	0.0327615	0	5	0	0	0	0	2	0	0.023	0	0	0	0	0.014	0	Phosphoketolase OS=Cryptococcus neoformans var. grubii serotype A (strain H99 / ATCC 208821 / CBS 10515 / FGSC 9487) OX=235443 GN=CNAG_06923 PE=3 SV=1	2	1_0_0_0_0_1_0_	0.0115	0.007	0	5	2	0	FALSE	FALSE	FALSE
P	J9VSN6	0	0	3	0	2	0	0	0	0	0.000191839	0	0	0.000333285	0	0.285287	0	0	0	0	0.358313	0	5	0	0	0	0	2	0	0.109	0	0	0	0	0.133	0	Protein BMH2 OS=Cryptococcus neoformans var. grubii serotype A (strain H99 / ATCC 208821 / CBS 10515 / FGSC 9487) OX=235443 GN=CNAG_05235 PE=3 SV=1	2	1_0_0_0_0_1_0_	0.0545	0.0665	0	5	2	0	FALSE	FALSE	FALSE
P	J9VSU2	10	4	12	2	13	2	0	0.0085664	0.0231463	0.0208743	0.0083988	0	0	0	0	0	0.0665962	0	0	0	0	0	0	5	0	0	0	0	0	0	0.028	0	0	0	0	Structural maintenance of chromosomes protein OS=Cryptococcus neoformans var. grubii serotype A (strain H99 / ATCC 208821 / CBS 10515 / FGSC 9487) OX=235443 GN=CNAG_03767 PE=3 SV=2	1	0_0_1_0_0_0_0_	0.014	0	0	5	0	0	FALSE	FALSE	FALSE
P	J9VSU6	0	0	0	0	0	0	4	0	0	0	0	0	0	0	0.0495424	0	0.0495424	0	0	0	0	2	0	3	0	0	0	0	0.021	0	0.021	0	0	0	0	Translation initiation factor 2D OS=Cryptococcus neoformans var. grubii serotype A (strain H99 / ATCC 208821 / CBS 10515 / FGSC 9487) OX=235443 GN=CNAG_05082 PE=4 SV=2	2	1_0_1_0_0_0_0_	0.021	0	0	5	0	0	FALSE	FALSE	FALSE
P	J9VSV4	2	0	0	0	0	0	0	0.000235	0	0	0	0	0	0	0	0	0.0641431	0	0	0	0	0	0	5	0	0	0	0	0	0	0.027	0	0	0	0	Threonine dehydratase OS=Cryptococcus neoformans var. grubii serotype A (strain H99 / ATCC 208821 / CBS 10515 / FGSC 9487) OX=235443 GN=CNAG_07529 PE=3 SV=1	1	0_0_1_0_0_0_0_	0.0135	0	0	5	0	0	FALSE	FALSE	FALSE
P	J9VSV5	0	0	0	0	0	0	2	0	0	0	0	0	0	0	0	0	0.1508	0	0	0	0	0	0	5	0	0	0	0	0	0	0.061	0	0	0	0	DNA-directed RNA polymerase III subunit RPC5 OS=Cryptococcus neoformans var. grubii serotype A (strain H99 / ATCC 208821 / CBS 10515 / FGSC 9487) OX=235443 GN=CNAG_07374 PE=4 SV=2	1	0_0_1_0_0_0_0_	0.0305	0	0	5	0	0	FALSE	FALSE	FALSE
P	J9VT86	5	0	16	0	16	5	0	0.00101231	0	0.0021545	0	0	0	0	0	0	0.0739894	0	0	0	0	0	0	5	0	0	0	0	0	0	0.031	0	0	0	0	Uncharacterized protein OS=Cryptococcus neoformans var. grubii serotype A (strain H99 / ATCC 208821 / CBS 10515 / FGSC 9487) OX=235443 GN=CNAG_00387 PE=4 SV=2	1	0_0_1_0_0_0_0_	0.0155	0	0	5	0	0	FALSE	FALSE	FALSE
P	J9VSW4	5	0	8	0	0	0	0	0.000226896	0	0.000515099	0	0	0	0	0	0	0.0209395	0	0	0	0	0	0	5	0	0	0	0	0	0	0.009	0	0	0	0	Histone demethylase JARID1 OS=Cryptococcus neoformans var. grubii serotype A (strain H99 / ATCC 208821 / CBS 10515 / FGSC 9487) OX=235443 GN=CNAG_07411 PE=4 SV=1	1	0_0_1_0_0_0_0_	0.0045	0	0	5	0	0	FALSE	FALSE	FALSE
P	J9VT14	0	0	2	0	0	0	0	0	0	0.000163156	0	0	0	0	0	0	0.111732	0	0	0	0	0	0	5	0	0	0	0	0	0	0.046	0	0	0	0	Sorting nexin-41 OS=Cryptococcus neoformans var. grubii serotype A (strain H99 / ATCC 208821 / CBS 10515 / FGSC 9487) OX=235443 GN=CNAG_02730 PE=4 SV=1	1	0_0_1_0_0_0_0_	0.023	0	0	5	0	0	FALSE	FALSE	FALSE
P	J9VT28	3	0	6	0	0	0	0	0.000137083	0	0.000170191	0	0	0	0	0	0	0.0471286	0	0	0	0	0	0	5	0	0	0	0	0	0	0.02	0	0	0	0	Uncharacterized protein OS=Cryptococcus neoformans var. grubii serotype A (strain H99 / ATCC 208821 / CBS 10515 / FGSC 9487) OX=235443 GN=CNAG_07672 PE=4 SV=2	1	0_0_1_0_0_0_0_	0.01	0	0	5	0	0	FALSE	FALSE	FALSE
P	J9VSI4	12	0	22	0	0	3	0	0.00077034	0	0.000751448	0	0	0	0	0	0	0.193988	0	0	0	0	0	0	5	0	0	0	0	0	0	0.077	0	0	0	0	Chlorophyll synthesis pathway protein BchC OS=Cryptococcus neoformans var. grubii serotype A (strain H99 / ATCC 208821 / CBS 10515 / FGSC 9487) OX=235443 GN=CNAG_01558 PE=3 SV=1	1	0_0_1_0_0_0_0_	0.0385	0	0	5	0	0	FALSE	FALSE	FALSE
P	J9VSK8	9	0	16	0	11	12	0	0.00115692	0	0.00123114	0	0	0	0	0.0616956	0	0	0	0	0	0	5	0	0	0	0	0	0	0.026	0	0	0	0	0	0	Zinc finger protein OS=Cryptococcus neoformans var. grubii serotype A (strain H99 / ATCC 208821 / CBS 10515 / FGSC 9487) OX=235443 GN=CNAG_04697 PE=4 SV=2	1	1_0_0_0_0_0_0_	0.013	0	0	5	0	0	FALSE	FALSE	FALSE
P	J9VTF0	3	0	2	0	0	0	2	0.000498169	0	0.000147258	0	0	0	0	0	0	0.164126	0	0	0	0	0	0	5	0	0	0	0	0	0	0.066	0	0	0	0	Translation initiation factor eIF-2B subunit gamma OS=Cryptococcus neoformans var. grubii serotype A (strain H99 / ATCC 208821 / CBS 10515 / FGSC 9487) OX=235443 GN=CNAG_04260 PE=4 SV=2	1	0_0_1_0_0_0_0_	0.033	0	0	5	0	0	FALSE	FALSE	FALSE
P	J9VTF3	0	0	3	0	0	0	0	0	0	0.000110415	0	0	0	0	0.111732	0	0	0	0	0	0	5	0	0	0	0	0	0	0.046	0	0	0	0	0	0	Uncharacterized protein OS=Cryptococcus neoformans var. grubii serotype A (strain H99 / ATCC 208821 / CBS 10515 / FGSC 9487) OX=235443 GN=CNAG_06019 PE=4 SV=2	1	1_0_0_0_0_0_0_	0.023	0	0	5	0	0	FALSE	FALSE	FALSE
P	J9VTE3	20	2	27	5	22	33	3	0.0115955	0.00381275	0.00822627	0.00889383	0.00430151	0.00273966	0	0	0	0.315225	0	0.315225	0.315225	0	0	0	4	0	9	7	0	0	0	0.119	0	0.119	0.119	0	Large subunit acidic ribosomal protein P1 OS=Cryptococcus neoformans var. grubii serotype A (strain H99 / ATCC 208821 / CBS 10515 / FGSC 9487) OX=235443 GN=CNAG_00655 PE=3 SV=1	3	0_0_1_0_1_1_0_	0.0595	0.119	0	4	16	0	FALSE	TRUE	FALSE	CNAG_00655
P	J9VU74	0	0	2	0	0	0	0	0	0	3.57099e-05	0	0.000158829	0.000130062	0	0	0	0.111732	0	0.0471286	0.111732	0	0	0	4	0	2	2	0	0	0	0.046	0	0.02	0.046	0	6-phosphofructo-2-kinase/fructose-2, 6-bisphosphatase OS=Cryptococcus neoformans var. grubii serotype A (strain H99 / ATCC 208821 / CBS 10515 / FGSC 9487) OX=235443 GN=CNAG_04221 PE=4 SV=2	3	0_0_1_0_1_1_0_	0.023	0.033	0	4	4	0	FALSE	FALSE	FALSE
P	J9VTA4	15	0	7	0	8	19	0	0.00598181	0	0.00118824	0	0.00059652	0	0	0.524053	0	0	0	0.291219	0	0	4	0	0	0	3	0	0	0.183	0	0	0	0.111	0	0	Uncharacterized protein OS=Cryptococcus neoformans var. grubii serotype A (strain H99 / ATCC 208821 / CBS 10515 / FGSC 9487) OX=235443 GN=CNAG_04002 PE=4 SV=1	2	1_0_0_0_1_0_0_	0.0915	0.0555	0	4	3	0	FALSE	FALSE	FALSE
P	J9VSX5	40	0	53	0	3	2	0	0.00192183	0	0.00179192	0	0	0.00018629	0	0.14025	0	0	0	0	0.145513	0	4	0	0	0	0	2	0	0.057	0	0	0	0	0.059	0	Tubulin beta chain OS=Cryptococcus neoformans var. grubii serotype A (strain H99 / ATCC 208821 / CBS 10515 / FGSC 9487) OX=235443 GN=CNAG_04948 PE=3 SV=2	2	1_0_0_0_0_1_0_	0.0285	0.0295	0	4	2	0	FALSE	FALSE	FALSE
P	J9VU43	35	0	55	0	11	28	12	0.00405868	0	0.00366466	0	0	0.000170984	0	0	0	0.180321	0	0	0.235947	0	0	0	4	0	0	2	0	0	0	0.072	0	0	0.092	0	Serine hydroxymethyltransferase OS=Cryptococcus neoformans var. grubii serotype A (strain H99 / ATCC 208821 / CBS 10515 / FGSC 9487) OX=235443 GN=CNAG_04601 PE=3 SV=1	2	0_0_1_0_0_1_0_	0.036	0.046	0	4	2	0	FALSE	FALSE	FALSE
P	J9VSX3	3	0	5	0	2	3	0	0.000215737	0	0.000214273	0	0	0	0.00127723	0	0	0.279381	0	0	0	0.210598	0	0	4	0	0	0	2	0	0	0.107	0	0	0	0.083	DNA-directed RNA polymerase III subunit RPC4 OS=Cryptococcus neoformans var. grubii serotype A (strain H99 / ATCC 208821 / CBS 10515 / FGSC 9487) OX=235443 GN=CNAG_02520 PE=4 SV=1	2	0_0_1_0_0_0_1_	0.0535	0	0.083	4	0	2	FALSE	FALSE	FALSE
P	J9VTF4	0	0	3	0	0	0	0	0	0	0.000336102	0	0	0	0	0	0	0.202264	0	0	0	0	0	0	4	0	0	0	0	0	0	0.08	0	0	0	0	Lactoylglutathione lyase, variant OS=Cryptococcus neoformans var. grubii serotype A (strain H99 / ATCC 208821 / CBS 10515 / FGSC 9487) OX=235443 GN=CNAG_04219 PE=4 SV=1	1	0_0_1_0_0_0_0_	0.04	0	0	4	0	0	FALSE	FALSE	FALSE
P	J9VTG6	4	0	2	0	0	0	0	0.000679851	0	0.000103352	0	0	0	0	0	0	0.164126	0	0	0	0	0	0	4	0	0	0	0	0	0	0.066	0	0	0	0	Tryptophan synthase OS=Cryptococcus neoformans var. grubii serotype A (strain H99 / ATCC 208821 / CBS 10515 / FGSC 9487) OX=235443 GN=CNAG_00649 PE=3 SV=1	1	0_0_1_0_0_0_0_	0.033	0	0	4	0	0	FALSE	FALSE	FALSE
P	J9VTH9	0	8	5	2	0	11	0	0	0.0201257	0.000939883	0.00512141	0	0	0	0	0	0.0641431	0	0	0	0	0	0	4	0	0	0	0	0	0	0.027	0	0	0	0	Uncharacterized protein OS=Cryptococcus neoformans var. grubii serotype A (strain H99 / ATCC 208821 / CBS 10515 / FGSC 9487) OX=235443 GN=CNAG_00858 PE=4 SV=1	1	0_0_1_0_0_0_0_	0.0135	0	0	4	0	0	FALSE	FALSE	FALSE
P	J9VTA9	10	0	31	0	27	40	0	0.00491044	0	0.00780336	0	0	0	0	0	0	0.0641431	0	0	0	0	0	0	4	0	0	0	0	0	0	0.027	0	0	0	0	Uncharacterized protein OS=Cryptococcus neoformans var. grubii serotype A (strain H99 / ATCC 208821 / CBS 10515 / FGSC 9487) OX=235443 GN=CNAG_02744 PE=4 SV=2	1	0_0_1_0_0_0_0_	0.0135	0	0	4	0	0	FALSE	FALSE	FALSE
P	J9VTC1	15	0	24	0	38	27	3	0.0110177	0	0.00830485	0	0	0	0	0	0	0.0641431	0	0	0	0	0	0	4	0	0	0	0	0	0	0.027	0	0	0	0	Uncharacterized protein OS=Cryptococcus neoformans var. grubii serotype A (strain H99 / ATCC 208821 / CBS 10515 / FGSC 9487) OX=235443 GN=CNAG_07793 PE=4 SV=2	1	0_0_1_0_0_0_0_	0.0135	0	0	4	0	0	FALSE	FALSE	FALSE
P	J9VTD6	21	0	31	0	4	4	3	0.00575279	0	0.00536163	0	0	0	0	0	0	0.261828	0	0	0	0	0	0	4	0	0	0	0	0	0	0.101	0	0	0	0	Ribosome biogenesis protein NOP53 OS=Cryptococcus neoformans var. grubii serotype A (strain H99 / ATCC 208821 / CBS 10515 / FGSC 9487) OX=235443 GN=CNAG_00513 PE=3 SV=1	1	0_0_1_0_0_0_0_	0.0505	0	0	4	0	0	FALSE	FALSE	FALSE
P	J9VTE6	0	0	0	0	5	3	0	0	0	0	0	0	0	0	0	0	0.321296	0	0	0	0	0	0	4	0	0	0	0	0	0	0.121	0	0	0	0	Serine-tRNA ligase OS=Cryptococcus neoformans var. grubii serotype A (strain H99 / ATCC 208821 / CBS 10515 / FGSC 9487) OX=235443 GN=CNAG_01435 PE=4 SV=1	1	0_0_1_0_0_0_0_	0.0605	0	0	4	0	0	FALSE	FALSE	FALSE
P	J9VSX0	0	0	3	0	0	2	0	0	0	0.000160354	0	0	0	0	0	0	0.0939563	0	0	0	0	0	0	4	0	0	0	0	0	0	0.039	0	0	0	0	Uncharacterized protein OS=Cryptococcus neoformans var. grubii serotype A (strain H99 / ATCC 208821 / CBS 10515 / FGSC 9487) OX=235443 GN=CNAG_02141 PE=4 SV=2	1	0_0_1_0_0_0_0_	0.0195	0	0	4	0	0	FALSE	FALSE	FALSE
P	J9VT96	14	2	50	0	21	39	3	0.00997387	0.00286959	0.0138568	0	0	0	0	0	0	0.137627	0	0	0	0	0	0	4	0	0	0	0	0	0	0.056	0	0	0	0	U2-associated protein SR140 OS=Cryptococcus neoformans var. grubii serotype A (strain H99 / ATCC 208821 / CBS 10515 / FGSC 9487) OX=235443 GN=CNAG_06685 PE=4 SV=2	1	0_0_1_0_0_0_0_	0.028	0	0	4	0	0	FALSE	FALSE	FALSE
P	J9VSZ7	3	0	2	0	3	2	0	0.000671047	0	0.000158688	0	0	0	0	0	0	0.0641431	0	0	0	0	0	0	4	0	0	0	0	0	0	0.027	0	0	0	0	Uncharacterized protein OS=Cryptococcus neoformans var. grubii serotype A (strain H99 / ATCC 208821 / CBS 10515 / FGSC 9487) OX=235443 GN=CNAG_07706 PE=4 SV=1	1	0_0_1_0_0_0_0_	0.0135	0	0	4	0	0	FALSE	FALSE	FALSE
P	J9VTV9	4	0	0	0	0	0	0	0.000261456	0	0	0	0	0	0	0	0	0.0641431	0	0	0	0	0	0	4	0	0	0	0	0	0	0.027	0	0	0	0	Uncharacterized protein OS=Cryptococcus neoformans var. grubii serotype A (strain H99 / ATCC 208821 / CBS 10515 / FGSC 9487) OX=235443 GN=CNAG_06299 PE=4 SV=2	1	0_0_1_0_0_0_0_	0.0135	0	0	4	0	0	FALSE	FALSE	FALSE
P	J9VTV3	7	0	14	0	6	4	2	0.00129178	0	0.000973711	0	0	0	0	0	0	0.0641431	0	0	0	0	0	0	4	0	0	0	0	0	0	0.027	0	0	0	0	Uncharacterized protein OS=Cryptococcus neoformans var. grubii serotype A (strain H99 / ATCC 208821 / CBS 10515 / FGSC 9487) OX=235443 GN=CNAG_06943 PE=4 SV=2	1	0_0_1_0_0_0_0_	0.0135	0	0	4	0	0	FALSE	FALSE	FALSE
P	J9VTW1	2	0	0	0	0	0	0	0.000615271	0	0	0	0	0	0	0	0	0.127197	0	0	0	0	0	0	4	0	0	0	0	0	0	0.052	0	0	0	0	GPN-loop GTPase OS=Cryptococcus neoformans var. grubii serotype A (strain H99 / ATCC 208821 / CBS 10515 / FGSC 9487) OX=235443 GN=CNAG_01363 PE=3 SV=1	1	0_0_1_0_0_0_0_	0.026	0	0	4	0	0	FALSE	FALSE	FALSE
P	J9VU81	5	0	3	0	0	0	2	0.000218985	0	8.8775e-05	0	0	0	0	0	0	0.199499	0	0	0	0	0	0	4	0	0	0	0	0	0	0.079	0	0	0	0	Lactoylglutathione lyase OS=Cryptococcus neoformans var. grubii serotype A (strain H99 / ATCC 208821 / CBS 10515 / FGSC 9487) OX=235443 GN=CNAG_04219 PE=3 SV=2	1	0_0_1_0_0_0_0_	0.0395	0	0	4	0	0	FALSE	FALSE	FALSE
P	J9VU85	0	0	4	0	0	0	0	0	0	0.000589653	0	0	0	0	0	0	0.158777	0	0	0	0	0	0	4	0	0	0	0	0	0	0.064	0	0	0	0	Ribosome biogenesis protein SSF1/2 OS=Cryptococcus neoformans var. grubii serotype A (strain H99 / ATCC 208821 / CBS 10515 / FGSC 9487) OX=235443 GN=CNAG_01593 PE=4 SV=1	1	0_0_1_0_0_0_0_	0.032	0	0	4	0	0	FALSE	FALSE	FALSE
P	J9VU89	0	0	2	0	2	0	0	0	0	0.000470731	0	0	0	0	0.0641431	0	0.0764652	0	0	0	0	2	0	2	0	0	0	0	0.027	0	0.032	0	0	0	0	Mechanosensitive ion channel protein OS=Cryptococcus neoformans var. grubii serotype A (strain H99 / ATCC 208821 / CBS 10515 / FGSC 9487) OX=235443 GN=CNAG_01704 PE=3 SV=1	2	1_0_1_0_0_0_0_	0.0295	0	0	4	0	0	FALSE	FALSE	FALSE
P	J9VTY7	2	0	7	0	8	5	0	0.000345305	0	0.00171481	0	0	0	0	0	0	0.0616956	0	0	0	0	0	0	4	0	0	0	0	0	0	0.026	0	0	0	0	ATP-dependent RNA helicase DDX51/DBP6 OS=Cryptococcus neoformans var. grubii serotype A (strain H99 / ATCC 208821 / CBS 10515 / FGSC 9487) OX=235443 GN=CNAG_07609 PE=3 SV=1	1	0_0_1_0_0_0_0_	0.013	0	0	4	0	0	FALSE	FALSE	FALSE
P	J9VU39	4	0	2	0	0	0	0	0.000186931	0	5.30464e-05	0	0	0	0	0	0	0.0447202	0	0	0	0	0	0	4	0	0	0	0	0	0	0.019	0	0	0	0	Pre-mRNA-splicing helicase BRR2 OS=Cryptococcus neoformans var. grubii serotype A (strain H99 / ATCC 208821 / CBS 10515 / FGSC 9487) OX=235443 GN=CNAG_06585 PE=4 SV=1	1	0_0_1_0_0_0_0_	0.0095	0	0	4	0	0	FALSE	FALSE	FALSE
P	J9VTS8	4	0	2	0	0	0	0	0.000440296	0	0.000104121	0	0	0	0	0.109175	0	0.0351422	0	0	0	0	2	0	2	0	0	0	0	0.045	0	0.015	0	0	0	0	Protein SDA1 OS=Cryptococcus neoformans var. grubii serotype A (strain H99 / ATCC 208821 / CBS 10515 / FGSC 9487) OX=235443 GN=CNAG_04222 PE=3 SV=1	2	1_0_1_0_0_0_0_	0.03	0	0	4	0	0	FALSE	FALSE	FALSE
P	J9VTS1	0	0	2	0	0	0	0	0	0	9.98521e-05	0	0	0	0	0	0	0.0519619	0	0	0	0	0	0	4	0	0	0	0	0	0	0.022	0	0	0	0	Kinesin-like protein OS=Cryptococcus neoformans var. grubii serotype A (strain H99 / ATCC 208821 / CBS 10515 / FGSC 9487) OX=235443 GN=CNAG_06335 PE=3 SV=1	1	0_0_1_0_0_0_0_	0.011	0	0	4	0	0	FALSE	FALSE	FALSE
P	J9VU53	3	0	4	0	0	0	0	0.000200406	0	0.000355438	0	0	0	0	0	0	0.0209395	0	0	0	0	0	0	4	0	0	0	0	0	0	0.009	0	0	0	0	L-aminoadipate-semialdehyde dehydrogenase OS=Cryptococcus neoformans var. grubii serotype A (strain H99 / ATCC 208821 / CBS 10515 / FGSC 9487) OX=235443 GN=CNAG_03588 PE=4 SV=1	1	0_0_1_0_0_0_0_	0.0045	0	0	4	0	0	FALSE	FALSE	FALSE
P	J9VV35	0	0	0	2	0	0	0	0	0	0	0.00331779	0	0.000651305	0	0	0	0.0447202	0	0	0.0256519	0	0	0	3	0	0	8	0	0	0	0.019	0	0	0.011	0	Uncharacterized protein OS=Cryptococcus neoformans var. grubii serotype A (strain H99 / ATCC 208821 / CBS 10515 / FGSC 9487) OX=235443 GN=CNAG_01322 PE=4 SV=2	2	0_0_1_0_0_1_0_	0.0095	0.0055	0	3	8	0	FALSE	FALSE	FALSE
P	J9VTL8	0	0	4	0	0	0	0	0	0	0.000230523	0	8.18477e-05	6.70235e-05	0	0	0	0.0375284	0	0.0351422	0.0447202	0	0	0	3	0	2	2	0	0	0	0.016	0	0.015	0.019	0	Myosin-1 OS=Cryptococcus neoformans var. grubii serotype A (strain H99 / ATCC 208821 / CBS 10515 / FGSC 9487) OX=235443 GN=CNAG_05172 PE=3 SV=2	3	0_0_1_0_1_1_0_	0.008	0.017	0	3	4	0	FALSE	FALSE	FALSE
P	J9VUL6	0	0	0	0	2	0	0	0	0	0	0	0.000134964	0	0	0	0	0.0495424	0	0.0990058	0	0	0	0	3	0	3	0	0	0	0	0.021	0	0.041	0	0	Ribosome biogenesis protein BMS1 OS=Cryptococcus neoformans var. grubii serotype A (strain H99 / ATCC 208821 / CBS 10515 / FGSC 9487) OX=235443 GN=CNAG_01715 PE=4 SV=1	2	0_0_1_0_1_0_0_	0.0105	0.0205	0	3	3	0	FALSE	FALSE	FALSE
P	J9VUK5	0	0	0	0	2	0	0	0	0	0	0	0	0.000329424	0	0	0	0.142878	0	0	0.0641431	0	0	0	3	0	0	2	0	0	0	0.058	0	0	0.027	0	6-phosphogluconate dehydrogenase, decarboxylating OS=Cryptococcus neoformans var. grubii serotype A (strain H99 / ATCC 208821 / CBS 10515 / FGSC 9487) OX=235443 GN=CNAG_04099 PE=4 SV=1	2	0_0_1_0_0_1_0_	0.029	0.0135	0	3	2	0	FALSE	FALSE	FALSE
P	J9VV17	0	0	4	0	3	0	0	0	0	0.000454683	0	0.000237881	0	0	0	0	0.233105	0	0.158777	0	0	0	0	3	0	2	0	0	0	0	0.091	0	0.064	0	0	Actin binding protein OS=Cryptococcus neoformans var. grubii serotype A (strain H99 / ATCC 208821 / CBS 10515 / FGSC 9487) OX=235443 GN=CNAG_01402 PE=3 SV=1	2	0_0_1_0_1_0_0_	0.0455	0.032	0	3	2	0	FALSE	FALSE	FALSE
P	J9VVK6	4	0	10	0	0	0	0	0.000387058	0	0.000604105	0	0.000204298	0	0	0	0	0.156112	0	0.0990058	0	0	0	0	3	0	2	0	0	0	0	0.063	0	0.041	0	0	Protein MAK11 OS=Cryptococcus neoformans var. grubii serotype A (strain H99 / ATCC 208821 / CBS 10515 / FGSC 9487) OX=235443 GN=CNAG_01898 PE=4 SV=1	2	0_0_1_0_1_0_0_	0.0315	0.0205	0	3	2	0	FALSE	FALSE	FALSE
P	J9VU64	5	0	2	0	2	0	0	0.000289655	0	0.000164393	0	0	0	0	0	0	0.0690548	0	0	0	0	0	0	3	0	0	0	0	0	0	0.029	0	0	0	0	DNA-directed RNA polymerase subunit beta OS=Cryptococcus neoformans var. grubii serotype A (strain H99 / ATCC 208821 / CBS 10515 / FGSC 9487) OX=235443 GN=CNAG_01235 PE=3 SV=1	1	0_0_1_0_0_0_0_	0.0145	0	0	3	0	0	FALSE	FALSE	FALSE
P	J9VU02	0	0	3	0	0	0	0	0	0	9.40935e-05	0	0	0	0	0	0	0.0139114	0	0	0	0	0	0	3	0	0	0	0	0	0	0.006	0	0	0	0	Uncharacterized protein OS=Cryptococcus neoformans var. grubii serotype A (strain H99 / ATCC 208821 / CBS 10515 / FGSC 9487) OX=235443 GN=CNAG_01613 PE=4 SV=1	1	0_0_1_0_0_0_0_	0.003	0	0	3	0	0	FALSE	FALSE	FALSE
P	J9VU15	0	0	3	0	0	0	0	0	0	0.000401268	0	0	0	0	0	0	0.114295	0	0	0	0	0	0	3	0	0	0	0	0	0	0.047	0	0	0	0	Uncharacterized protein OS=Cryptococcus neoformans var. grubii serotype A (strain H99 / ATCC 208821 / CBS 10515 / FGSC 9487) OX=235443 GN=CNAG_00663 PE=4 SV=2	1	0_0_1_0_0_0_0_	0.0235	0	0	3	0	0	FALSE	FALSE	FALSE
P	J9VU28	25	0	23	0	21	16	0	0.021432	0	0.0114701	0	0	0	0	0	0	0.191242	0	0	0	0	0	0	3	0	0	0	0	0	0	0.076	0	0	0	0	Acetyl-coenzyme A synthetase OS=Cryptococcus neoformans var. grubii serotype A (strain H99 / ATCC 208821 / CBS 10515 / FGSC 9487) OX=235443 GN=CNAG_00797 PE=1 SV=1	1	0_0_1_0_0_0_0_	0.038	0	0	3	0	0	FALSE	FALSE	FALSE
P	J9VTL0	2	0	4	0	0	0	0	0.000119035	0	0.000253343	0	0	0	0	0.180321	0	0	0	0	0	0	3	0	0	0	0	0	0	0.072	0	0	0	0	0	0	Uncharacterized protein OS=Cryptococcus neoformans var. grubii serotype A (strain H99 / ATCC 208821 / CBS 10515 / FGSC 9487) OX=235443 GN=CNAG_03878 PE=4 SV=1	1	1_0_0_0_0_0_0_	0.036	0	0	3	0	0	FALSE	FALSE	FALSE
P	J9VUJ9	2	0	2	0	0	0	0	8.82233e-05	0	6.25888e-05	0	0	0	0	0	0	0.0351422	0	0	0	0	0	0	3	0	0	0	0	0	0	0.015	0	0	0	0	Translation initiation factor OS=Cryptococcus neoformans var. grubii serotype A (strain H99 / ATCC 208821 / CBS 10515 / FGSC 9487) OX=235443 GN=CNAG_04022 PE=4 SV=2	1	0_0_1_0_0_0_0_	0.0075	0	0	3	0	0	FALSE	FALSE	FALSE
P	J9VUK7	0	0	2	0	3	0	0	0	0	7.25609e-05	0	0	0	0	0	0	0.0495424	0	0	0	0	0	0	3	0	0	0	0	0	0	0.021	0	0	0	0	ATP-dependent RNA helicase A OS=Cryptococcus neoformans var. grubii serotype A (strain H99 / ATCC 208821 / CBS 10515 / FGSC 9487) OX=235443 GN=CNAG_04051 PE=4 SV=2	1	0_0_1_0_0_0_0_	0.0105	0	0	3	0	0	FALSE	FALSE	FALSE
P	J9VUD2	5	0	0	0	0	0	0	0.000387692	0	0	0	0	0	0	0.0715193	0	0	0	0	0	0	3	0	0	0	0	0	0	0.03	0	0	0	0	0	0	Uncharacterized protein OS=Cryptococcus neoformans var. grubii serotype A (strain H99 / ATCC 208821 / CBS 10515 / FGSC 9487) OX=235443 GN=CNAG_03655 PE=4 SV=1	1	1_0_0_0_0_0_0_	0.015	0	0	3	0	0	FALSE	FALSE	FALSE
P	J9VUD6	11	4	18	0	9	7	0	0.00605359	0.0127219	0.00466808	0	0	0	0	0.0592537	0	0	0	0	0	0	3	0	0	0	0	0	0	0.025	0	0	0	0	0	0	Phosphoketolase OS=Cryptococcus neoformans var. grubii serotype A (strain H99 / ATCC 208821 / CBS 10515 / FGSC 9487) OX=235443 GN=CNAG_02230 PE=4 SV=2	1	1_0_0_0_0_0_0_	0.0125	0	0	3	0	0	FALSE	FALSE	FALSE
P	J9VUF9	3	0	0	0	0	3	0	0.000592792	0	0	0	0	0	0	0	0	0.0665962	0	0	0	0	0	0	3	0	0	0	0	0	0	0.028	0	0	0	0	Pre-mRNA-splicing factor SLU7 OS=Cryptococcus neoformans var. grubii serotype A (strain H99 / ATCC 208821 / CBS 10515 / FGSC 9487) OX=235443 GN=CNAG_01159 PE=4 SV=2	1	0_0_1_0_0_0_0_	0.014	0	0	3	0	0	FALSE	FALSE	FALSE
P	J9VUB1	8	4	11	6	8	6	6	0.0061328	0.0105869	0.00625432	0.00864342	0	0	0	0	0	0.0690548	0	0	0	0	0	0	3	0	0	0	0	0	0	0.029	0	0	0	0	DNA-directed RNA polymerase subunit beta OS=Cryptococcus neoformans var. grubii serotype A (strain H99 / ATCC 208821 / CBS 10515 / FGSC 9487) OX=235443 GN=CNAG_01235 PE=3 SV=2	1	0_0_1_0_0_0_0_	0.0145	0	0	3	0	0	FALSE	FALSE	FALSE
P	J9VUA7	0	0	2	0	0	0	0	0	0	0.000156036	0	0	0	0	0	0	0.0568175	0	0	0	0	0	0	3	0	0	0	0	0	0	0.024	0	0	0	0	Kinesin family member 20/23 OS=Cryptococcus neoformans var. grubii serotype A (strain H99 / ATCC 208821 / CBS 10515 / FGSC 9487) OX=235443 GN=CNAG_02051 PE=3 SV=1	1	0_0_1_0_0_0_0_	0.012	0	0	3	0	0	FALSE	FALSE	FALSE
P	J9VTZ1	5	0	8	0	0	0	0	0.00012354	0	0.000463261	0	0	0	0	0	0	0.361445	0	0	0	0	0	0	3	0	0	0	0	0	0	0.134	0	0	0	0	Cytochrome c oxidase subunit OS=Cryptococcus neoformans var. grubii serotype A (strain H99 / ATCC 208821 / CBS 10515 / FGSC 9487) OX=235443 GN=CNAG_05839 PE=3 SV=2	1	0_0_1_0_0_0_0_	0.067	0	0	3	0	0	FALSE	FALSE	FALSE
P	J9VUX2	5	0	5	0	0	2	0	0.000388965	0	0.000172466	0	0	0	0	0	0	0.0471286	0	0	0	0	0	0	3	0	0	0	0	0	0	0.02	0	0	0	0	26S protease regulatory subunit 7 OS=Cryptococcus neoformans var. grubii serotype A (strain H99 / ATCC 208821 / CBS 10515 / FGSC 9487) OX=235443 GN=CNAG_07719 PE=3 SV=2	1	0_0_1_0_0_0_0_	0.01	0	0	3	0	0	FALSE	FALSE	FALSE
P	J9VV50	8	8	23	11	27	27	2	0.00428639	0.01402	0.00688209	0.011628	0	0	0	0	0	0.16681	0	0	0	0	0	0	3	0	0	0	0	0	0	0.067	0	0	0	0	Asparagine-tRNA ligase OS=Cryptococcus neoformans var. grubii serotype A (strain H99 / ATCC 208821 / CBS 10515 / FGSC 9487) OX=235443 GN=CNAG_02418 PE=4 SV=1	1	0_0_1_0_0_0_0_	0.0335	0	0	3	0	0	FALSE	FALSE	FALSE
P	J9VV51	0	0	5	0	11	5	0	0	0	0.00193905	0	0	0	0	0	0	0.250259	0	0	0	0	0	0	3	0	0	0	0	0	0	0.097	0	0	0	0	6-phosphogluconolactonase OS=Cryptococcus neoformans var. grubii serotype A (strain H99 / ATCC 208821 / CBS 10515 / FGSC 9487) OX=235443 GN=CNAG_02133 PE=3 SV=1	1	0_0_1_0_0_0_0_	0.0485	0	0	3	0	0	FALSE	FALSE	FALSE
P	J9VUT4	6	0	9	0	10	9	0	0.0013818	0	0.00154047	0	0	0	0	0	0	0.270574	0	0	0	0	0	0	3	0	0	0	0	0	0	0.104	0	0	0	0	Adenosylhomocysteinase OS=Cryptococcus neoformans var. grubii serotype A (strain H99 / ATCC 208821 / CBS 10515 / FGSC 9487) OX=235443 GN=CNAG_00886 PE=3 SV=2	1	0_0_1_0_0_0_0_	0.052	0	0	3	0	0	FALSE	FALSE	FALSE
P	J9VUU8	4	0	11	0	14	2	0	0.00184486	0	0.00366466	0	0	0	0	0.111732	0	0	0	0	0	0	3	0	0	0	0	0	0	0.046	0	0	0	0	0	0	Glucose-6-phosphate 1-dehydrogenase OS=Cryptococcus neoformans var. grubii serotype A (strain H99 / ATCC 208821 / CBS 10515 / FGSC 9487) OX=235443 GN=CNAG_03245 PE=3 SV=1	1	1_0_0_0_0_0_0_	0.023	0	0	3	0	0	FALSE	FALSE	FALSE
P	J9VUW2	594	0	555	0	290	293	25	0.0693038	0	0.0353142	0	0	0	0	0	0	0.0399202	0	0	0	0	0	0	3	0	0	0	0	0	0	0.017	0	0	0	0	Uncharacterized protein OS=Cryptococcus neoformans var. grubii serotype A (strain H99 / ATCC 208821 / CBS 10515 / FGSC 9487) OX=235443 GN=CNAG_01277 PE=4 SV=2	1	0_0_1_0_0_0_0_	0.0085	0	0	3	0	0	FALSE	FALSE	FALSE
P	J9VUR6	2	0	2	0	4	0	0	0.000454838	0	0.000322679	0	0	0	0	0	0	0.124605	0	0	0	0	0	0	3	0	0	0	0	0	0	0.051	0	0	0	0	Glycerol kinase OS=Cryptococcus neoformans var. grubii serotype A (strain H99 / ATCC 208821 / CBS 10515 / FGSC 9487) OX=235443 GN=CNAG_01155 PE=3 SV=2	1	0_0_1_0_0_0_0_	0.0255	0	0	3	0	0	FALSE	FALSE	FALSE
P	J9VUR9	5	0	10	0	2	0	0	0.000412477	0	0.000543449	0	0	0	0	0	0	0.0139114	0	0	0	0	0	0	3	0	0	0	0	0	0	0.006	0	0	0	0	Uncharacterized protein OS=Cryptococcus neoformans var. grubii serotype A (strain H99 / ATCC 208821 / CBS 10515 / FGSC 9487) OX=235443 GN=CNAG_01613 PE=4 SV=2	1	0_0_1_0_0_0_0_	0.003	0	0	3	0	0	FALSE	FALSE	FALSE
P	J9VV48	11	0	13	0	7	6	0	0.00071135	0	0.00072895	0	0	0	0	0	0	0.0665962	0	0	0	0	0	0	3	0	0	0	0	0	0	0.028	0	0	0	0	Uncharacterized protein OS=Cryptococcus neoformans var. grubii serotype A (strain H99 / ATCC 208821 / CBS 10515 / FGSC 9487) OX=235443 GN=CNAG_04146 PE=4 SV=1	1	0_0_1_0_0_0_0_	0.014	0	0	3	0	0	FALSE	FALSE	FALSE
P	J9VUN2	4	0	9	0	0	0	0	8.42238e-05	0	0.000268882	0	0	0	0	0	0	0.686553	0	0	0	0	0	0	3	0	0	0	0	0	0	0.227	0	0	0	0	Uncharacterized protein OS=Cryptococcus neoformans var. grubii serotype A (strain H99 / ATCC 208821 / CBS 10515 / FGSC 9487) OX=235443 GN=CNAG_06274 PE=4 SV=1	1	0_0_1_0_0_0_0_	0.1135	0	0	3	0	0	FALSE	FALSE	FALSE
P	J9VUN1	0	0	0	0	2	0	0	0	0	0	0	0	0	0	0	0	0.923092	0	0	0	0	0	0	3	0	0	0	0	0	0	0.284	0	0	0	0	Proteasome subunit alpha type OS=Cryptococcus neoformans var. grubii serotype A (strain H99 / ATCC 208821 / CBS 10515 / FGSC 9487) OX=235443 GN=CNAG_05475 PE=3 SV=1	1	0_0_1_0_0_0_0_	0.142	0	0	3	0	0	FALSE	FALSE	FALSE
P	J9VVJ6	3	0	5	0	0	0	0	0.000206521	0	0.000195351	0	0	0	0	0.0568175	0	0	0	0	0	0	3	0	0	0	0	0	0	0.024	0	0	0	0	0	0	Uncharacterized protein OS=Cryptococcus neoformans var. grubii serotype A (strain H99 / ATCC 208821 / CBS 10515 / FGSC 9487) OX=235443 GN=CNAG_03440 PE=4 SV=2	1	1_0_0_0_0_0_0_	0.012	0	0	3	0	0	FALSE	FALSE	FALSE
P	J9VVM9	3	0	9	0	0	0	0	7.26179e-05	0	0.000240416	0	0.000348081	0	0	0	0	0.119438	0	0.124605	0	0	0	0	2	0	3	0	0	0	0	0.049	0	0.051	0	0	RNA-binding protein rnp24 OS=Cryptococcus neoformans var. grubii serotype A (strain H99 / ATCC 208821 / CBS 10515 / FGSC 9487) OX=235443 GN=CNAG_00706 PE=4 SV=1	2	0_0_1_0_1_0_0_	0.0245	0.0255	0	2	3	0	FALSE	FALSE	FALSE
P	J9VVY8	0	0	3	0	0	0	0	0	0	5.20362e-05	0	0.000115855	0	0	0	0	0.0256519	0	0.0592537	0	0	0	0	2	0	3	0	0	0	0	0.011	0	0.025	0	0	Uncharacterized protein OS=Cryptococcus neoformans var. grubii serotype A (strain H99 / ATCC 208821 / CBS 10515 / FGSC 9487) OX=235443 GN=CNAG_06158 PE=4 SV=2	2	0_0_1_0_1_0_0_	0.0055	0.0125	0	2	3	0	FALSE	FALSE	FALSE
P	J9VVR0	6	0	6	0	0	2	0	0.000363413	0	0.000164067	0	0.000875564	0	0	0	0	0.16681	0	0.361445	0	0	0	0	2	0	2	0	0	0	0	0.067	0	0.134	0	0	Small subunit ribosomal protein S20 OS=Cryptococcus neoformans var. grubii serotype A (strain H99 / ATCC 208821 / CBS 10515 / FGSC 9487) OX=235443 GN=CNAG_01628 PE=3 SV=1	2	0_0_1_0_1_0_0_	0.0335	0.067	0	2	2	0	FALSE	FALSE	FALSE
P	J9VVA5	8	0	6	0	2	0	7	0.000405894	0	0.00032635	0	0	0	0.000777886	0	0	0.0351422	0	0	0	0.0351422	0	0	2	0	0	0	2	0	0	0.015	0	0	0	0.015	Multifunctional tryptophan biosynthesis protein OS=Cryptococcus neoformans var. grubii serotype A (strain H99 / ATCC 208821 / CBS 10515 / FGSC 9487) OX=235443 GN=TRP1 PE=3 SV=2	2	0_0_1_0_0_0_1_	0.0075	0	0.015	2	0	2	FALSE	FALSE	FALSE
P	J9VVL6	0	0	5	0	0	3	0	0	0	0.00154378	0	0	0	0	0	0	0.0495424	0	0	0	0	0	0	2	0	0	0	0	0	0	0.021	0	0	0	0	Cell division control protein 25, variant OS=Cryptococcus neoformans var. grubii serotype A (strain H99 / ATCC 208821 / CBS 10515 / FGSC 9487) OX=235443 GN=CNAG_07942 PE=4 SV=1	1	0_0_1_0_0_0_0_	0.0105	0	0	2	0	0	FALSE	FALSE	FALSE
P	J9VVM5	28	0	22	0	18	8	0	0.00643283	0	0.00787459	0	0	0	0	0	0	0.0568175	0	0	0	0	0	0	2	0	0	0	0	0	0	0.024	0	0	0	0	Exosome complex component RRP4 OS=Cryptococcus neoformans var. grubii serotype A (strain H99 / ATCC 208821 / CBS 10515 / FGSC 9487) OX=235443 GN=CNAG_00089 PE=4 SV=1	1	0_0_1_0_0_0_0_	0.012	0	0	2	0	0	FALSE	FALSE	FALSE
P	J9VVM7	4	0	3	0	0	0	0	0.000842238	0	0.000224068	0	0	0	0	0	0	0.0839269	0	0	0	0	0	0	2	0	0	0	0	0	0	0.035	0	0	0	0	CTP synthase OS=Cryptococcus neoformans var. grubii serotype A (strain H99 / ATCC 208821 / CBS 10515 / FGSC 9487) OX=235443 GN=CNAG_07502 PE=3 SV=1	1	0_0_1_0_0_0_0_	0.0175	0	0	2	0	0	FALSE	FALSE	FALSE
P	J9VVE8	0	0	0	0	3	0	0	0	0	0	0	0	0	0	0.0592537	0	0	0	0	0	0	2	0	0	0	0	0	0	0.025	0	0	0	0	0	0	Uncharacterized protein OS=Cryptococcus neoformans var. grubii serotype A (strain H99 / ATCC 208821 / CBS 10515 / FGSC 9487) OX=235443 GN=CNAG_03921 PE=4 SV=1	1	1_0_0_0_0_0_0_	0.0125	0	0	2	0	0	FALSE	FALSE	FALSE
P	J9VVH4	5	0	7	0	0	0	0	0.000125632	0	8.91281e-05	0	0	0	0	0.109175	0	0	0	0	0	0	2	0	0	0	0	0	0	0.045	0	0	0	0	0	0	Coronin OS=Cryptococcus neoformans var. grubii serotype A (strain H99 / ATCC 208821 / CBS 10515 / FGSC 9487) OX=235443 GN=CNAG_05301 PE=3 SV=2	1	1_0_0_0_0_0_0_	0.0225	0	0	2	0	0	FALSE	FALSE	FALSE
P	J9VVA4	11	2	23	0	3	2	0	0.000734247	0.000780004	0.00116201	0	0	0	0	0.129796	0	0	0	0	0	0	2	0	0	0	0	0	0	0.053	0	0	0	0	0	0	CMGC/GSK protein kinase, variant OS=Cryptococcus neoformans var. grubii serotype A (strain H99 / ATCC 208821 / CBS 10515 / FGSC 9487) OX=235443 GN=CNAG_06730 PE=3 SV=2	1	1_0_0_0_0_0_0_	0.0265	0	0	2	0	0	FALSE	FALSE	FALSE
P	J9VVC5	10	0	7	0	0	0	0	0.000458403	0	0.00044716	0	0	0	0	0	0	0.492794	0	0	0	0	0	0	2	0	0	0	0	0	0	0.174	0	0	0	0	DNA-directed RNA polymerase I, II, and III subunit rpabc5 OS=Cryptococcus neoformans var. grubii serotype A (strain H99 / ATCC 208821 / CBS 10515 / FGSC 9487) OX=235443 GN=CNAG_06734 PE=3 SV=2	1	0_0_1_0_0_0_0_	0.087	0	0	2	0	0	FALSE	FALSE	FALSE
P	J9VVZ9	3	0	4	0	11	14	0	0.000632691	0	0.000359083	0	0	0	0	0	0	0.177606	0	0	0	0	0	0	2	0	0	0	0	0	0	0.071	0	0	0	0	Uncharacterized protein OS=Cryptococcus neoformans var. grubii serotype A (strain H99 / ATCC 208821 / CBS 10515 / FGSC 9487) OX=235443 GN=CNAG_06686 PE=4 SV=1	1	0_0_1_0_0_0_0_	0.0355	0	0	2	0	0	FALSE	FALSE	FALSE
P	J9VW88	0	0	3	0	0	0	0	0	0	0.00127311	0	0	0	0	0	0	0.0690548	0	0	0	0	0	0	2	0	0	0	0	0	0	0.029	0	0	0	0	Ornithine aminotransferase OS=Cryptococcus neoformans var. grubii serotype A (strain H99 / ATCC 208821 / CBS 10515 / FGSC 9487) OX=235443 GN=CNAG_05134 PE=3 SV=1	1	0_0_1_0_0_0_0_	0.0145	0	0	2	0	0	FALSE	FALSE	FALSE
P	J9VVX1	0	0	3	0	3	0	0	0	0	0.000209409	0	0	0	0	0	0	0.0495424	0	0	0	0	0	0	2	0	0	0	0	0	0	0.021	0	0	0	0	Cell division control protein 25 OS=Cryptococcus neoformans var. grubii serotype A (strain H99 / ATCC 208821 / CBS 10515 / FGSC 9487) OX=235443 GN=CNAG_07942 PE=4 SV=2	1	0_0_1_0_0_0_0_	0.0105	0	0	2	0	0	FALSE	FALSE	FALSE
P	J9VW40	38	0	60	0	23	12	0	0.0111037	0	0.00984674	0	0	0	0	0	0	0.0764652	0	0	0	0	0	0	2	0	0	0	0	0	0	0.032	0	0	0	0	Succinate-semialdehyde dehydrogenase (NADP ) OS=Cryptococcus neoformans var. grubii serotype A (strain H99 / ATCC 208821 / CBS 10515 / FGSC 9487) OX=235443 GN=CNAG_01027 PE=3 SV=1	1	0_0_1_0_0_0_0_	0.016	0	0	2	0	0	FALSE	FALSE	FALSE
P	J9VVT7	3	0	4	0	8	3	0	0.000551395	0	0.000625888	0	0	0	0	0	0	0.0789467	0	0	0	0	0	0	2	0	0	0	0	0	0	0.033	0	0	0	0	Glycine-tRNA ligase OS=Cryptococcus neoformans var. grubii serotype A (strain H99 / ATCC 208821 / CBS 10515 / FGSC 9487) OX=235443 GN=CNAG_05900 PE=4 SV=2	1	0_0_1_0_0_0_0_	0.0165	0	0	2	0	0	FALSE	FALSE	FALSE
P	J9VWA9	2	0	2	0	0	0	0	0.000129868	0	5.52799e-05	0	0.00155558	0.0015598	0	0	0	0	0	0.412538	0.548817	0	0	0	0	0	49	60	0	0	0	0	0	0.15	0.19	0	Uncharacterized protein OS=Cryptococcus neoformans var. grubii serotype A (strain H99 / ATCC 208821 / CBS 10515 / FGSC 9487) OX=235443 GN=CNAG_00520 PE=1 SV=1	2	0_0_0_0_1_1_0_	0	0.17	0	0	109	0	FALSE	TRUE	FALSE	CNAG_00520
P	J9VWK6	28	2	33	2	7	6	3	0.00245266	0.000546316	0.00213291	0.00038231	0.00214439	0.00185929	0	0	0	0	0	0.815516	0.520548	0	0	0	0	0	17	18	0	0	0	0	0	0.259	0.182	0	Pre-60S factor REI1 OS=Cryptococcus neoformans var. grubii serotype A (strain H99 / ATCC 208821 / CBS 10515 / FGSC 9487) OX=235443 GN=CNAG_06742 PE=4 SV=1	2	0_0_0_0_1_1_0_	0	0.2205	0	0	35	0	FALSE	TRUE	FALSE	CNAG_06742
P	J9VX14	4	0	2	0	0	0	0	0.000275313	0	0.00011719	0	0.00037957	0.000310823	0	0	0	0	0	0.114295	0.164126	0	0	0	0	0	4	4	0	0	0	0	0	0.047	0.066	0	RNP domain-containing protein OS=Cryptococcus neoformans var. grubii serotype A (strain H99 / ATCC 208821 / CBS 10515 / FGSC 9487) OX=235443 GN=CNAG_05013 PE=1 SV=2	2	0_0_0_0_1_1_0_	0	0.0565	0	0	8	0	FALSE	FALSE	FALSE
P	J9VXL7	18	0	42	0	27	17	3	0.0051248	0	0.0109072	0	0	0.000444959	0	0	0	0	0	0	0.0185914	0	0	0	0	0	0	8	0	0	0	0	0	0	0.008	0	Dolichyl-phosphate-mannose-protein mannosyltransferase OS=Cryptococcus neoformans var. grubii serotype A (strain H99 / ATCC 208821 / CBS 10515 / FGSC 9487) OX=235443 GN=CNAG_00996 PE=4 SV=1	1	0_0_0_0_0_1_0_	0	0.004	0	0	8	0	FALSE	FALSE	FALSE
P	J9VYN9	11	0	11	0	7	6	0	0.00105809	0	0.00192353	0	0.00023195	0.000113964	0	0	0	0	0	0.101539	0.0471286	0	0	0	0	0	5	3	0	0	0	0	0	0.042	0.02	0	RNA-dependent RNA polymerase OS=Cryptococcus neoformans var. grubii serotype A (strain H99 / ATCC 208821 / CBS 10515 / FGSC 9487) OX=235443 GN=CNAG_03466 PE=3 SV=2	2	0_0_0_0_1_1_0_	0	0.031	0	0	8	0	FALSE	FALSE	FALSE
P	J9VW09	0	0	6	0	0	0	0	0	0	0.000267841	0	0.000324249	0.000354029	0	0	0	0	0	0.0447202	0.0447202	0	0	0	0	0	3	4	0	0	0	0	0	0.019	0.019	0	Uncharacterized protein OS=Cryptococcus neoformans var. grubii serotype A (strain H99 / ATCC 208821 / CBS 10515 / FGSC 9487) OX=235443 GN=CNAG_06831 PE=4 SV=1	2	0_0_0_0_1_1_0_	0	0.019	0	0	7	0	FALSE	FALSE	FALSE
P	J9VXQ9	0	0	2	0	0	0	0	0	0	0.000665285	0	0.00032092	0.000350394	0	0	0	0	0	0.0423174	0.0423174	0	0	0	0	0	3	4	0	0	0	0	0	0.018	0.018	0	Uncharacterized protein OS=Cryptococcus neoformans var. grubii serotype A (strain H99 / ATCC 208821 / CBS 10515 / FGSC 9487) OX=235443 GN=CNAG_06831 PE=4 SV=2	2	0_0_0_0_1_1_0_	0	0.018	0	0	7	0	FALSE	FALSE	FALSE
P	J9VXE8	45	3	68	5	63	66	3	0.0114391	0.00209701	0.00883345	0.00195664	0.000327648	0	0	0	0	0	0	0.0327615	0	0	0	0	0	0	6	0	0	0	0	0	0	0.014	0	0	Uncharacterized protein OS=Cryptococcus neoformans var. grubii serotype A (strain H99 / ATCC 208821 / CBS 10515 / FGSC 9487) OX=235443 GN=CNAG_01738 PE=4 SV=1	1	0_0_0_0_1_0_0_	0	0.007	0	0	6	0	FALSE	FALSE	FALSE
P	J9VXN3	3	0	9	0	0	0	0	9.33883e-05	0	0.000149069	0	0.000889011	0	0	0	0	0	0	0.161449	0	0	0	0	0	0	5	0	0	0	0	0	0	0.065	0	0	Uncharacterized protein OS=Cryptococcus neoformans var. grubii serotype A (strain H99 / ATCC 208821 / CBS 10515 / FGSC 9487) OX=235443 GN=CNAG_00585 PE=4 SV=1	1	0_0_0_0_1_0_0_	0	0.0325	0	0	5	0	FALSE	FALSE	FALSE
P	J9VYP7	4	0	4	0	3	2	0	0.000568641	0	0.000518676	0	0.00011264	9.22388e-05	0.0006324	0	0	0	0	0.0665962	0.0495424	0.0568175	0	0	0	0	2	2	2	0	0	0	0	0.028	0.021	0.024	NAD kinase OS=Cryptococcus neoformans var. grubii serotype A (strain H99 / ATCC 208821 / CBS 10515 / FGSC 9487) OX=235443 GN=CNAG_04316 PE=3 SV=2	3	0_0_0_0_1_1_1_	0	0.0245	0.024	0	4	2	FALSE	FALSE	FALSE
P	J9VWT6	4	0	0	0	0	0	0	0.00120243	0	0	0	0.000425274	0.000348249	0	0	0	0	0	0.264736	0.253141	0	0	0	0	0	2	2	0	0	0	0	0	0.102	0.098	0	Ribosome assembly factor mrt4 OS=Cryptococcus neoformans var. grubii serotype A (strain H99 / ATCC 208821 / CBS 10515 / FGSC 9487) OX=235443 GN=CNAG_03789 PE=3 SV=1	2	0_0_0_0_1_1_0_	0	0.1	0	0	4	0	FALSE	FALSE	FALSE
P	J9VWV5	0	0	3	0	0	0	0	0	0	0.000516935	0	0	0.00115299	0	0	0	0	0	0	0.721869	0	0	0	0	0	0	4	0	0	0	0	0	0	0.236	0	40S ribosomal protein S12 OS=Cryptococcus neoformans var. grubii serotype A (strain H99 / ATCC 208821 / CBS 10515 / FGSC 9487) OX=235443 GN=CNAG_02754 PE=3 SV=1	1	0_0_0_0_0_1_0_	0	0.118	0	0	4	0	FALSE	FALSE	FALSE
P	J9VZ02	47	5	54	9	52	47	0	0.027983	0.00748933	0.0161587	0.010482	0.000184574	0	0	0	0	0	0	0.0209395	0	0	0	0	0	0	4	0	0	0	0	0	0	0.009	0	0	Ribosome biogenesis protein MAK21 OS=Cryptococcus neoformans var. grubii serotype A (strain H99 / ATCC 208821 / CBS 10515 / FGSC 9487) OX=235443 GN=CNAG_04365 PE=4 SV=1	1	0_0_0_0_1_0_0_	0	0.0045	0	0	4	0	FALSE	FALSE	FALSE
P	J9VZY7	4	0	0	0	0	0	0	0.000111588	0	0	0	0.000282747	0	0	0	0	0	0	0.0715193	0	0	0	0	0	0	4	0	0	0	0	0	0	0.03	0	0	Large subunit GTPase 1 OS=Cryptococcus neoformans var. grubii serotype A (strain H99 / ATCC 208821 / CBS 10515 / FGSC 9487) OX=235443 GN=CNAG_01634 PE=4 SV=2	1	0_0_0_0_1_0_0_	0	0.015	0	0	4	0	FALSE	FALSE	FALSE
P	J9VW13	40	0	55	0	202	285	4	0.00289605	0	0.00232649	0	0.0013024	0	0	0	0	0	0	0.849269	0	0	0	0	0	0	3	0	0	0	0	0	0	0.267	0	0	Uncharacterized protein OS=Cryptococcus neoformans var. grubii serotype A (strain H99 / ATCC 208821 / CBS 10515 / FGSC 9487) OX=235443 GN=CNAG_05572 PE=3 SV=1	1	0_0_0_0_1_0_0_	0	0.1335	0	0	3	0	FALSE	FALSE	FALSE
P	J9VX05	26	0	54	0	51	48	0	0.00875682	0	0.017479	0	0.000250462	0	0	0	0	0	0	0.16681	0	0	0	0	0	0	3	0	0	0	0	0	0	0.067	0	0	U3 small nucleolar RNA-associated protein 7 OS=Cryptococcus neoformans var. grubii serotype A (strain H99 / ATCC 208821 / CBS 10515 / FGSC 9487) OX=235443 GN=CNAG_06748 PE=4 SV=1	1	0_0_0_0_1_0_0_	0	0.0335	0	0	3	0	FALSE	FALSE	FALSE
P	J9VWX1	0	0	2	0	0	0	0	0	0	8.01388e-05	0	0.00279086	0	0	0	0.570363	0	0	0.570363	0	0	0	2	0	0	3	0	0	0	0.196	0	0	0.196	0	0	Small subunit ribosomal protein S29 OS=Cryptococcus neoformans var. grubii serotype A (strain H99 / ATCC 208821 / CBS 10515 / FGSC 9487) OX=235443 GN=CNAG_02811 PE=4 SV=2	2	0_1_0_0_1_0_0_	0	0.098	0	0	3	0	FALSE	FALSE	FALSE
P	J9VXV8	0	0	3	0	0	2	0	0	0	0.000231901	0	0.0011751	0	0	0	0	0	0	0.741807	0	0	0	0	0	0	3	0	0	0	0	0	0	0.241	0	0	Uncharacterized protein OS=Cryptococcus neoformans var. grubii serotype A (strain H99 / ATCC 208821 / CBS 10515 / FGSC 9487) OX=235443 GN=CNAG_05572 PE=3 SV=2	1	0_0_0_0_1_0_0_	0	0.1205	0	0	3	0	FALSE	FALSE	FALSE
P	J9VY95	0	0	4	0	0	2	0	0	0	0.000224517	0	0.000704001	0	0	0	0.169499	0	0	0.169499	0	0	0	2	0	0	3	0	0	0	0.068	0	0	0.068	0	0	Elongation factor 1-beta OS=Cryptococcus neoformans var. grubii serotype A (strain H99 / ATCC 208821 / CBS 10515 / FGSC 9487) OX=235443 GN=CNAG_02714 PE=3 SV=1	2	0_1_0_0_1_0_0_	0	0.034	0	0	3	0	FALSE	FALSE	FALSE
P	J9VZS2	0	0	0	0	0	3	0	0	0	0	0	0.000161122	0	0	0	0	0	0	0.0616956	0	0	0	0	0	0	3	0	0	0	0	0	0	0.026	0	0	U3 small nucleolar RNA-associated protein 4 OS=Cryptococcus neoformans var. grubii serotype A (strain H99 / ATCC 208821 / CBS 10515 / FGSC 9487) OX=235443 GN=CNAG_06005 PE=4 SV=1	1	0_0_0_0_1_0_0_	0	0.013	0	0	3	0	FALSE	FALSE	FALSE
P	CNAG_04954-Tagged	51	0	52	0	35	21	435	0.00325953	0	0.00373879	0	0	0.000624299	0	0	0	0	0	0	0.309182	0	0	0	0	0	0	3	0	0	0	0	0	0	0.117	0	Small subunit ribosomal protein S5 OS=Cryptococcus neoformans var. grubii serotype A (strain H99 / ATCC 208821 / CBS 10515 / FGSC 9487) OX=235443 GN=CNAG_01990 PE=3 SV=1	1	0_0_0_0_0_1_0_	0	0.0585	0	0	3	0	FALSE	FALSE	FALSE
P	J9VVU8	2	0	0	0	0	0	0	0.000166582	0	0	0	0	0.000155695	0	0	0	0	0	0	0.0739894	0	0	0	0	0	0	2	0	0	0	0	0	0	0.031	0	Cytoplasmic protein, variant OS=Cryptococcus neoformans var. grubii serotype A (strain H99 / ATCC 208821 / CBS 10515 / FGSC 9487) OX=235443 GN=CNAG_02943 PE=4 SV=1	1	0_0_0_0_0_1_0_	0	0.0155	0	0	2	0	FALSE	FALSE	FALSE
P	J9VW23	2	0	4	0	0	0	0	0.000568511	0	0.00049295	0	0.000312889	0	0	0	0	0	0	0.196741	0	0	0	0	0	0	2	0	0	0	0	0	0	0.078	0	0	U3 small nucleolar RNA-associated protein 7, variant 2 OS=Cryptococcus neoformans var. grubii serotype A (strain H99 / ATCC 208821 / CBS 10515 / FGSC 9487) OX=235443 GN=CNAG_07466 PE=4 SV=1	1	0_0_0_0_1_0_0_	0	0.039	0	0	2	0	FALSE	FALSE	FALSE
P	J9VVQ9	0	0	0	0	0	0	4	0	0	0	0	0.000337191	0	0	0	0	0	0	0.0616956	0	0	0	0	0	0	2	0	0	0	0	0	0	0.026	0	0	Transformer-2-beta isoform 3 OS=Cryptococcus neoformans var. grubii serotype A (strain H99 / ATCC 208821 / CBS 10515 / FGSC 9487) OX=235443 GN=CNAG_00399 PE=4 SV=2	1	0_0_0_0_1_0_0_	0	0.013	0	0	2	0	FALSE	FALSE	FALSE
P	J9VX01	2	0	4	0	0	0	0	0.000152727	0	0.000135438	0	0.000299403	0	0	0	0	0	0	0.188502	0	0	0	0	0	0	2	0	0	0	0	0	0	0.075	0	0	U3 small nucleolar RNA-associated protein 7, variant 1 OS=Cryptococcus neoformans var. grubii serotype A (strain H99 / ATCC 208821 / CBS 10515 / FGSC 9487) OX=235443 GN=CNAG_07466 PE=4 SV=2	1	0_0_0_0_1_0_0_	0	0.0375	0	0	2	0	FALSE	FALSE	FALSE
P	J9VWE4	0	0	4	0	0	0	0	0	0	0.000136961	0	0.000795359	0	0	0	0	0	0	0.129796	0	0	0	0	0	0	2	0	0	0	0	0	0	0.053	0	0	Histone H2A OS=Cryptococcus neoformans var. grubii serotype A (strain H99 / ATCC 208821 / CBS 10515 / FGSC 9487) OX=235443 GN=CNAG_06747 PE=3 SV=1	1	0_0_0_0_1_0_0_	0	0.0265	0	0	2	0	FALSE	FALSE	FALSE
P	J9VWD4	13	0	14	0	4	4	0	0.000683964	0	0.000566101	0	0.000241745	0	0	0	0	0	0	0.124605	0	0	0	0	0	0	2	0	0	0	0	0	0	0.051	0	0	Uncharacterized protein OS=Cryptococcus neoformans var. grubii serotype A (strain H99 / ATCC 208821 / CBS 10515 / FGSC 9487) OX=235443 GN=CNAG_00361 PE=4 SV=1	1	0_0_0_0_1_0_0_	0	0.0255	0	0	2	0	FALSE	FALSE	FALSE
P	J9VX68	4	0	2	0	2	0	0	0.000266756	0	0.000141935	0	0.000358048	0	0	0	0.153453	0	0	0.247383	0	0	0	2	0	0	2	0	0	0	0.062	0	0	0.096	0	0	Uncharacterized protein OS=Cryptococcus neoformans var. grubii serotype A (strain H99 / ATCC 208821 / CBS 10515 / FGSC 9487) OX=235443 GN=CNAG_07361 PE=4 SV=1	2	0_1_0_0_1_0_0_	0	0.048	0	0	2	0	FALSE	FALSE	FALSE
P	J9VWU5	0	0	3	0	0	0	0	0	0	0.000345784	0	0.000111914	0	0	0	0	0	0	0.0616956	0	0	0	0	0	0	2	0	0	0	0	0	0	0.026	0	0	Nucleolar protein 14 OS=Cryptococcus neoformans var. grubii serotype A (strain H99 / ATCC 208821 / CBS 10515 / FGSC 9487) OX=235443 GN=CNAG_03820 PE=4 SV=2	1	0_0_0_0_1_0_0_	0	0.013	0	0	2	0	FALSE	FALSE	FALSE
P	J9VWQ7	2	0	2	0	3	0	0	0.000134974	0	7.18167e-05	0	0	0.00133314	0	0	0	0	0	0	1.208	0	0	0	0	0	0	2	0	0	0	0	0	0	0.344	0	H/ACA ribonucleoprotein complex subunit 3 OS=Cryptococcus neoformans var. grubii serotype A (strain H99 / ATCC 208821 / CBS 10515 / FGSC 9487) OX=235443 GN=CNAG_01049 PE=4 SV=2	1	0_0_0_0_0_1_0_	0	0.172	0	0	2	0	FALSE	FALSE	FALSE
P	J9VXI8	0	0	6	0	0	0	0	0	0	0.000238935	0	0	0.000135645	0	0	0	0	0	0	0.0641431	0	0	0	0	0	0	2	0	0	0	0	0	0	0.027	0	Cytoplasmic protein OS=Cryptococcus neoformans var. grubii serotype A (strain H99 / ATCC 208821 / CBS 10515 / FGSC 9487) OX=235443 GN=CNAG_02943 PE=4 SV=2	1	0_0_0_0_0_1_0_	0	0.0135	0	0	2	0	FALSE	FALSE	FALSE
P	J9VXK4	44	15	56	7	29	30	3	0.0604536	0.0738323	0.0563088	0.0370947	0	0.00129274	0	0	0	0	0	0	0.520548	0	0	0	0	0	0	2	0	0	0	0	0	0	0.182	0	40S ribosomal protein S30 OS=Cryptococcus neoformans var. grubii serotype A (strain H99 / ATCC 208821 / CBS 10515 / FGSC 9487) OX=235443 GN=CNAG_00819 PE=3 SV=1	1	0_0_0_0_0_1_0_	0	0.091	0	0	2	0	FALSE	FALSE	FALSE
P	J9VXF1	4	0	5	0	2	0	0	0.000310458	0	0.000183542	0	0	7.18795e-05	0	0	0	0	0	0	0.0399202	0	0	0	0	0	0	2	0	0	0	0	0	0	0.017	0	ATP-dependent RNA helicase DHX8/PRP22 OS=Cryptococcus neoformans var. grubii serotype A (strain H99 / ATCC 208821 / CBS 10515 / FGSC 9487) OX=235443 GN=CNAG_00960 PE=4 SV=1	1	0_0_0_0_0_1_0_	0	0.0085	0	0	2	0	FALSE	FALSE	FALSE
P	J9VY72	2	0	0	0	0	0	0	0.00019134	0	0	0	0.000184411	0	0	0	0	0	0	0.0889301	0	0	0	0	0	0	2	0	0	0	0	0	0	0.037	0	0	60S ribosomal export protein NMD3 OS=Cryptococcus neoformans var. grubii serotype A (strain H99 / ATCC 208821 / CBS 10515 / FGSC 9487) OX=235443 GN=CNAG_02672 PE=3 SV=1	1	0_0_0_0_1_0_0_	0	0.0185	0	0	2	0	FALSE	FALSE	FALSE
P	J9VY34	5	0	4	0	0	0	0	0.00100907	0	0.00044742	0	0	9.99074e-05	0	0	0	0	0	0	0.0280163	0	0	0	0	0	0	2	0	0	0	0	0	0	0.012	0	Uncharacterized protein OS=Cryptococcus neoformans var. grubii serotype A (strain H99 / ATCC 208821 / CBS 10515 / FGSC 9487) OX=235443 GN=CNAG_06203 PE=4 SV=2	1	0_0_0_0_0_1_0_	0	0.006	0	0	2	0	FALSE	FALSE	FALSE
P	J9VYU9	0	0	0	0	3	0	0	0	0	0	0	0.000100766	0	0	0	0	0	0	0.0280163	0	0	0	0	0	0	2	0	0	0	0	0	0	0.012	0	0	FACT complex subunit SPT16 OS=Cryptococcus neoformans var. grubii serotype A (strain H99 / ATCC 208821 / CBS 10515 / FGSC 9487) OX=235443 GN=CNAG_01726 PE=4 SV=1	1	0_0_0_0_1_0_0_	0	0.006	0	0	2	0	FALSE	FALSE	FALSE
P	J9VZ70	67	3	91	2	16	40	15	0.0100695	0.00211984	0.00718725	0.000593383	0.000227991	0	0	0	0	0	0	0.0839269	0	0	0	0	0	0	2	0	0	0	0	0	0	0.035	0	0	Protein BFR2 OS=Cryptococcus neoformans var. grubii serotype A (strain H99 / ATCC 208821 / CBS 10515 / FGSC 9487) OX=235443 GN=CNAG_04395 PE=4 SV=1	1	0_0_0_0_1_0_0_	0	0.0175	0	0	2	0	FALSE	FALSE	FALSE
P	J9VZK2	0	0	3	0	2	0	0	0	0	0.000164756	0	0.00027564	0	0	0	0	0	0	0.0690548	0	0	0	0	0	0	2	0	0	0	0	0	0	0.029	0	0	Isocitrate dehydrogenase, NAD-dependent OS=Cryptococcus neoformans var. grubii serotype A (strain H99 / ATCC 208821 / CBS 10515 / FGSC 9487) OX=235443 GN=CNAG_07851 PE=4 SV=1	1	0_0_0_0_1_0_0_	0	0.0145	0	0	2	0	FALSE	FALSE	FALSE
P	J9VX99	4	0	7	0	0	4	0	0.000414125	0	0.000342761	0	0	0	0.00169885	0	0	0	0	0	0	0.116863	0	0	0	0	0	0	12	0	0	0	0	0	0	0.048	THO complex subunit 2 OS=Cryptococcus neoformans var. grubii serotype A (strain H99 / ATCC 208821 / CBS 10515 / FGSC 9487) OX=235443 GN=CNAG_03942 PE=4 SV=1	1	0_0_0_0_0_0_1_	0	0	0.048	0	0	12	FALSE	FALSE	FALSE
P	J9VW24	5	0	3	0	4	0	0	0.000581442	0	0.000123749	0	0	0	0.00423125	0	0	0	0	0	0	0.614359	0	0	0	0	0	0	8	0	0	0	0	0	0	0.208	DNA binding protein Ncp1, variant OS=Cryptococcus neoformans var. grubii serotype A (strain H99 / ATCC 208821 / CBS 10515 / FGSC 9487) OX=235443 GN=CNAG_03771 PE=4 SV=1	1	0_0_0_0_0_0_1_	0	0	0.208	0	0	8	FALSE	FALSE	TRUE	CNAG_03771
P	J9VWI9	2	0	2	0	0	0	0	9.85766e-05	0	6.99338e-05	0	0	0	0.0040907	0	0	0	0	0	0	0.588547	0	0	0	0	0	0	8	0	0	0	0	0	0	0.201	DNA binding protein Ncp1 OS=Cryptococcus neoformans var. grubii serotype A (strain H99 / ATCC 208821 / CBS 10515 / FGSC 9487) OX=235443 GN=CNAG_03771 PE=4 SV=2	1	0_0_0_0_0_0_1_	0	0	0.201	0	0	8	FALSE	FALSE	TRUE	CNAG_03771
P	J9VXP7	0	0	4	0	0	0	0	0	0	0.000468185	0	0	0	0.00285073	0	0	0	0	0	0	0.0592537	0	0	0	0	0	0	5	0	0	0	0	0	0	0.025	Peptidyl-prolyl cis-trans isomerase OS=Cryptococcus neoformans var. grubii serotype A (strain H99 / ATCC 208821 / CBS 10515 / FGSC 9487) OX=235443 GN=CNAG_00504 PE=3 SV=2	1	0_0_0_0_0_0_1_	0	0	0.025	0	0	5	FALSE	FALSE	FALSE
P	J9VXY1	3	0	6	0	0	0	0	9.45627e-05	0	0.000134172	0	0	0	0.00208546	0	0	0	0	0	0	0.177606	0	0	0	0	0	0	4	0	0	0	0	0	0	0.071	DNA-directed RNA polymerase III subunit RPC6 OS=Cryptococcus neoformans var. grubii serotype A (strain H99 / ATCC 208821 / CBS 10515 / FGSC 9487) OX=235443 GN=CNAG_06641 PE=4 SV=1	1	0_0_0_0_0_0_1_	0	0	0.071	0	0	4	FALSE	FALSE	FALSE
P	J9VY31	11	0	8	0	6	5	0	0.00162525	0	0.00105692	0	0	0	0.00354528	0	0	0	0	0	0	0.367729	0	0	0	0	0	0	4	0	0	0	0	0	0	0.136	Uncharacterized protein OS=Cryptococcus neoformans var. grubii serotype A (strain H99 / ATCC 208821 / CBS 10515 / FGSC 9487) OX=235443 GN=CNAG_05776 PE=4 SV=1	1	0_0_0_0_0_0_1_	0	0	0.136	0	0	4	FALSE	FALSE	TRUE	CNAG_05776
P	J9VYP1	22	2	42	12	28	28	2	0.00716588	0.0028008	0.00613885	0.0130666	0	0	0.00184533	0	0	0	0	0	0	0.191242	0	0	0	0	0	0	4	0	0	0	0	0	0	0.076	Eukaryotic translation initiation factor 3 subunit L OS=Cryptococcus neoformans var. grubii serotype A (strain H99 / ATCC 208821 / CBS 10515 / FGSC 9487) OX=235443 GN=CNAG_05105 PE=3 SV=1	1	0_0_0_0_0_0_1_	0	0	0.076	0	0	4	FALSE	FALSE	FALSE
P	J9VZ34	0	0	3	0	0	0	0	0	0	0.000257905	0	0	0	0.00150572	0	0	0	0	0	0	0.129796	0	0	0	0	0	0	4	0	0	0	0	0	0	0.053	THO complex subunit 1 OS=Cryptococcus neoformans var. grubii serotype A (strain H99 / ATCC 208821 / CBS 10515 / FGSC 9487) OX=235443 GN=CNAG_03235 PE=4 SV=1	1	0_0_0_0_0_0_1_	0	0	0.053	0	0	4	FALSE	FALSE	FALSE
P	J9VZT6	4	0	7	0	10	7	2	0.00418726	0	0.00466808	0	0	0	0.00204535	0	0	0	0	0	0	0.127197	0	0	0	0	0	0	4	0	0	0	0	0	0	0.052	DNA-directed RNA polymerase III subunit RPC3 OS=Cryptococcus neoformans var. grubii serotype A (strain H99 / ATCC 208821 / CBS 10515 / FGSC 9487) OX=235443 GN=CNAG_02025 PE=4 SV=2	1	0_0_0_0_0_0_1_	0	0	0.052	0	0	4	FALSE	FALSE	FALSE
P	CNAG_01848-Tagged	616	0	590	0	312	308	58	0.0682631	0	0.0368803	0	0	0	0.000557823	0	0	0	0	0	0	0.0423174	0	0	0	0	0	0	3	0	0	0	0	0	0	0.018	ATPase OS=Cryptococcus neoformans var. grubii serotype A (strain H99 / ATCC 208821 / CBS 10515 / FGSC 9487) OX=235443 GN=CNAG_01340 PE=4 SV=2	1	0_0_0_0_0_0_1_	0	0	0.018	0	0	3	FALSE	FALSE	FALSE
P	J9VXH5	8	0	13	2	16	16	0	0.00534889	0	0.0041561	0.00164106	0	0	0.00134786	0	0	0	0	0	0	0.116863	0	0	0	0	0	0	2	0	0	0	0	0	0	0.048	Ubiquinol-cytochrome c reductase core subunit 2 OS=Cryptococcus neoformans var. grubii serotype A (strain H99 / ATCC 208821 / CBS 10515 / FGSC 9487) OX=235443 GN=CNAG_05179 PE=4 SV=1	1	0_0_0_0_0_0_1_	0	0	0.048	0	0	2	FALSE	FALSE	FALSE
P	J9VXW3	0	0	0	0	2	0	0	0	0	0	0	0	0	0.00176196	0	0	0	0	0	0	0.238797	0	0	0	0	0	0	2	0	0	0	0	0	0	0.093	Uncharacterized protein OS=Cryptococcus neoformans var. grubii serotype A (strain H99 / ATCC 208821 / CBS 10515 / FGSC 9487) OX=235443 GN=CNAG_07540 PE=4 SV=2	1	0_0_0_0_0_0_1_	0	0	0.093	0	0	2	FALSE	FALSE	FALSE
P	J9VYK4	0	0	2	0	0	0	0	0	0	7.95131e-05	0	0	0	0	0	0	0	0.0914403	0	0	0	0	0	0	9	0	0	0	0	0	0	0.038	0	0	0	Uncharacterized protein OS=Cryptococcus neoformans var. grubii serotype A (strain H99 / ATCC 208821 / CBS 10515 / FGSC 9487) OX=235443 GN=CNAG_06113 PE=4 SV=1	1	0_0_0_1_0_0_0_	0	0	0	0	0	0	FALSE	FALSE	FALSE
[truncated: 1 more columns]

## Sheet: Rde3,Rde5
																		4	5	6	7
PLine	Accession	peptide_count_HMBR-04_for_paper(searched:2019-03-11)	peptide_count_HMBR-05_for_paper(searched:2019-03-11)	peptide_count_HMBR-06_for_paper(searched:2019-03-11)	peptide_count_HMBR-07_for_paper(searched:2019-03-11)	NSAF_HMBR-04_for_paper(searched:2019-03-11)	NSAF_HMBR-05_for_paper(searched:2019-03-11)	NSAF_HMBR-06_for_paper(searched:2019-03-11)	NSAF_HMBR-07_for_paper(searched:2019-03-11)	EMPAI_HMBR-04_for_paper(searched:2019-03-11)	EMPAI_HMBR-05_for_paper(searched:2019-03-11)	EMPAI_HMBR-06_for_paper(searched:2019-03-11)	EMPAI_HMBR-07_for_paper(searched:2019-03-11)	spectral_count__HMBR-04_for_paper(searched:2019-03-11)	spectral_count__HMBR-05_for_paper(searched:2019-03-11)	spectral_count__HMBR-06_for_paper(searched:2019-03-11)	spectral_count__HMBR-07_for_paper(searched:2019-03-11)	seqcov_HMBR-04_for_paper(searched:2019-03-11)	seqcov_HMBR-05_for_paper(searched:2019-03-11)	seqcov_HMBR-06_for_paper(searched:2019-03-11)	seqcov_HMBR-07_for_paper(searched:2019-03-11)	description	occurrence	status	Rde5	Rde3				RDE3	RDE5
P	J9VNX5	8	7	127	136	0.001504	0.00119705	0.138683	0.128367	0.267652	0.267652	3.00867	3.72063	9	7	700	788	0.103	0.103	0.603	0.674	Ribonuclease III OS=Cryptococcus neoformans var. grubii serotype A (strain H99 / ATCC 208821 / CBS 10515 / FGSC 9487) OX=235443 GN=CNAG_06643 PE=4 SV=2	4	1_1_1_1_	15	1488	CNAG_06643	Rde3	1	0.6385	0.103
P	J9VMX2	0	0	39	41	0	0	0.00420705	0.00331805	0	0	1.0893	1.20293	0	0	49	47	0	0	0.32	0.343	Exosome complex exonuclease RRP6 OS=Cryptococcus neoformans var. grubii serotype A (strain H99 / ATCC 208821 / CBS 10515 / FGSC 9487) OX=235443 GN=CNAG_02773 PE=4 SV=2	2	0_0_1_1_	0	96	CNAG_02773	Rrp6	2	0.3315	0
P	T2BNW0	0	0	8	3	0	0	0.00401898	0.00123922	0	0	1.33884	0.986095	0	0	8	3	0	0	0.369	0.298	Uncharacterized protein OS=Cryptococcus neoformans var. grubii serotype A (strain H99 / ATCC 208821 / CBS 10515 / FGSC 9487) OX=235443 GN=CNAG_08025 PE=4 SV=1	2	0_0_1_1_	0	11	CNAG_08025	Rnh1	3	0.3335	0
P	J9VVL6	5	2	3	3	0.00280272	0.00114723	0.00199367	0.00218572	0.853532	0.199499	0.690441	0.690441	5	2	3	4	0.268	0.079	0.228	0.228	Ribonucleoprotein-associated protein OS=Cryptococcus neoformans var. grubii serotype A (strain H99 / ATCC 208821 / CBS 10515 / FGSC 9487) OX=235443 GN=CNAG_03435 PE=4 SV=1	4	1_1_1_1_	7	7	CNAG_03435	Snu13	4	0.228	0.1735
P	J9VLN9	2	3	4	4	0.000320672	0.000492224	0.000760347	0.000625194	0.137627	0.137627	0.205036	0.205036	2	3	4	4	0.056	0.056	0.081	0.081	Nucleolin OS=Cryptococcus neoformans var. grubii serotype A (strain H99 / ATCC 208821 / CBS 10515 / FGSC 9487) OX=235443 GN=CNAG_07362 PE=4 SV=1	4	1_1_1_1_	5	8	CNAG_07362	Nsr1	5	0.081	0.056
P	J9VUL6	50	51	60	88	0.00385551	0.00422723	0.00546876	0.00798665	0.713957	0.667247	0.892344	1.33346	56	60	67	119	0.234	0.222	0.277	0.368	FACT complex subunit SPT16 OS=Cryptococcus neoformans var. grubii serotype A (strain H99 / ATCC 208821 / CBS 10515 / FGSC 9487) OX=235443 GN=CNAG_01726 PE=4 SV=1	4	1_1_1_1_	101	186	CNAG_01726	Spt16	6	0.3225	0.228
P	J9VXA2	13	15	16	25	0.00157391	0.0018584	0.00244009	0.00377669	0.489361	0.361445	0.44544	0.840772	13	15	17	32	0.173	0.134	0.16	0.265	FACT complex subunit POB3 OS=Cryptococcus neoformans var. grubii serotype A (strain H99 / ATCC 208821 / CBS 10515 / FGSC 9487) OX=235443 GN=CNAG_05661 PE=3 SV=1	4	1_1_1_1_	28	49	CNAG_05661	Pob3	7	0.2125	0.1535
P	J9VR32	10	10	11	23	0.00226717	0.00255204	0.00295664	0.00552521	0.81134	0.380384	0.452112	0.990673	10	11	11	25	0.258	0.14	0.162	0.299	rRNA 2'-O-methyltransferase fibrillarin OS=Cryptococcus neoformans var. grubii serotype A (strain H99 / ATCC 208821 / CBS 10515 / FGSC 9487) OX=235443 GN=CNAG_06919 PE=3 SV=1	4	1_1_1_1_	20	36	CNAG_06919	Nop1	8	0.2305	0.199
P	J9VKK7	5	7	19	25	0.000870283	0.00124681	0.00515883	0.00542956	0.425608	0.570363	0.999862	1.19786	5	7	25	32	0.154	0.196	0.301	0.342	FK506-binding protein OS=Cryptococcus neoformans var. grubii serotype A (strain H99 / ATCC 208821 / CBS 10515 / FGSC 9487) OX=235443 GN=CNAG_01148 PE=3 SV=2	4	1_1_1_1_	12	57	CNAG_01148	Fkbp4	9	0.3215	0.175
P	J9W092	215	222	97	8	0.210152	0.214684	0.0462487	0.00595829	5.28058	5.16595	2.23594	0.610646	1169	1167	217	34	0.798	0.79	0.51	0.207	Uncharacterized protein OS=Cryptococcus neoformans var. grubii serotype A (strain H99 / ATCC 208821 / CBS 10515 / FGSC 9487) OX=235443 GN=CNAG_04791 PE=4 SV=1	4	1_1_1_1_	437	251	CNAG_04791	Rde5	10	0.3585	0.794
P	J9VLL1	5	7	0	0	0.00167111	0.0023941	0	0	1.04174	1.04174	0	0	5	7	0	0	0.31	0.31	0	0	Uncharacterized protein OS=Cryptococcus neoformans var. grubii serotype A (strain H99 / ATCC 208821 / CBS 10515 / FGSC 9487) OX=235443 GN=CNAG_03959 PE=4 SV=1	2	1_1_0_0_	12	0	CNAG_03959	Aga1	11	0	0.31
P	CNAG_01848-Tagged	66	79	54	56	0.0191484	0.0196426	0.0166809	0.0145333	0.0665962	0.0665962	0.0690548	0.0690548	411	412	302	320	0.028	0.028	0.029	0.029	no description	4	1_1_1_1_	145	622
P	CNAG_04954-Tagged	66	79	54	56	0.0225762	0.0231588	0.0196669	0.017135	0.0789467	0.0789467	0.081434	0.081434	411	412	302	320	0.033	0.033	0.034	0.034	no description	4	1_1_1_1_	145	622
P	T2BNZ0	29	28	28	32	0.0110944	0.0122992	0.0146145	0.0162226	1.07014	1.50035	1.07014	1.50035	36	39	40	54	0.316	0.398	0.316	0.398	40S ribosomal protein S6 OS=Cryptococcus neoformans var. grubii serotype A (strain H99 / ATCC 208821 / CBS 10515 / FGSC 9487) OX=235443 GN=CNAG_01152 PE=3 SV=1	4	1_1_1_1_	57	94
P	T2BNJ0	4	10	0	0	0.000344742	0.000970147	0	0	0.109175	0.230269	0	0	4	11	0	0	0.045	0.09	0	0	Elongation factor 2, variant OS=Cryptococcus neoformans var. grubii serotype A (strain H99 / ATCC 208821 / CBS 10515 / FGSC 9487) OX=235443 GN=CNAG_06840 PE=4 SV=1	2	1_1_0_0_	14	0
P	J9VD88	12	12	10	13	0.00480245	0.0054926	0.00535864	0.00578305	1.21309	1.00447	0.949845	1.36048	17	19	16	21	0.345	0.302	0.29	0.373	Small subunit ribosomal protein S3 OS=Cryptococcus neoformans var. grubii serotype A (strain H99 / ATCC 208821 / CBS 10515 / FGSC 9487) OX=235443 GN=CNAG_00116 PE=3 SV=1	4	1_1_1_1_	24	37
P	J9VF80	0	11	0	0	0	0.000343481	0	0	0	0.111732	0	0	0	11	0	0	0	0.046	0	0	Carbamoyl-phosphate synthase, large subunit OS=Cryptococcus neoformans var. grubii serotype A (strain H99 / ATCC 208821 / CBS 10515 / FGSC 9487) OX=235443 GN=CNAG_07373 PE=3 SV=1	1	0_1_0_0_	11	0
P	J9VF99	15	16	19	30	0.00514295	0.00637084	0.00673904	0.0100269	1.37684	1.29615	1.23872	1.64241	19	23	21	38	0.376	0.361	0.35	0.422	40S ribosomal protein S4 OS=Cryptococcus neoformans var. grubii serotype A (strain H99 / ATCC 208821 / CBS 10515 / FGSC 9487) OX=235443 GN=CNAG_00640 PE=3 SV=1	4	1_1_1_1_	31	59
P	J9VF13	5	6	5	7	0.00448436	0.00401531	0.00398733	0.00491787	0.659587	0.659587	0.659587	0.603245	8	7	6	9	0.22	0.22	0.22	0.205	Large subunit ribosomal protein L29 OS=Cryptococcus neoformans var. grubii serotype A (strain H99 / ATCC 208821 / CBS 10515 / FGSC 9487) OX=235443 GN=CNAG_00771 PE=3 SV=1	4	1_1_1_1_	11	15
P	J9VEP2	2	2	0	0	0.00010852	0.000111051	0	0	0.0327615	0.0327615	0	0	2	2	0	0	0.014	0.014	0	0	DNA topoisomerase 2 OS=Cryptococcus neoformans var. grubii serotype A (strain H99 / ATCC 208821 / CBS 10515 / FGSC 9487) OX=235443 GN=CNAG_00377 PE=3 SV=2	2	1_1_0_0_	4	0
P	J9VF52	8	9	4	6	0.00755991	0.00902556	0.00373445	0.00552716	1.30675	1.66073	1.30675	1.08449	12	14	5	9	0.363	0.425	0.363	0.319	Large subunit ribosomal protein L34e OS=Cryptococcus neoformans var. grubii serotype A (strain H99 / ATCC 208821 / CBS 10515 / FGSC 9487) OX=235443 GN=CNAG_00821 PE=3 SV=1	4	1_1_1_1_	17	14
P	J9VEL7	15	20	21	45	0.00197104	0.00249158	0.00329896	0.00565119	0.729816	0.949845	0.555966	1.1677	17	21	24	50	0.238	0.29	0.192	0.336	Hsp75-like protein OS=Cryptococcus neoformans var. grubii serotype A (strain H99 / ATCC 208821 / CBS 10515 / FGSC 9487) OX=235443 GN=CNAG_00334 PE=3 SV=1	4	1_1_1_1_	35	74
P	J9VFG4	17	20	15	20	0.0175148	0.0219704	0.0174156	0.023683	2.65595	2.65595	1.73527	2.65595	31	38	26	43	0.563	0.563	0.437	0.563	Large subunit ribosomal protein L31e OS=Cryptococcus neoformans var. grubii serotype A (strain H99 / ATCC 208821 / CBS 10515 / FGSC 9487) OX=235443 GN=CNAG_00703 PE=4 SV=1	4	1_1_1_1_	37	69
P	J9VG91	6	7	6	6	0.00566994	0.00580215	0.00597512	0.00491303	1.88403	1.88403	0.879317	0.840772	9	9	8	8	0.46	0.46	0.274	0.265	Large subunit ribosomal protein L30e OS=Cryptococcus neoformans var. grubii serotype A (strain H99 / ATCC 208821 / CBS 10515 / FGSC 9487) OX=235443 GN=CNAG_00232 PE=4 SV=1	4	1_1_1_1_	13	16
P	J9VFY8	12	14	4	15	0.00661042	0.00832562	0.00241139	0.00941811	1.39332	1.68534	0.721869	1.77332	13	16	4	19	0.379	0.429	0.236	0.443	Small subunit ribosomal protein S16 OS=Cryptococcus neoformans var. grubii serotype A (strain H99 / ATCC 208821 / CBS 10515 / FGSC 9487) OX=235443 GN=CNAG_03780 PE=3 SV=1	4	1_1_1_1_	26	23
P	J9VFV3	7	7	3	7	0.00401066	0.00359116	0.00178307	0.00439838	1.2856	1.2856	1.00909	1.2856	8	7	3	9	0.359	0.359	0.303	0.359	Large subunit ribosomal protein L27Ae OS=Cryptococcus neoformans var. grubii serotype A (strain H99 / ATCC 208821 / CBS 10515 / FGSC 9487) OX=235443 GN=CNAG_03747 PE=3 SV=1	4	1_1_1_1_	14	12
P	J9VG26	0	0	0	2	0	0	0	0.00105949	0	0	0	0.324342	0	0	0	2	0	0	0	0.122	Histone H2A OS=Cryptococcus neoformans var. grubii serotype A (strain H99 / ATCC 208821 / CBS 10515 / FGSC 9487) OX=235443 GN=CNAG_06747 PE=3 SV=1	1	0_0_0_1_	0	2
P	J9VGY9	3	2	2	3	0.00391149	0.00320216	0.00278237	0.0045756	0.355189	0.355189	0.355189	0.355189	5	4	3	6	0.132	0.132	0.132	0.132	Ribosomal protein L37 OS=Cryptococcus neoformans var. grubii serotype A (strain H99 / ATCC 208821 / CBS 10515 / FGSC 9487) OX=235443 GN=CNAG_03015 PE=3 SV=1	4	1_1_1_1_	5	9
P	J9VGW3	9	10	7	14	0.00508494	0.00614961	0.00493238	0.00766066	0.958845	0.958845	0.686553	1.34423	11	13	9	17	0.292	0.292	0.227	0.37	Large subunit ribosomal protein L23 OS=Cryptococcus neoformans var. grubii serotype A (strain H99 / ATCC 208821 / CBS 10515 / FGSC 9487) OX=235443 GN=CNAG_03053 PE=3 SV=1	4	1_1_1_1_	19	26
P	J9VGP4	0	0	0	2	0	0	0	0.000450627	0	0	0	0.213389	0	0	0	2	0	0	0	0.084	Cell growth-regulating nucleolar protein OS=Cryptococcus neoformans var. grubii serotype A (strain H99 / ATCC 208821 / CBS 10515 / FGSC 9487) OX=235443 GN=CNAG_03817 PE=4 SV=1	1	0_0_0_1_	0	2
P	J9VHC1	32	36	22	30	0.0269241	0.0336227	0.0173125	0.0204631	1.93765	1.93765	1.93765	1.93765	59	72	32	46	0.468	0.468	0.468	0.468	Large subunit ribosomal protein L28e OS=Cryptococcus neoformans var. grubii serotype A (strain H99 / ATCC 208821 / CBS 10515 / FGSC 9487) OX=235443 GN=CNAG_04068 PE=4 SV=1	4	1_1_1_1_	68	78
P	J9VHE4	13	15	10	14	0.00697933	0.00857049	0.00606787	0.00725716	1.25424	1.32274	0.999862	1.66073	15	18	11	16	0.353	0.366	0.301	0.425	Small subunit ribosomal protein S11 OS=Cryptococcus neoformans var. grubii serotype A (strain H99 / ATCC 208821 / CBS 10515 / FGSC 9487) OX=235443 GN=CNAG_00672 PE=3 SV=1	4	1_1_1_1_	28	27
P	J9VHS2	0	4	0	0	0	0.000726675	0	0	0	0.127197	0	0	0	4	0	0	0	0.052	0	0	ATP-dependent RNA helicase eIF4A OS=Cryptococcus neoformans var. grubii serotype A (strain H99 / ATCC 208821 / CBS 10515 / FGSC 9487) OX=235443 GN=CNAG_00785 PE=4 SV=1	1	0_1_0_0_	4	0
P	J9VJC5	8	9	5	9	0.00773795	0.0102939	0.00642163	0.0105603	1.46037	2.08319	0.492794	1.86418	10	13	7	14	0.391	0.489	0.174	0.457	Large subunit ribosomal protein L37a OS=Cryptococcus neoformans var. grubii serotype A (strain H99 / ATCC 208821 / CBS 10515 / FGSC 9487) OX=235443 GN=CNAG_04011 PE=3 SV=1	4	1_1_1_1_	17	21
P	J9VJ71	12	13	16	15	0.00446677	0.00485661	0.00661949	0.0062593	0.584893	1.0797	1.21309	0.686553	16	17	20	23	0.2	0.318	0.345	0.227	Large subunit ribosomal protein L8 OS=Cryptococcus neoformans var. grubii serotype A (strain H99 / ATCC 208821 / CBS 10515 / FGSC 9487) OX=235443 GN=CNAG_05232 PE=4 SV=1	4	1_1_1_1_	25	43
P	J9VJ75	0	0	3	0	0	0	0.000461194	0	0	0	0.177606	0	0	0	3	0	0	0	0.071	0	RNP domain-containing protein OS=Cryptococcus neoformans var. grubii serotype A (strain H99 / ATCC 208821 / CBS 10515 / FGSC 9487) OX=235443 GN=CNAG_05013 PE=1 SV=2	1	0_0_1_0_	0	3
P	J9VJJ6	4	11	0	0	0.000339805	0.00104319	0	0	0.106624	0.258925	0	0	4	12	0	0	0.044	0.1	0	0	Elongation factor 2 OS=Cryptococcus neoformans var. grubii serotype A (strain H99 / ATCC 208821 / CBS 10515 / FGSC 9487) OX=235443 GN=CNAG_06840 PE=4 SV=2	2	1_1_0_0_	15	0
P	J9VL70	10	0	0	0	0.00710412	0	0	0	1.03236	0	0	0	48	0	0	0	0.308	0	0	0	Uncharacterized protein OS=Cryptococcus neoformans var. grubii serotype A (strain H99 / ATCC 208821 / CBS 10515 / FGSC 9487) OX=235443 GN=CNAG_01157 PE=4 SV=2	1	1_0_0_0_	10	0
P	J9VL75	29	28	28	32	0.0108135	0.0119878	0.0142445	0.0158119	1.03236	1.44343	1.03236	1.44343	36	39	40	54	0.308	0.388	0.308	0.388	40S ribosomal protein S6 OS=Cryptococcus neoformans var. grubii serotype A (strain H99 / ATCC 208821 / CBS 10515 / FGSC 9487) OX=235443 GN=CNAG_01152 PE=3 SV=1	4	1_1_1_1_	57	94
P	J9VKV8	4	6	11	17	0.00230706	0.00303538	0.00703321	0.00835329	0.348963	0.348963	0.936422	1.32274	7	9	18	26	0.13	0.13	0.287	0.366	Large subunit ribosomal protein L10-like OS=Cryptococcus neoformans var. grubii serotype A (strain H99 / ATCC 208821 / CBS 10515 / FGSC 9487) OX=235443 GN=CNAG_03739 PE=4 SV=1	4	1_1_1_1_	10	44
P	J9VL11	4	15	2	3	0.000635618	0.00260176	0.000376779	0.000464709	0.241652	0.794734	0.101539	0.196741	4	16	2	3	0.094	0.254	0.042	0.078	Tubulin alpha chain OS=Cryptococcus neoformans var. grubii serotype A (strain H99 / ATCC 208821 / CBS 10515 / FGSC 9487) OX=235443 GN=CNAG_03787 PE=3 SV=1	4	1_1_1_1_	19	5
P	J9VKN9	0	2	0	5	0	0.00107925	0	0.00257024	0	0.849269	0	0.879317	0	2	0	5	0	0.267	0	0.274	Small subunit ribosomal protein S24e OS=Cryptococcus neoformans var. grubii serotype A (strain H99 / ATCC 208821 / CBS 10515 / FGSC 9487) OX=235443 GN=CNAG_01332 PE=3 SV=1	2	0_1_0_1_	2	5
P	J9VKI8	0	0	2	6	0	0	0.000335581	0.000827792	0	0	0.127197	0.279381	0	0	2	6	0	0	0.052	0.107	H/ACA ribonucleoprotein complex subunit 4 OS=Cryptococcus neoformans var. grubii serotype A (strain H99 / ATCC 208821 / CBS 10515 / FGSC 9487) OX=235443 GN=CNAG_01168 PE=4 SV=1	2	0_0_1_1_	0	8
P	J9VKK2	5	6	9	10	0.00282871	0.00385956	0.00614824	0.0068937	0.399587	0.603245	0.95434	1.99916	6	8	11	15	0.146	0.205	0.291	0.477	Small subunit ribosomal protein S13e OS=Cryptococcus neoformans var. grubii serotype A (strain H99 / ATCC 208821 / CBS 10515 / FGSC 9487) OX=235443 GN=CNAG_01153 PE=3 SV=1	4	1_1_1_1_	11	26
P	J9VLG8	0	0	0	3	0	0	0	0.00325297	0	0	0	0.432188	0	0	0	3	0	0	0	0.156	H/ACA ribonucleoprotein complex subunit 3 OS=Cryptococcus neoformans var. grubii serotype A (strain H99 / ATCC 208821 / CBS 10515 / FGSC 9487) OX=235443 GN=CNAG_01049 PE=4 SV=2	1	0_0_0_1_	0	3
P	J9VLE6	11	11	4	4	0.00827781	0.0112944	0.00261701	0.00322775	1.39883	1.31206	0.737801	0.380384	15	20	4	6	0.38	0.364	0.24	0.14	Polyubiquitin OS=Cryptococcus neoformans var. grubii serotype A (strain H99 / ATCC 208821 / CBS 10515 / FGSC 9487) OX=235443 GN=CNAG_00370 PE=4 SV=1	4	1_1_1_1_	22	10
P	J9VKX7	4	7	6	6	0.000769613	0.00137823	0.00136862	0.00112535	0.306171	0.315225	0.315225	0.315225	4	7	6	6	0.116	0.119	0.119	0.119	Homoisocitrate dehydrogenase OS=Cryptococcus neoformans var. grubii serotype A (strain H99 / ATCC 208821 / CBS 10515 / FGSC 9487) OX=235443 GN=CNAG_01264 PE=4 SV=1	4	1_1_1_1_	11	12
P	J9VLW1	2	2	3	4	0.000632793	0.000647548	0.00112531	0.00123372	0.119438	0.119438	0.119438	0.213389	2	2	3	4	0.049	0.049	0.049	0.084	H/ACA ribonucleoprotein complex subunit 2 OS=Cryptococcus neoformans var. grubii serotype A (strain H99 / ATCC 208821 / CBS 10515 / FGSC 9487) OX=235443 GN=CNAG_02378 PE=4 SV=1	4	1_1_1_1_	4	7
P	J9VM66	30	32	30	36	0.00996649	0.0107817	0.0141789	0.0144345	1.14783	1.48886	1.33346	0.958845	35	37	42	52	0.332	0.396	0.368	0.292	Large subunit ribosomal protein L7e OS=Cryptococcus neoformans var. grubii serotype A (strain H99 / ATCC 208821 / CBS 10515 / FGSC 9487) OX=235443 GN=CNAG_00656 PE=4 SV=1	4	1_1_1_1_	62	94
P	J9VLP5	32	34	25	34	0.0123688	0.0157512	0.0120569	0.013665	2.72392	2.17687	1.38781	2.38065	45	56	37	51	0.571	0.502	0.378	0.529	40S ribosomal protein S1 OS=Cryptococcus neoformans var. grubii serotype A (strain H99 / ATCC 208821 / CBS 10515 / FGSC 9487) OX=235443 GN=RPS1 PE=3 SV=1	4	1_1_1_1_	66	88
P	J9VLJ8	9	14	0	0	0.00158983	0.00289228	0	0	0.482518	1.15278	0	0	9	16	0	0	0.171	0.333	0	0	Chaperone regulator OS=Cryptococcus neoformans var. grubii serotype A (strain H99 / ATCC 208821 / CBS 10515 / FGSC 9487) OX=235443 GN=CNAG_03944 PE=3 SV=1	2	1_1_0_0_	23	0
P	J9VMY2	0	0	4	3	0	0	0.000354243	0.000218457	0	0	0.116863	0.0889301	0	0	4	3	0	0	0.048	0.037	Eukaryotic translation initiation factor 3 subunit A OS=Cryptococcus neoformans var. grubii serotype A (strain H99 / ATCC 208821 / CBS 10515 / FGSC 9487) OX=235443 GN=TIF32 PE=3 SV=1	2	0_0_1_1_	0	7
P	J9VMP7	0	5	0	0	0	0.000571815	0	0	0	0.177606	0	0	0	5	0	0	0	0.071	0	0	ATP-dependent RNA helicase ded1 OS=Cryptococcus neoformans var. grubii serotype A (strain H99 / ATCC 208821 / CBS 10515 / FGSC 9487) OX=235443 GN=CNAG_00809 PE=3 SV=1	1	0_1_0_0_	5	0
P	J9VMQ3	3	2	6	8	0.00323587	0.00220755	0.00767259	0.0115661	0.520548	0.520548	0.520548	0.520548	3	2	6	11	0.182	0.182	0.182	0.182	40S ribosomal protein S30 OS=Cryptococcus neoformans var. grubii serotype A (strain H99 / ATCC 208821 / CBS 10515 / FGSC 9487) OX=235443 GN=CNAG_00819 PE=3 SV=1	4	1_1_1_1_	5	17
P	J9VN41	0	0	0	6	0	0	0	0.000339902	0	0	0	0.207814	0	0	0	6	0	0	0	0.082	Translation initiation factor aIF-2 OS=Cryptococcus neoformans var. grubii serotype A (strain H99 / ATCC 208821 / CBS 10515 / FGSC 9487) OX=235443 GN=CNAG_03606 PE=4 SV=1	1	0_0_0_1_	0	6
P	J9VMM1	12	15	10	17	0.0062814	0.0096418	0.0080675	0.0122465	1.76058	1.76058	1.37137	2.11172	12	18	13	24	0.441	0.441	0.375	0.493	Large subunit ribosomal protein L27e OS=Cryptococcus neoformans var. grubii serotype A (strain H99 / ATCC 208821 / CBS 10515 / FGSC 9487) OX=235443 GN=CNAG_00779 PE=4 SV=1	4	1_1_1_1_	27	37
P	J9VMN2	6	11	10	12	0.00221314	0.00452948	0.00481028	0.00431481	0.949845	1.04644	0.949845	1.14783	6	12	11	12	0.29	0.311	0.29	0.332	Small subunit ribosomal protein S9 OS=Cryptococcus neoformans var. grubii serotype A (strain H99 / ATCC 208821 / CBS 10515 / FGSC 9487) OX=235443 GN=CNAG_02331 PE=3 SV=1	4	1_1_1_1_	17	23
P	J9VNF3	0	0	0	3	0	0	0	0.000299554	0	0	0	0.0519619	0	0	0	3	0	0	0	0.022	Ribosomal RNA methyltransferase Nop2 OS=Cryptococcus neoformans var. grubii serotype A (strain H99 / ATCC 208821 / CBS 10515 / FGSC 9487) OX=235443 GN=CNAG_03724 PE=3 SV=1	1	0_0_0_1_	0	3
P	J9VNG8	0	0	0	3	0	0	0	0.00065675	0	0	0	0.0990058	0	0	0	3	0	0	0	0.041	Ribosome production factor 2 OS=Cryptococcus neoformans var. grubii serotype A (strain H99 / ATCC 208821 / CBS 10515 / FGSC 9487) OX=235443 GN=CNAG_01187 PE=4 SV=1	1	0_0_0_1_	0	3
P	J9VND0	51	52	62	64	0.0174265	0.0151769	0.0224184	0.0142167	1.43781	1.42103	1.51768	1.55859	141	120	153	118	0.387	0.384	0.401	0.408	Thyroid hormone receptor interactor 13 OS=Cryptococcus neoformans var. grubii serotype A (strain H99 / ATCC 208821 / CBS 10515 / FGSC 9487) OX=235443 GN=CNAG_02578 PE=3 SV=2	4	1_1_1_1_	103	271
P	J9VNN9	0	0	3	0	0	0	0.00228104	0	0	0	1.15278	0	0	0	3	0	0	0	0.333	0	Large subunit acidic ribosomal protein P2 OS=Cryptococcus neoformans var. grubii serotype A (strain H99 / ATCC 208821 / CBS 10515 / FGSC 9487) OX=235443 GN=CNAG_05762 PE=3 SV=1	1	0_0_1_0_	0	3
P	J9W0I6	7	6	7	11	0.00250414	0.00219646	0.00296879	0.00418472	0.552387	0.552387	0.534617	0.803018	7	6	7	12	0.191	0.191	0.186	0.256	Large subunit ribosomal protein L13 OS=Cryptococcus neoformans var. grubii serotype A (strain H99 / ATCC 208821 / CBS 10515 / FGSC 9487) OX=235443 GN=CNAG_06231 PE=3 SV=1	4	1_1_1_1_	13	19
P	J9W0K1	2	8	0	0	0.000123915	0.000507218	0	0	0.0495424	0.174898	0	0	2	8	0	0	0.021	0.07	0	0	ATP-citrate synthase OS=Cryptococcus neoformans var. grubii serotype A (strain H99 / ATCC 208821 / CBS 10515 / FGSC 9487) OX=235443 GN=CNAG_04640 PE=3 SV=1	2	1_1_0_0_	10	0
P	J9W0B1	31	37	34	41	0.00823677	0.00943226	0.0109276	0.0128087	1.8119	2.19154	1.88403	2.79315	42	47	47	67	0.449	0.504	0.46	0.579	Large subunit ribosomal protein L4e OS=Cryptococcus neoformans var. grubii serotype A (strain H99 / ATCC 208821 / CBS 10515 / FGSC 9487) OX=235443 GN=CNAG_04762 PE=4 SV=1	4	1_1_1_1_	68	114
P	J9VPA5	15	12	13	17	0.00856411	0.00657286	0.00951863	0.014088	1.92415	1.41546	1.41546	1.63633	16	12	15	27	0.466	0.383	0.383	0.421	Large subunit ribosomal protein L24 OS=Cryptococcus neoformans var. grubii serotype A (strain H99 / ATCC 208821 / CBS 10515 / FGSC 9487) OX=235443 GN=CNAG_04021 PE=4 SV=1	4	1_1_1_1_	27	42
P	J9VP81	6	6	11	9	0.000751998	0.000769534	0.00163448	0.00109959	0.238797	0.230269	0.327394	0.250259	6	6	11	9	0.093	0.09	0.123	0.097	Nucleolar protein 58 OS=Cryptococcus neoformans var. grubii serotype A (strain H99 / ATCC 208821 / CBS 10515 / FGSC 9487) OX=235443 GN=CNAG_05976 PE=4 SV=1	4	1_1_1_1_	12	20
P	J9VQ09	2	0	0	0	0.000325809	0	0	0	0.129796	0	0	0	2	0	0	0	0.053	0	0	0	Uncharacterized protein OS=Cryptococcus neoformans var. grubii serotype A (strain H99 / ATCC 208821 / CBS 10515 / FGSC 9487) OX=235443 GN=CNAG_03118 PE=4 SV=1	1	1_0_0_0_	2	0
P	J9VPP7	0	0	3	2	0	0	0.00046288	0.000253735	0	0	0.0519619	0.0519619	0	0	3	2	0	0	0.022	0.022	ATP synthase subunit beta OS=Cryptococcus neoformans var. grubii serotype A (strain H99 / ATCC 208821 / CBS 10515 / FGSC 9487) OX=235443 GN=CNAG_05918 PE=3 SV=1	2	0_0_1_1_	0	5
P	J9W225	15	15	7	9	0.0128966	0.0174205	0.0103969	0.012069	2.06196	2.06196	0.761976	1.50611	25	33	17	24	0.486	0.486	0.246	0.399	Large subunit ribosomal protein L23 OS=Cryptococcus neoformans var. grubii serotype A (strain H99 / ATCC 208821 / CBS 10515 / FGSC 9487) OX=235443 GN=CNAG_01976 PE=3 SV=1	4	1_1_1_1_	30	41
P	J9VPE0	3	3	2	3	0.00196384	0.00251204	0.00174618	0.00239299	0.857804	0.857804	0.857804	0.857804	4	5	3	5	0.269	0.269	0.269	0.269	Small subunit ribosomal protein S23 OS=Cryptococcus neoformans var. grubii serotype A (strain H99 / ATCC 208821 / CBS 10515 / FGSC 9487) OX=235443 GN=CNAG_03127 PE=3 SV=1	4	1_1_1_1_	6	8
P	J9VQB5	3	2	4	8	0.00037468	0.000255611	0.00059227	0.000973987	0.0939563	0.0375284	0.148154	0.336596	3	2	4	8	0.039	0.016	0.06	0.126	Nucleolar protein 56 OS=Cryptococcus neoformans var. grubii serotype A (strain H99 / ATCC 208821 / CBS 10515 / FGSC 9487) OX=235443 GN=CNAG_02209 PE=4 SV=1	4	1_1_1_1_	5	12
P	J9VPZ8	3	3	3	5	0.0041876	0.00571366	0.00496462	0.00680359	0.570363	0.570363	0.570363	0.570363	3	4	3	5	0.196	0.196	0.196	0.196	Large subunit ribosomal protein L39 OS=Cryptococcus neoformans var. grubii serotype A (strain H99 / ATCC 208821 / CBS 10515 / FGSC 9487) OX=235443 GN=CNAG_01455 PE=3 SV=2	4	1_1_1_1_	6	8
P	J9W1R2	11	18	7	11	0.00207038	0.00358542	0.00132168	0.00170775	0.503142	0.745822	0.30017	0.361445	13	22	7	11	0.177	0.242	0.114	0.134	Tubulin beta chain OS=Cryptococcus neoformans var. grubii serotype A (strain H99 / ATCC 208821 / CBS 10515 / FGSC 9487) OX=235443 GN=CNAG_01840 PE=3 SV=2	4	1_1_1_1_	29	18
P	J9W1U6	0	0	2	2	0	0	0.00032461	0.00026691	0	0	0.1324	0.101539	0	0	2	2	0	0	0.054	0.042	Carboxypeptidase OS=Cryptococcus neoformans var. grubii serotype A (strain H99 / ATCC 208821 / CBS 10515 / FGSC 9487) OX=235443 GN=CNAG_01879 PE=3 SV=1	2	0_0_1_1_	0	4
P	J9VR33	12	10	11	17	0.0134682	0.013126	0.0114052	0.0175054	0.644372	0.644372	0.644372	0.678804	21	20	15	28	0.216	0.216	0.216	0.225	60S ribosomal protein L36 OS=Cryptococcus neoformans var. grubii serotype A (strain H99 / ATCC 208821 / CBS 10515 / FGSC 9487) OX=235443 GN=CNAG_03510 PE=3 SV=1	4	1_1_1_1_	22	43
P	J9VQI1	3	0	0	5	0.000944989	0	0	0.00153532	0.342765	0	0	0.503142	3	0	0	5	0.128	0	0	0.177	Ribosomal protein OS=Cryptococcus neoformans var. grubii serotype A (strain H99 / ATCC 208821 / CBS 10515 / FGSC 9487) OX=235443 GN=CNAG_02144 PE=3 SV=1	2	1_0_0_1_	3	5
P	J9VQI0	11	14	14	19	0.00569513	0.00825624	0.00787719	0.0115661	1.22331	1.22331	1.43781	1.47172	12	17	14	25	0.347	0.347	0.387	0.393	Large subunit ribosomal protein L24e OS=Cryptococcus neoformans var. grubii serotype A (strain H99 / ATCC 208821 / CBS 10515 / FGSC 9487) OX=235443 GN=CNAG_03283 PE=4 SV=1	4	1_1_1_1_	25	39
P	J9W2J0	15	19	19	21	0.0026309	0.00411756	0.00403645	0.00377155	0.840772	0.786488	0.741807	0.741807	17	26	22	25	0.265	0.252	0.241	0.241	Elongation factor 1-alpha OS=Cryptococcus neoformans var. grubii serotype A (strain H99 / ATCC 208821 / CBS 10515 / FGSC 9487) OX=235443 GN=CNAG_06125 PE=3 SV=1	4	1_1_1_1_	34	47
P	J9VQF9	0	0	0	2	0	0	0	0.000125378	0	0	0	0.0256519	0	0	0	2	0	0	0	0.011	Uncharacterized protein OS=Cryptococcus neoformans var. grubii serotype A (strain H99 / ATCC 208821 / CBS 10515 / FGSC 9487) OX=235443 GN=CNAG_02164 PE=4 SV=2	1	0_0_0_1_	0	2
P	J9W2G5	12	15	17	25	0.00625076	0.00675188	0.0107042	0.0121867	1.12324	1.51189	1.39883	1.84446	18	19	26	36	0.327	0.4	0.38	0.454	Large subunit ribosomal protein L13e OS=Cryptococcus neoformans var. grubii serotype A (strain H99 / ATCC 208821 / CBS 10515 / FGSC 9487) OX=235443 GN=CNAG_06095 PE=3 SV=1	4	1_1_1_1_	27	62
P	J9W3D8	0	0	0	3	0	0	0	0.000312597	0	0	0	0.1324	0	0	0	3	0	0	0	0.054	Nucleolar GTP-binding protein 1 OS=Cryptococcus neoformans var. grubii serotype A (strain H99 / ATCC 208821 / CBS 10515 / FGSC 9487) OX=235443 GN=CNAG_06468 PE=3 SV=1	1	0_0_0_1_	0	3
P	J9VQZ9	3	23	0	0	0.000202434	0.00158818	0	0	0.081434	0.482518	0	0	3	23	0	0	0.034	0.171	0	0	Elongation factor 3 OS=Cryptococcus neoformans var. grubii serotype A (strain H99 / ATCC 208821 / CBS 10515 / FGSC 9487) OX=235443 GN=CNAG_01117 PE=4 SV=2	2	1_1_0_0_	26	0
P	J9W2U5	4	4	3	3	0.00331112	0.0050825	0.00327126	0.00215183	0.402814	0.402814	0.238797	0.238797	6	9	5	4	0.147	0.147	0.093	0.093	Large subunit ribosomal protein L32e OS=Cryptococcus neoformans var. grubii serotype A (strain H99 / ATCC 208821 / CBS 10515 / FGSC 9487) OX=235443 GN=CNAG_06222 PE=4 SV=1	4	1_1_1_1_	8	9
P	J9VRL6	0	0	0	2	0	0	0	0.000178168	0	0	0	0.0739894	0	0	0	2	0	0	0	0.031	Protein KRI1 OS=Cryptococcus neoformans var. grubii serotype A (strain H99 / ATCC 208821 / CBS 10515 / FGSC 9487) OX=235443 GN=CNAG_04376 PE=4 SV=1	1	0_0_0_1_	0	2
P	J9VRM8	0	0	3	7	0	0	0.000399362	0.000766208	0	0	0.161449	0.213389	0	0	3	7	0	0	0.065	0.084	Eukaryotic translation initiation factor 3 subunit L OS=Cryptococcus neoformans var. grubii serotype A (strain H99 / ATCC 208821 / CBS 10515 / FGSC 9487) OX=235443 GN=CNAG_05105 PE=3 SV=1	2	0_0_1_1_	0	10
P	J9VRH1	3	2	0	0	0.000629993	0.000429789	0	0	0.330454	0.21899	0	0	3	2	0	0	0.124	0.086	0	0	Glyceraldehyde-3-phosphate dehydrogenase OS=Cryptococcus neoformans var. grubii serotype A (strain H99 / ATCC 208821 / CBS 10515 / FGSC 9487) OX=235443 GN=CNAG_06699 PE=3 SV=1	2	1_1_0_0_	5	0
P	J9VSC8	10	6	10	15	0.0040365	0.00262858	0.00478548	0.00679657	0.94536	0.625549	0.644372	0.667247	11	7	11	19	0.289	0.211	0.216	0.222	Ribosomal protein L19 OS=Cryptococcus neoformans var. grubii serotype A (strain H99 / ATCC 208821 / CBS 10515 / FGSC 9487) OX=235443 GN=CNAG_04448 PE=3 SV=1	4	1_1_1_1_	16	30
P	J9VSD8	0	0	3	3	0	0	0.000902658	0.000278329	0	0	0.0471286	0.0471286	0	0	8	3	0	0	0.02	0.02	DNA helicase, variant OS=Cryptococcus neoformans var. grubii serotype A (strain H99 / ATCC 208821 / CBS 10515 / FGSC 9487) OX=235443 GN=CNAG_04458 PE=4 SV=1	2	0_0_1_1_	0	11
P	J9VSC4	0	2	3	5	0	0.000910615	0.00210996	0.00346983	0	0.352073	0.563148	0.563148	0	2	4	8	0	0.131	0.194	0.194	Large subunit ribosomal protein L21e OS=Cryptococcus neoformans var. grubii serotype A (strain H99 / ATCC 208821 / CBS 10515 / FGSC 9487) OX=235443 GN=CNAG_02330 PE=4 SV=1	3	0_1_1_1_	2	12
P	J9VS82	0	0	0	3	0	0	0	0.0007254	0	0	0	0.101539	0	0	0	3	0	0	0	0.042	Ribosome biogenesis protein BRX1 OS=Cryptococcus neoformans var. grubii serotype A (strain H99 / ATCC 208821 / CBS 10515 / FGSC 9487) OX=235443 GN=CNAG_02382 PE=4 SV=1	1	0_0_0_1_	0	3
P	J9VSV5	80	124	32	157	0.00497826	0.00995714	0.00182425	0.0129264	1.13796	1.60615	0.552387	1.95801	110	215	34	293	0.33	0.416	0.191	0.471	ATPase OS=Cryptococcus neoformans var. grubii serotype A (strain H99 / ATCC 208821 / CBS 10515 / FGSC 9487) OX=235443 GN=CNAG_01340 PE=4 SV=2	4	1_1_1_1_	204	327
P	J9VT86	0	0	5	6	0	0	0.00108203	0.00106764	0	0	0.258925	0.258925	0	0	5	6	0	0	0.1	0.1	rRNA-processing protein EBP2 OS=Cryptococcus neoformans var. grubii serotype A (strain H99 / ATCC 208821 / CBS 10515 / FGSC 9487) OX=235443 GN=CNAG_01236 PE=4 SV=1	2	0_0_1_1_	0	11
P	J9VSL1	19	17	17	16	0.0184375	0.0172951	0.0182155	0.0169747	2.40408	2.40408	2.40408	2.40408	36	33	30	34	0.532	0.532	0.532	0.532	Large subunit ribosomal protein L14e OS=Cryptococcus neoformans var. grubii serotype A (strain H99 / ATCC 208821 / CBS 10515 / FGSC 9487) OX=235443 GN=CNAG_04799 PE=4 SV=1	4	1_1_1_1_	36	64
P	J9VT09	0	0	0	3	0	0	0	0.000849754	0	0	0	0.352073	0	0	0	3	0	0	0	0.131	Eukaryotic translation initiation factor 6 OS=Cryptococcus neoformans var. grubii serotype A (strain H99 / ATCC 208821 / CBS 10515 / FGSC 9487) OX=235443 GN=TIF6 PE=3 SV=1	1	0_0_0_1_	0	3
P	J9VSJ2	17	19	19	27	0.00969385	0.0092999	0.0111334	0.0132887	1.36592	1.66686	0.782379	2.20627	32	30	31	45	0.374	0.426	0.251	0.506	60S ribosomal protein L6 OS=Cryptococcus neoformans var. grubii serotype A (strain H99 / ATCC 208821 / CBS 10515 / FGSC 9487) OX=235443 GN=CNAG_02234 PE=3 SV=1	4	1_1_1_1_	36	76
P	J9VTH9	11	11	12	13	0.0205445	0.0176011	0.0543776	0.0251504	0.663413	0.663413	0.663413	0.663413	43	36	96	54	0.221	0.221	0.221	0.221	Calmodulin OS=Cryptococcus neoformans var. grubii serotype A (strain H99 / ATCC 208821 / CBS 10515 / FGSC 9487) OX=235443 GN=CNAG_01557 PE=4 SV=2	4	1_1_1_1_	22	150
P	J9VTA4	4	3	3	4	0.00215725	0.00176604	0.00255753	0.00210293	0.541701	0.541701	0.233105	0.541701	5	4	5	5	0.188	0.188	0.091	0.188	Large subunit ribosomal protein L12 OS=Cryptococcus neoformans var. grubii serotype A (strain H99 / ATCC 208821 / CBS 10515 / FGSC 9487) OX=235443 GN=CNAG_01480 PE=3 SV=1	4	1_1_1_1_	7	10
P	J9VTA9	12	5	11	19	0.00495845	0.00181217	0.00461882	0.00655988	0.879317	0.65577	0.636817	0.879317	14	5	11	19	0.274	0.219	0.214	0.274	Ribosomal protein L15 OS=Cryptococcus neoformans var. grubii serotype A (strain H99 / ATCC 208821 / CBS 10515 / FGSC 9487) OX=235443 GN=CNAG_01486 PE=3 SV=1	4	1_1_1_1_	17	30
P	J9VTC1	13	16	17	21	0.0086917	0.0110121	0.0107952	0.0133145	1.11836	1.58821	1.5527	1.80543	21	26	22	33	0.326	0.413	0.407	0.448	60S ribosomal protein L20 OS=Cryptococcus neoformans var. grubii serotype A (strain H99 / ATCC 208821 / CBS 10515 / FGSC 9487) OX=235443 GN=CNAG_04726 PE=3 SV=1	4	1_1_1_1_	29	55
P	J9VTE3	15	15	18	20	0.0109522	0.0106981	0.0165256	0.0135881	2.50752	2.50752	1.54683	2.50752	22	21	28	28	0.545	0.545	0.406	0.545	Small subunit ribosomal protein S17 OS=Cryptococcus neoformans var. grubii serotype A (strain H99 / ATCC 208821 / CBS 10515 / FGSC 9487) OX=235443 GN=CNAG_01170 PE=3 SV=1	4	1_1_1_1_	30	56
P	J9VT96	7	4	7	10	0.00337212	0.00191708	0.00444203	0.00474819	1.01837	0.644372	0.644372	0.879317	9	5	10	13	0.305	0.216	0.216	0.274	Large subunit ribosomal protein L18-A OS=Cryptococcus neoformans var. grubii serotype A (strain H99 / ATCC 208821 / CBS 10515 / FGSC 9487) OX=235443 GN=CNAG_01224 PE=4 SV=1	4	1_1_1_1_	11	23
P	J9VSX5	9	10	0	0	0.000445551	0.000506601	0	0	0.156112	0.137627	0	0	9	10	0	0	0.063	0.056	0	0	Fatty acid synthase subunit alpha, fungi type OS=Cryptococcus neoformans var. grubii serotype A (strain H99 / ATCC 208821 / CBS 10515 / FGSC 9487) OX=235443 GN=CNAG_02100 PE=4 SV=1	2	1_1_0_0_	19	0
P	J9VTV3	17	18	13	8	0.00262046	0.00268157	0.00224372	0.00113532	0.520548	0.570363	0.563148	0.294196	18	18	13	8	0.182	0.196	0.194	0.112	Homocitrate synthase, mitochondrial OS=Cryptococcus neoformans var. grubii serotype A (strain H99 / ATCC 208821 / CBS 10515 / FGSC 9487) OX=235443 GN=CNAG_00992 PE=3 SV=1	4	1_1_1_1_	35	21
P	J9VU89	5	5	6	6	0.00358937	0.00306089	0.00567385	0.00466532	0.472312	0.472312	0.472312	0.472312	6	5	8	8	0.168	0.168	0.168	0.168	Small subunit ribosomal protein S20 OS=Cryptococcus neoformans var. grubii serotype A (strain H99 / ATCC 208821 / CBS 10515 / FGSC 9487) OX=235443 GN=CNAG_01628 PE=3 SV=1	4	1_1_1_1_	10	16
P	J9VTY7	0	0	0	2	0	0	0	0.000404645	0	0	0	0.0764652	0	0	0	2	0	0	0	0.032	Protein MAK16 OS=Cryptococcus neoformans var. grubii serotype A (strain H99 / ATCC 208821 / CBS 10515 / FGSC 9487) OX=235443 GN=CNAG_05755 PE=3 SV=1	1	0_0_0_1_	0	2
P	J9VU43	61	60	42	35	0.00887093	0.00873736	0.00709894	0.00486425	1.29087	1.5527	0.918669	0.840772	80	77	54	45	0.36	0.407	0.283	0.265	Hsp72-like protein OS=Cryptococcus neoformans var. grubii serotype A (strain H99 / ATCC 208821 / CBS 10515 / FGSC 9487) OX=235443 GN=CNAG_01750 PE=3 SV=1	4	1_1_1_1_	121	99
P	J9VU28	4	9	7	7	0.00271197	0.00624422	0.00562657	0.00528736	0.770109	1.10863	0.770109	0.770109	4	9	7	8	0.248	0.324	0.248	0.248	Large subunit ribosomal protein L33-b OS=Cryptococcus neoformans var. grubii serotype A (strain H99 / ATCC 208821 / CBS 10515 / FGSC 9487) OX=235443 GN=CNAG_05800 PE=3 SV=1	4	1_1_1_1_	13	15
P	J9VTJ1	0	0	0	2	0	0	0	0.000555173	0	0	0	0.127197	0	0	0	2	0	0	0	0.052	Eukaryotic translation initiation factor 3 subunit K OS=Cryptococcus neoformans var. grubii serotype A (strain H99 / ATCC 208821 / CBS 10515 / FGSC 9487) OX=235443 GN=CNAG_01111 PE=3 SV=2	1	0_0_0_1_	0	2
P	J9VUC7	0	0	0	2	0	0	0	0.000358639	0	0	0	0.16681	0	0	0	2	0	0	0	0.067	Eukaryotic translation initiation factor 3 subunit H OS=Cryptococcus neoformans var. grubii serotype A (strain H99 / ATCC 208821 / CBS 10515 / FGSC 9487) OX=235443 GN=CNAG_02507 PE=3 SV=1	1	0_0_0_1_	0	2
P	J9VUD6	2	3	0	3	0.000949189	0.00145698	0	0.00138793	0.737801	0.737801	0	0.737801	2	3	0	3	0.24	0.24	0	0.24	Small subunit ribosomal protein S14 OS=Cryptococcus neoformans var. grubii serotype A (strain H99 / ATCC 208821 / CBS 10515 / FGSC 9487) OX=235443 GN=CNAG_05904 PE=3 SV=1	3	1_1_0_1_	5	3
P	J9VUB1	0	0	0	2	0	0	0	0.00134751	0	0	0	0.309182	0	0	0	2	0	0	0	0.117	Histone H4 OS=Cryptococcus neoformans var. grubii serotype A (strain H99 / ATCC 208821 / CBS 10515 / FGSC 9487) OX=235443 GN=CNAG_01648 PE=3 SV=1	1	0_0_0_1_	0	2
P	J9VUB5	0	0	2	0	0	0	0.000156294	0	0	0	0.0447202	0	0	0	2	0	0	0	0.019	0	Importin beta-4 subunit OS=Cryptococcus neoformans var. grubii serotype A (strain H99 / ATCC 208821 / CBS 10515 / FGSC 9487) OX=235443 GN=CNAG_05884 PE=4 SV=2	1	0_0_1_0_	0	2
P	J9VV50	17	19	17	23	0.00976309	0.0108233	0.0101278	0.0126897	1.29087	1.29087	1.25944	1.75423	24	26	21	32	0.36	0.36	0.354	0.44	Large subunit ribosomal protein L11, variant OS=Cryptococcus neoformans var. grubii serotype A (strain H99 / ATCC 208821 / CBS 10515 / FGSC 9487) OX=235443 GN=CNAG_07839 PE=3 SV=1	4	1_1_1_1_	36	53
P	J9VUT4	0	0	0	2	0	0	0	0.000693966	0	0	0	0.202264	0	0	0	2	0	0	0	0.08	Large subunit ribosomal protein L24e OS=Cryptococcus neoformans var. grubii serotype A (strain H99 / ATCC 208821 / CBS 10515 / FGSC 9487) OX=235443 GN=CNAG_01812 PE=4 SV=1	1	0_0_0_1_	0	2
P	J9VUU8	4	3	3	3	0.0033266	0.0020425	0.00315508	0.00259427	0.64059	0.64059	0.238797	0.238797	5	3	4	4	0.215	0.215	0.093	0.093	Small subunit ribosomal protein S25e OS=Cryptococcus neoformans var. grubii serotype A (strain H99 / ATCC 208821 / CBS 10515 / FGSC 9487) OX=235443 GN=CNAG_02359 PE=4 SV=1	4	1_1_1_1_	7	8
P	J9VV26	0	0	2	2	0	0	7.3104e-05	6.01097e-05	0	0	0.0139114	0.0139114	0	0	2	2	0	0	0.006	0.006	Adenylate cyclase OS=Cryptococcus neoformans var. grubii serotype A (strain H99 / ATCC 208821 / CBS 10515 / FGSC 9487) OX=235443 GN=CNAG_03202 PE=4 SV=2	2	0_0_1_1_	0	4
P	J9VV35	9	0	12	8	0.00185711	0	0.0029356	0.0016092	0.452112	0	0.96336	0.513561	9	0	12	8	0.162	0	0.293	0.18	Uncharacterized protein OS=Cryptococcus neoformans var. grubii serotype A (strain H99 / ATCC 208821 / CBS 10515 / FGSC 9487) OX=235443 GN=CNAG_06113 PE=4 SV=1	3	1_0_1_1_	9	20
P	J9VVM5	0	0	0	3	0	0	0	0.000665143	0	0	0	0.227439	0	0	0	3	0	0	0	0.089	Ribosome biogenesis regulatory protein OS=Cryptococcus neoformans var. grubii serotype A (strain H99 / ATCC 208821 / CBS 10515 / FGSC 9487) OX=235443 GN=CNAG_06273 PE=3 SV=1	1	0_0_0_1_	0	3
P	J9VVA4	0	5	0	0	0	0.000521096	0	0	0	0.210598	0	0	0	5	0	0	0	0.083	0	0	Hsp90-like protein OS=Cryptococcus neoformans var. grubii serotype A (strain H99 / ATCC 208821 / CBS 10515 / FGSC 9487) OX=235443 GN=CNAG_06150 PE=3 SV=1	1	0_1_0_0_	5	0
P	J9VW40	11	11	9	12	0.00417124	0.00426851	0.00395618	0.00542161	0.552387	0.552387	0.552387	0.761976	15	15	12	20	0.191	0.191	0.191	0.246	Small subunit ribosomal protein S2 OS=Cryptococcus neoformans var. grubii serotype A (strain H99 / ATCC 208821 / CBS 10515 / FGSC 9487) OX=235443 GN=CNAG_06605 PE=3 SV=1	4	1_1_1_1_	22	32
P	J9VW24	6	4	0	4	0.000629065	0.000429156	0	0.000408816	0.0964782	0.0964782	0	0.0964782	6	4	0	4	0.04	0.04	0	0.04	Glucose-regulated protein OS=Cryptococcus neoformans var. grubii serotype A (strain H99 / ATCC 208821 / CBS 10515 / FGSC 9487) OX=235443 GN=CNAG_06443 PE=3 SV=1	3	1_1_0_1_	10	4
P	J9VX05	11	7	14	23	0.00321154	0.00191708	0.0050766	0.00704401	0.786488	0.625549	0.914256	1.31739	12	7	16	27	0.252	0.211	0.282	0.365	Large subunit ribosomal protein L7Ae OS=Cryptococcus neoformans var. grubii serotype A (strain H99 / ATCC 208821 / CBS 10515 / FGSC 9487) OX=235443 GN=CNAG_05555 PE=4 SV=1	4	1_1_1_1_	18	43
P	J9VWK6	28	20	11	7	0.00206862	0.0014599	0.000930244	0.00048675	0.678804	0.51705	0.330454	0.202264	29	20	11	7	0.225	0.181	0.124	0.08	Plasma membrane ATPase OS=Cryptococcus neoformans var. grubii serotype A (strain H99 / ATCC 208821 / CBS 10515 / FGSC 9487) OX=235443 GN=CNAG_06400 PE=3 SV=1	4	1_1_1_1_	48	18
P	J9VXK4	6	8	5	8	0.00889865	0.0129004	0.00527491	0.00795169	1.37137	1.208	1.37137	1.37137	12	17	6	11	0.375	0.344	0.375	0.375	Uncharacterized protein OS=Cryptococcus neoformans var. grubii serotype A (strain H99 / ATCC 208821 / CBS 10515 / FGSC 9487) OX=235443 GN=CNAG_05556 PE=3 SV=1	4	1_1_1_1_	14	17
P	J9VXL7	18	17	21	24	0.00752963	0.0077052	0.00973829	0.0120109	1.37137	1.31739	1.00909	1.31739	22	22	24	36	0.375	0.365	0.303	0.365	40S ribosomal protein S8 OS=Cryptococcus neoformans var. grubii serotype A (strain H99 / ATCC 208821 / CBS 10515 / FGSC 9487) OX=235443 GN=CNAG_03198 PE=3 SV=1	4	1_1_1_1_	35	60
P	J9VXE8	14	14	21	21	0.0040158	0.00392265	0.00649219	0.00569408	0.468926	0.383566	0.690441	0.710015	22	21	30	32	0.167	0.141	0.228	0.233	Large subunit ribosomal protein L3 OS=Cryptococcus neoformans var. grubii serotype A (strain H99 / ATCC 208821 / CBS 10515 / FGSC 9487) OX=235443 GN=CNAG_01884 PE=3 SV=1	4	1_1_1_1_	28	62
P	J9VXH5	15	13	13	14	0.00826713	0.0089299	0.00925661	0.00761124	1.16272	1.40436	1.40436	1.66686	18	19	17	17	0.335	0.381	0.381	0.426	Small subunit ribosomal protein S18 OS=Cryptococcus neoformans var. grubii serotype A (strain H99 / ATCC 208821 / CBS 10515 / FGSC 9487) OX=235443 GN=CNAG_04883 PE=3 SV=1	4	1_1_1_1_	28	34
P	J9VXH6	10	11	4	4	0.00261588	0.0038241	0.000886074	0.00109286	3.14	3.14	1.5527	0.721869	14	20	4	6	0.617	0.617	0.407	0.236	Polyubiquitin OS=Cryptococcus neoformans var. grubii serotype A (strain H99 / ATCC 208821 / CBS 10515 / FGSC 9487) OX=235443 GN=CNAG_01920 PE=4 SV=1	4	1_1_1_1_	21	10
P	J9VYP1	33	31	24	25	0.0104833	0.00997934	0.00953819	0.00808043	2.81944	2.81944	1.74157	2.01301	43	40	33	34	0.582	0.582	0.438	0.479	40S ribosomal protein S0 OS=Cryptococcus neoformans var. grubii serotype A (strain H99 / ATCC 208821 / CBS 10515 / FGSC 9487) OX=235443 GN=RPS0 PE=3 SV=1	4	1_1_1_1_	64	67
P	J9VYN9	0	0	6	8	0	0	0.000848226	0.000929937	0	0	0.216186	0.425608	0	0	6	8	0	0	0.085	0.154	Nucleolar protein 12 OS=Cryptococcus neoformans var. grubii serotype A (strain H99 / ATCC 208821 / CBS 10515 / FGSC 9487) OX=235443 GN=CNAG_01564 PE=4 SV=1	2	0_0_1_1_	0	14
P	J9VZ02	38	33	28	30	0.0230778	0.0200135	0.0190129	0.019065	2.53997	2.16228	2.16228	1.78612	59	50	41	50	0.549	0.5	0.5	0.445	Large subunit ribosomal protein L22 OS=Cryptococcus neoformans var. grubii serotype A (strain H99 / ATCC 208821 / CBS 10515 / FGSC 9487) OX=235443 GN=CNAG_06447 PE=3 SV=1	4	1_1_1_1_	71	91
P	J9VZ70	86	89	61	45	0.014725	0.0150683	0.0103693	0.00647558	2.70681	2.68129	2.0903	1.51768	133	133	79	60	0.569	0.566	0.49	0.401	Hsp71-like protein OS=Cryptococcus neoformans var. grubii serotype A (strain H99 / ATCC 208821 / CBS 10515 / FGSC 9487) OX=235443 GN=CNAG_01727 PE=3 SV=1	4	1_1_1_1_	175	139
P	J9VZT6	8	10	7	15	0.00539312	0.00772643	0.00703321	0.0105146	0.545254	1.00909	0.545254	0.81134	10	14	11	20	0.189	0.303	0.189	0.258	40S ribosomal protein S26 OS=Cryptococcus neoformans var. grubii serotype A (strain H99 / ATCC 208821 / CBS 10515 / FGSC 9487) OX=235443 GN=CNAG_05525 PE=3 SV=1	4	1_1_1_1_	18	31
